# Supplementary material for: Characterization of the first vaginal Lactobacillus crispatus genomes isolated in Brazil
Source: PeerJ. 2021 Mar 10;9:e11079. doi: 10.7717/peerj.11079 (PMC7955673; doi:10.7717/peerj.11079)
Supplement: Supplemental Information 3 [file peerj-09-11079-s003.xlsx]

## Sheet: IS families
IS Families
IS110
IS1182
IS200/IS605
IS21
IS256
IS3
IS30
IS4
IS5
IS66
IS701
IS982
ISL3
ISNCY
new

## Sheet: CRI4
# seqid	family	nIS	%Genome	bps4IS	dnaLen
LcB143_contig_101	IS110	1	2.9	1763	60789
LcB143_contig_101	IS1182	1	2.93	1781	60789
LcB143_contig_101	IS256	1	2.39	1451	60789
LcB143_contig_102	IS256	1	2.39	1372	57463
LcB143_contig_102	IS982	1	2.88	1654	57463
LcB143_contig_103	IS30	1	3.52	1156	32804
LcB143_contig_104	IS256	1	2.59	1110	42775
LcB143_contig_104	IS30	1	2.56	1097	42775
LcB143_contig_11	IS256	1	2.98	1190	39873
LcB143_contig_11	IS3	1	4.83	1927	39873
LcB143_contig_12	IS110	2	3.86	2843	73560
LcB143_contig_13	IS30	1	5.93	1396	23533
LcB143_contig_15	IS256	2	8.43	3242	38456
LcB143_contig_16	IS1182	1	4.36	630	14446
LcB143_contig_17	IS3	1	5.28	1895	35922
LcB143_contig_17	IS4	1	3.17	1140	35922
LcB143_contig_17	IS982	1	2.13	765	35922
LcB143_contig_18	IS1182	1	5.92	1843	31116
LcB143_contig_18	IS30	1	2.11	656	31116
LcB143_contig_18	IS4	1	5.18	1612	31116
LcB143_contig_19	IS110	1	4.05	1204	29755
LcB143_contig_19	IS66	2	11.44	3405	29755
LcB143_contig_20	IS110	1	2.07	1204	58214
LcB143_contig_20	IS256	1	2.36	1373	58214
LcB143_contig_20	IS3	1	3.23	1879	58214
LcB143_contig_20	IS982	1	1.7	987	58214
LcB143_contig_24	IS256	1	21.65	1376	6356
LcB143_contig_25	IS200/IS605	1	23.21	1332	5738
LcB143_contig_25	IS256	1	19.31	1108	5738
LcB143_contig_28	IS982	1	9.71	969	9981
LcB143_contig_29	IS200/IS605	1	4.86	705	14503
LcB143_contig_3	IS21	1	6.49	1470	22663
LcB143_contig_30	IS21	1	9.37	1340	14296
LcB143_contig_30	IS256	1	9.6	1372	14296
LcB143_contig_31	IS200/IS605	1	1.76	1176	66941
LcB143_contig_31	IS21	1	2	1340	66941
LcB143_contig_31	IS256	2	8.7	5824	66941
LcB143_contig_31	IS30	3	6.37	4261	66941
LcB143_contig_32	IS256	2	6.1	2745	44965
LcB143_contig_33	IS30	1	76.37	501	656
LcB143_contig_34	IS110	1	62.97	335	532
LcB143_contig_35	IS110	1	20.35	1645	8082
LcB143_contig_35	IS982	1	26.59	2149	8082
LcB143_contig_37	IS256	1	11.41	1268	11110
LcB143_contig_37	IS3	2	10.97	1219	11110
LcB143_contig_37	IS982	1	7.46	829	11110
LcB143_contig_38	IS21	1	5.64	1340	23771
LcB143_contig_38	IS256	2	9.04	2150	23771
LcB143_contig_4	ISL3	1	7.19	1456	20256
LcB143_contig_40	IS256	1	52.73	1267	2403
LcB143_contig_42	IS256	4	12.21	5490	44981
LcB143_contig_42	IS30	1	5.33	2396	44981
LcB143_contig_42	IS982	1	2.15	969	44981
LcB143_contig_42	ISNCY	1	3.38	1522	44981
LcB143_contig_44	IS30	1	0.69	325	47339
LcB143_contig_45	IS982	1	4.16	969	23274
LcB143_contig_46	IS110	1	7.65	1744	22795
LcB143_contig_47	IS256	1	24.79	1124	4534
LcB143_contig_49	IS982	1	35.01	989	2825
LcB143_contig_50	IS110	1	0.85	1204	142017
LcB143_contig_50	IS256	1	0.97	1377	142017
LcB143_contig_50	IS30	1	0.81	1157	142017
LcB143_contig_51	IS256	2	8.82	2383	27017
LcB143_contig_51	IS982	1	3.59	969	27017
LcB143_contig_52	IS3	1	9.89	1895	19155
LcB143_contig_52	IS982	1	6.11	1170	19155
LcB143_contig_53	IS30	1	9.58	1212	12645
LcB143_contig_56	IS256	1	14.38	962	6692
LcB143_contig_57	IS256	1	5.44	1378	25316
LcB143_contig_59	IS256	2	12.93	2216	17140
LcB143_contig_6	IS256	1	27.91	1373	4919
LcB143_contig_61	IS3	1	53.27	1899	3565
LcB143_contig_62	IS256	1	4.11	1150	28000
LcB143_contig_62	IS3	1	10.28	2879	28000
LcB143_contig_62	IS982	1	11.84	3315	28000
LcB143_contig_64	IS256	2	5.55	2486	44775
LcB143_contig_65	IS110	1	10.03	675	6729
LcB143_contig_65	IS256	1	16.5	1110	6729
LcB143_contig_67	IS110	1	1.08	549	50669
LcB143_contig_67	IS200/IS605	1	2.81	1425	50669
LcB143_contig_68	IS256	1	5.98	701	11723
LcB143_contig_68	IS30	1	7.23	847	11723
LcB143_contig_69	IS3	1	3.48	1936	55672
LcB143_contig_69	IS30	1	3.44	1916	55672
LcB143_contig_7	IS256	1	6.78	2170	32006
LcB143_contig_70	IS21	1	2.2	1340	60850
LcB143_contig_70	IS256	3	3.72	2264	60850
LcB143_contig_71	IS982	1	14.01	974	6951
LcB143_contig_73	IS256	1	15.06	2944	19552
LcB143_contig_73	IS982	1	5.03	984	19552
LcB143_contig_77	IS982	1	3.95	1766	44691
LcB143_contig_8	IS110	1	78.27	1376	1758
LcB143_contig_80	IS3	1	3.84	1869	48719
LcB143_contig_81	IS110	1	0.94	1376	146216
LcB143_contig_81	IS30	1	0.81	1178	146216
LcB143_contig_81	IS982	2	1.5	2194	146216
LcB143_contig_83	IS110	1	6.21	1204	19394
LcB143_contig_85	IS3	1	15.04	1370	9111
LcB143_contig_87	IS200/IS605	1	2	1152	57503
LcB143_contig_87	IS3	2	6.49	3734	57503
LcB143_contig_90	IS982	1	3.26	985	30209
LcB143_contig_92	IS256	1	6.79	1120	16495
LcB143_contig_92	IS982	1	6.02	993	16495
LcB143_contig_93	IS200/IS605	1	57.16	1409	2465
LcB143_contig_94	IS110	1	5.29	1816	34333
LcB143_contig_94	IS200/IS605	1	3.88	1332	34333
LcB143_contig_94	IS256	1	4	1372	34333
LcB143_contig_94	IS30	1	3.46	1189	34333
LcB143_contig_95	IS256	1	58.92	733	1244
LcB143_contig_96	IS200/IS605	1	6.17	1176	19053
LcB143_contig_98	IS256	1	34.59	2264	6546
LcB143_contig_98	IS4	1	24.35	1594	6546
LcCRI4.fna	total	131	7.46	177342	2376268

## Sheet: CRI8
# seqid	family	nIS	%Genome	bps4IS	dnaLen
LcB144_contig_1	IS1182	1	5.29	1856	35058
LcB144_contig_1	IS21	1	4.19	1470	35058
LcB144_contig_10	IS256	1	2.34	1373	58677
LcB144_contig_10	IS30	1	1.98	1164	58677
LcB144_contig_10	IS4	2	6.11	3587	58677
LcB144_contig_10	IS982	1	1.65	967	58677
LcB144_contig_11	IS110	1	3.62	1467	40490
LcB144_contig_12	IS110	1	8.75	1461	16701
LcB144_contig_12	IS256	1	5.07	847	16701
LcB144_contig_12	IS3	2	21.11	3525	16701
LcB144_contig_12	IS30	1	4.51	754	16701
LcB144_contig_12	IS982	1	5.75	960	16701
LcB144_contig_13	IS110	1	1.91	351	18364
LcB144_contig_15	IS1182	1	7.54	3063	40616
LcB144_contig_16	IS110	1	2.25	1908	84982
LcB144_contig_16	IS1182	1	2.16	1838	84982
LcB144_contig_16	IS200/IS605	1	0.97	821	84982
LcB144_contig_16	IS256	1	1.61	1372	84982
LcB144_contig_16	IS30	2	2.85	2418	84982
LcB144_contig_17	IS256	1	3.46	1373	39650
LcB144_contig_18	IS110	1	0.89	1203	135338
LcB144_contig_18	IS1182	1	0.47	630	135338
LcB144_contig_18	IS256	1	1.02	1379	135338
LcB144_contig_18	IS30	1	0.58	790	135338
LcB144_contig_18	IS66	2	2	2700	135338
LcB144_contig_18	IS982	3	1.99	2689	135338
LcB144_contig_2	IS256	1	22.75	1398	6145
LcB144_contig_20	IS256	1	2.41	723	29962
LcB144_contig_20	IS982	1	1.37	409	29962
LcB144_contig_23	IS200/IS605	1	2.91	1332	45724
LcB144_contig_23	IS256	3	8.44	3857	45724
LcB144_contig_23	IS982	1	2.11	965	45724
LcB144_contig_24	IS256	1	72.31	235	325
LcB144_contig_25	IS21	1	10.86	1340	12338
LcB144_contig_26	IS256	2	23.88	1773	7426
LcB144_contig_26	IS30	1	18.54	1377	7426
LcB144_contig_27	IS200/IS605	1	5.13	1176	22924
LcB144_contig_27	IS256	1	5.99	1374	22924
LcB144_contig_27	IS30	1	5.11	1171	22924
LcB144_contig_28	IS256	1	3.97	1204	30340
LcB144_contig_28	IS982	1	3.18	964	30340
LcB144_contig_29	IS256	2	5.29	3479	65754
LcB144_contig_29	IS982	1	1.65	1087	65754
LcB144_contig_3	IS256	1	2.18	1372	62875
LcB144_contig_3	IS982	1	1.53	960	62875
LcB144_contig_3	ISL3	1	2.32	1456	62875
LcB144_contig_30	IS3	1	11.06	1090	9856
LcB144_contig_30	IS982	1	27.54	2714	9856
LcB144_contig_31	IS110	1	3.47	1645	47394
LcB144_contig_31	IS256	2	5.93	2809	47394
LcB144_contig_31	IS3	2	5.56	2633	47394
LcB144_contig_31	IS30	1	4.41	2088	47394
LcB144_contig_31	IS982	1	1.75	829	47394
LcB144_contig_32	IS256	2	17.95	2744	15290
LcB144_contig_32	IS30	1	12.62	1930	15290
LcB144_contig_32	ISNCY	1	9.95	1522	15290
LcB144_contig_33	IS256	1	1.98	1372	69313
LcB144_contig_33	IS30	1	2.82	1956	69313
LcB144_contig_35	IS200/IS605	1	9.72	1231	12661
LcB144_contig_36	IS110	1	9.04	1275	14105
LcB144_contig_36	IS256	1	9.73	1373	14105
LcB144_contig_36	IS982	1	6.87	969	14105
LcB144_contig_37	IS110	1	1.37	1204	87865
LcB144_contig_37	IS1182	1	2.09	1839	87865
LcB144_contig_37	IS256	5	7.8	6855	87865
LcB144_contig_37	IS30	1	1.68	1476	87865
LcB144_contig_38	IS30	1	1.92	695	36238
LcB144_contig_39	IS256	1	2.86	1372	47997
LcB144_contig_39	IS3	1	3.95	1895	47997
LcB144_contig_39	IS982	2	3.88	1862	47997
LcB144_contig_4	IS982	2	7.94	1890	23817
LcB144_contig_40	IS1182	1	1.49	944	63464
LcB144_contig_40	IS256	5	9.5	6031	63464
LcB144_contig_40	IS30	1	1.91	1212	63464
LcB144_contig_41	IS200/IS605	1	0.88	683	77298
LcB144_contig_41	IS256	2	3.55	2744	77298
LcB144_contig_41	IS4	1	2.1	1622	77298
LcB144_contig_41	IS66	1	0.81	628	77298
LcB144_contig_41	IS982	1	0.98	758	77298
LcB144_contig_43	IS256	1	11.8	1369	11600
LcB144_contig_44	IS110	1	1.25	1705	136568
LcB144_contig_44	IS256	3	3	4098	136568
LcB144_contig_44	new	1	1.53	2088	136568
LcB144_contig_45	IS256	1	43.03	805	1871
LcB144_contig_46	IS30	3	15.96	3491	21877
LcB144_contig_47	IS256	1	0.55	1372	249452
LcB144_contig_47	IS3	1	0.75	1869	249452
LcB144_contig_47	IS30	3	1.42	3533	249452
LcB144_contig_47	IS5	1	0.36	895	249452
LcB144_contig_47	IS982	2	0.78	1934	249452
LcB144_contig_47	ISL3	1	0.24	599	249452
LcB144_contig_47	new	1	0.84	2088	249452
LcB144_contig_48	ISL3	1	12.55	599	4774
LcB144_contig_49	IS110	1	1.35	678	50037
LcB144_contig_49	IS982	1	3.46	1733	50037
LcB144_contig_50	IS110	1	5.12	1275	24916
LcB144_contig_50	IS256	1	5.51	1372	24916
LcB144_contig_51	IS256	1	1.95	1369	70352
LcB144_contig_51	IS30	2	3.05	2143	70352
LcB144_contig_52	IS200/IS605	1	1.05	1152	109900
LcB144_contig_52	IS256	2	2.49	2740	109900
LcB144_contig_52	IS982	3	4.46	4906	109900
LcB144_contig_53	IS3	1	90.78	1112	1225
LcB144_contig_54	IS110	1	3.2	1204	37676
LcB144_contig_54	IS256	1	3.64	1371	37676
LcB144_contig_54	IS982	2	5.13	1934	37676
LcB144_contig_55	IS200/IS605	1	4.35	1332	30602
LcB144_contig_55	IS256	2	5.16	1580	30602
LcB144_contig_55	IS30	1	3.78	1157	30602
LcB144_contig_55	IS982	1	3.24	993	30602
LcB144_contig_56	IS256	2	18.28	2744	15015
LcB144_contig_57	IS256	1	100	299	299
LcB144_contig_58	IS1182	1	7.22	2933	40628
LcB144_contig_58	IS200/IS605	1	3.12	1269	40628
LcB144_contig_58	IS256	1	0.45	183	40628
LcB144_contig_59	IS256	2	16.56	1875	11323
LcB144_contig_59	IS30	2	33.32	3773	11323
LcB144_contig_60	IS30	1	4.24	1221	28820
LcB144_contig_60	IS982	1	3.36	969	28820
LcB144_contig_61	IS256	1	5.65	282	4989
LcB144_contig_62	IS256	1	4.74	1379	29096
LcB144_contig_62	IS30	1	2.95	857	29096
LcB144_contig_63	IS110	1	1.21	1763	145692
LcB144_contig_63	IS200/IS605	1	0.91	1332	145692
LcB144_contig_63	IS256	3	2.83	4117	145692
LcB144_contig_63	IS30	2	1.57	2286	145692
LcB144_contig_63	IS982	1	0.66	965	145692
LcB144_contig_65	IS256	1	54.91	257	468
LcCRI8.fna	total	171	9.21	214508	2330310

## Sheet: CRI10
# seqid	family	nIS	%Genome	bps4IS	dnaLen
LcB146_contig_1	IS21	1	11.25	1470	13066
LcB146_contig_11	IS110	1	7.1	1467	20659
LcB146_contig_11	IS982	1	4.67	965	20659
LcB146_contig_13	IS256	1	1.87	723	38710
LcB146_contig_13	IS30	2	6.85	2651	38710
LcB146_contig_15	IS1182	1	5.77	1838	31861
LcB146_contig_16	IS256	1	3.48	1373	39504
LcB146_contig_17	IS110	1	1.03	1203	116524
LcB146_contig_17	IS1182	1	0.54	630	116524
LcB146_contig_17	IS256	1	1.18	1372	116524
LcB146_contig_17	IS30	1	0.99	1159	116524
LcB146_contig_17	IS66	2	2.32	2700	116524
LcB146_contig_17	IS982	2	1.5	1743	116524
LcB146_contig_2	IS1182	2	15.41	4917	31911
LcB146_contig_2	IS256	1	4.35	1389	31911
LcB146_contig_20	IS256	1	2.98	1188	39799
LcB146_contig_21	IS256	1	35.91	121	337
LcB146_contig_23	IS110	1	1.95	675	34600
LcB146_contig_23	IS1182	1	5.3	1834	34600
LcB146_contig_23	IS200/IS605	1	3.85	1332	34600
LcB146_contig_23	IS256	2	7.92	2741	34600
LcB146_contig_23	IS3	2	10.19	3525	34600
LcB146_contig_23	IS30	1	3.34	1157	34600
LcB146_contig_23	IS982	1	2.98	1030	34600
LcB146_contig_24	IS200/IS605	1	1.59	1332	83898
LcB146_contig_24	IS21	1	1.6	1340	83898
LcB146_contig_24	IS256	4	5.85	4911	83898
LcB146_contig_24	IS30	1	2.09	1757	83898
LcB146_contig_24	IS982	1	1.15	965	83898
LcB146_contig_24	new	1	2.49	2088	83898
LcB146_contig_25	IS200/IS605	1	4.98	1176	23612
LcB146_contig_25	IS256	1	5.82	1374	23612
LcB146_contig_25	IS30	2	8.08	1907	23612
LcB146_contig_26	IS110	1	1.69	1176	69456
LcB146_contig_26	IS200/IS605	1	1.78	1239	69456
LcB146_contig_26	IS256	3	4.46	3096	69456
LcB146_contig_27	IS3	1	42.91	1447	3372
LcB146_contig_29	IS110	2	22.37	2236	9997
LcB146_contig_29	IS256	1	13.71	1371	9997
LcB146_contig_29	IS3	1	23.09	2308	9997
LcB146_contig_3	IS256	2	3.05	2743	89893
LcB146_contig_3	IS982	2	2.1	1890	89893
LcB146_contig_3	ISL3	1	1.62	1456	89893
LcB146_contig_30	IS256	1	38.42	1380	3592
LcB146_contig_31	IS110	1	0.21	351	163679
LcB146_contig_31	IS256	5	4.19	6860	163679
LcB146_contig_31	IS3	1	1.03	1691	163679
LcB146_contig_31	IS30	3	3.88	6345	163679
LcB146_contig_31	ISNCY	1	0.93	1522	163679
LcB146_contig_32	IS1182	1	19.15	1833	9574
LcB146_contig_32	IS256	1	6.62	634	9574
LcB146_contig_32	IS982	1	10.12	969	9574
LcB146_contig_33	IS110	1	4.21	1275	30289
LcB146_contig_33	IS256	2	9.05	2740	30289
LcB146_contig_33	IS30	1	6.09	1844	30289
LcB146_contig_34	IS1182	1	3.47	2107	60647
LcB146_contig_34	IS256	3	6.79	4116	60647
LcB146_contig_35	IS1182	1	4.79	1827	38124
LcB146_contig_35	IS30	1	3.03	1157	38124
LcB146_contig_36	IS256	2	6.68	2744	41073
LcB146_contig_36	IS982	1	2.36	969	41073
LcB146_contig_37	IS256	2	3.42	2763	80896
LcB146_contig_37	IS3	1	2.34	1894	80896
LcB146_contig_37	IS30	1	1.5	1212	80896
LcB146_contig_37	IS982	1	1.45	1170	80896
LcB146_contig_38	IS200/IS605	1	0.9	683	75757
LcB146_contig_38	IS256	2	3.62	2744	75757
LcB146_contig_38	IS66	1	0.83	628	75757
LcB146_contig_38	IS982	1	1	758	75757
LcB146_contig_39	IS1182	1	5.12	1854	36183
LcB146_contig_39	IS256	5	18.93	6849	36183
LcB146_contig_39	IS982	1	2.73	988	36183
LcB146_contig_4	IS982	1	100	263	263
LcB146_contig_40	IS256	1	60.84	1457	2395
LcB146_contig_41	IS110	1	5.3	1705	32200
LcB146_contig_41	IS256	2	8.53	2747	32200
LcB146_contig_41	IS30	1	1.18	381	32200
LcB146_contig_44	IS3	1	2.52	1899	75243
LcB146_contig_44	new	2	3.13	2352	75243
LcB146_contig_45	IS30	2	10.76	2314	21508
LcB146_contig_47	IS30	1	54.69	705	1289
LcB146_contig_48	IS1182	1	8.77	3651	41609
LcB146_contig_48	IS982	1	2.32	967	41609
LcB146_contig_49	IS1182	1	2.14	1823	85249
LcB146_contig_50	IS256	2	4.19	1889	45046
LcB146_contig_50	IS30	1	2.58	1164	45046
LcB146_contig_50	IS4	1	6.18	2783	45046
LcB146_contig_50	IS982	2	4.35	1958	45046
LcB146_contig_51	IS256	1	34.77	267	768
LcB146_contig_55	IS110	1	0.54	1275	234925
LcB146_contig_55	IS1182	2	2.45	5759	234925
LcB146_contig_55	IS256	1	0.58	1372	234925
LcB146_contig_55	IS3	1	0.79	1861	234925
LcB146_contig_55	IS30	2	1	2341	234925
LcB146_contig_55	IS982	2	0.93	2194	234925
LcB146_contig_56	IS200/IS605	1	1.31	1152	87835
LcB146_contig_56	IS256	1	1.56	1372	87835
LcB146_contig_56	IS982	1	1.1	968	87835
LcB146_contig_57	IS110	1	2.15	1204	55878
LcB146_contig_57	IS256	1	1.12	625	55878
LcB146_contig_57	IS3	1	2.88	1607	55878
LcB146_contig_57	IS982	2	3.46	1934	55878
LcB146_contig_58	IS982	1	20.66	867	4196
LcB146_contig_59	IS110	1	6.33	1816	28683
LcB146_contig_59	IS200/IS605	1	4.64	1332	28683
LcB146_contig_59	IS256	1	4.78	1372	28683
LcB146_contig_59	IS30	1	4.68	1341	28683
LcB146_contig_59	IS982	1	5.57	1599	28683
LcB146_contig_6	IS110	1	61.96	593	957
LcB146_contig_60	IS256	1	10.09	1392	13795
LcB146_contig_61	IS256	1	16.68	253	1517
LcB146_contig_61	IS30	1	77.46	1175	1517
LcB146_contig_62	IS110	1	1.26	1763	140274
LcB146_contig_62	IS1182	1	2.09	2933	140274
LcB146_contig_62	IS200/IS605	1	0.9	1269	140274
LcB146_contig_62	IS256	3	2.94	4118	140274
LcB146_contig_62	IS30	3	2.48	3482	140274
LcB146_contig_62	IS982	2	1.53	2149	140274
LcB146_contig_63	IS256	1	1.31	944	72304
LcB146_contig_63	IS3	1	2.62	1895	72304
LcB146_contig_64	IS256	2	11.15	1652	14820
LcB146_contig_64	IS30	1	7.41	1098	14820
LcB146_contig_64	IS982	2	13.02	1930	14820
LcB146_contig_65	IS256	1	0.87	272	31268
LcB146_contig_65	IS982	1	3.14	981	31268
LcB146_contig_9	IS1182	1	2.83	1839	65055
LcB146_contig_9	IS256	1	2.11	1373	65055
LcB146_contig_9	IS30	1	1.78	1157	65055
LcB146_contig_9	IS4	2	5.52	3588	65055
LcB146_contig_9	IS982	1	1.49	967	65055
LcCRI10.fna	total	178	9.68	234061	2418420

## Sheet: CRI17
# seqid	family	nIS	%Genome	bps4IS	dnaLen
LcB151_contig_1	IS1182	2	13.59	4547	33452
LcB151_contig_1	IS21	1	4.39	1470	33452
LcB151_contig_1	IS982	1	2.89	967	33452
LcB151_contig_11	IS110	1	1.9	351	18477
LcB151_contig_12	IS1182	1	100	301	301
LcB151_contig_13	IS1182	2	4.59	3678	80136
LcB151_contig_13	IS256	2	3.43	2745	80136
LcB151_contig_13	IS30	2	3.3	2644	80136
LcB151_contig_14	IS256	1	3.52	1373	38980
LcB151_contig_16	IS110	2	3.04	3343	109972
LcB151_contig_16	IS256	2	2.5	2745	109972
LcB151_contig_16	IS66	2	2.46	2700	109972
LcB151_contig_16	IS982	2	1.58	1743	109972
LcB151_contig_18	IS256	1	3.58	1524	42596
LcB151_contig_2	IS256	2	4.2	2744	65330
LcB151_contig_2	ISL3	1	2.23	1456	65330
LcB151_contig_20	IS110	1	52.94	675	1275
LcB151_contig_22	IS256	1	3.04	1378	45312
LcB151_contig_22	IS30	1	1	453	45312
LcB151_contig_22	IS5	1	1.22	552	45312
LcB151_contig_22	ISL3	1	1.32	599	45312
LcB151_contig_22	new	1	4.61	2088	45312
LcB151_contig_23	IS3	2	18.64	2491	13367
LcB151_contig_23	IS30	1	8.66	1157	13367
LcB151_contig_23	IS982	1	7.11	950	13367
LcB151_contig_24	IS982	1	100	2037	2037
LcB151_contig_25	IS982	1	32.04	960	2996
LcB151_contig_26	IS200/IS605	1	7.22	1332	18452
LcB151_contig_26	IS256	2	14.88	2746	18452
LcB151_contig_27	IS982	1	3.48	965	27754
LcB151_contig_28	IS256	1	100	253	253
LcB151_contig_29	IS21	1	6.41	1340	20894
LcB151_contig_29	IS256	2	13.78	2880	20894
LcB151_contig_29	IS30	1	6.59	1377	20894
LcB151_contig_3	IS982	1	4.07	923	22701
LcB151_contig_30	IS30	1	15.54	1171	7536
LcB151_contig_31	IS256	1	5.74	1380	24044
LcB151_contig_32	IS200/IS605	1	11.52	1176	10208
LcB151_contig_33	IS110	1	4.44	2126	47931
LcB151_contig_33	IS256	2	3.11	1490	47931
LcB151_contig_35	IS256	2	4.24	1813	42723
LcB151_contig_36	IS3	1	3.62	124	3427
LcB151_contig_36	IS982	1	8.93	306	3427
LcB151_contig_37	IS982	1	83.84	1998	2383
LcB151_contig_38	IS1182	1	37.07	1829	4934
LcB151_contig_39	IS110	1	13.34	1887	14142
LcB151_contig_39	IS256	1	3.07	434	14142
LcB151_contig_39	IS3	2	13.15	1860	14142
LcB151_contig_40	IS110	1	9.84	591	6004
LcB151_contig_40	IS3	1	10.64	639	6004
LcB151_contig_40	IS982	1	13.81	829	6004
LcB151_contig_42	IS3	1	15.93	1369	8592
LcB151_contig_43	IS256	1	66.86	232	347
LcB151_contig_44	IS30	1	87.21	1084	1243
LcB151_contig_45	IS256	4	11.01	4488	40763
LcB151_contig_45	IS30	2	10.99	4481	40763
LcB151_contig_46	ISNCY	1	64.79	1522	2349
LcB151_contig_47	IS256	1	1.39	1372	99060
LcB151_contig_49	IS1182	1	25.93	1833	7070
LcB151_contig_50	IS110	2	4.99	2479	49712
LcB151_contig_50	IS256	6	16.23	8070	49712
LcB151_contig_50	IS30	1	3.72	1851	49712
LcB151_contig_50	IS982	1	1.95	969	49712
LcB151_contig_51	IS1182	1	2.09	1848	88324
LcB151_contig_51	IS256	3	3.72	3288	88324
LcB151_contig_51	IS30	1	1.32	1164	88324
LcB151_contig_52	IS256	1	5.3	1372	25909
LcB151_contig_52	IS982	1	3.74	969	25909
LcB151_contig_53	IS1182	1	2.12	1836	86603
LcB151_contig_53	IS256	5	7.13	6178	86603
LcB151_contig_53	IS3	1	2.19	1895	86603
LcB151_contig_53	IS30	1	1.4	1212	86603
LcB151_contig_53	IS982	1	1.35	1170	86603
LcB151_contig_54	IS1182	1	2.26	1833	80987
LcB151_contig_54	IS200/IS605	1	0.84	683	80987
LcB151_contig_54	IS256	2	3.39	2744	80987
LcB151_contig_54	IS66	1	0.78	628	80987
LcB151_contig_54	IS982	2	3.56	2883	80987
LcB151_contig_55	IS110	1	1.21	675	55978
LcB151_contig_55	IS256	6	14.68	8216	55978
LcB151_contig_55	IS982	1	1.76	988	55978
LcB151_contig_56	IS256	1	46.35	1373	2962
LcB151_contig_58	IS30	1	4.88	3500	71763
LcB151_contig_59	IS30	2	10.45	2328	22271
LcB151_contig_6	IS1182	1	3.15	1827	58032
LcB151_contig_6	IS256	1	2.37	1373	58032
LcB151_contig_6	IS4	2	6.18	3588	58032
LcB151_contig_6	IS701	1	2.68	1554	58032
LcB151_contig_6	IS982	1	1.67	967	58032
LcB151_contig_60	IS110	1	0.78	1110	141995
LcB151_contig_60	IS3	1	1.32	1869	141995
LcB151_contig_60	IS982	2	1.09	1546	141995
LcB151_contig_61	IS256	1	3.16	145	4583
LcB151_contig_62	IS110	1	1.02	1275	125200
LcB151_contig_62	IS1182	1	2.32	2910	125200
LcB151_contig_62	IS256	1	1.11	1385	125200
LcB151_contig_62	IS30	1	0.94	1177	125200
LcB151_contig_62	IS982	2	1.94	2432	125200
LcB151_contig_63	IS256	1	10.51	892	8489
LcB151_contig_63	IS982	1	10.48	890	8489
LcB151_contig_64	IS1182	1	6.41	4123	64280
LcB151_contig_64	IS256	2	3.21	2066	64280
LcB151_contig_64	IS30	1	1.83	1179	64280
LcB151_contig_64	IS982	1	1.6	1028	64280
LcB151_contig_65	IS200/IS605	1	1.54	1152	74876
LcB151_contig_65	IS256	1	1.83	1367	74876
LcB151_contig_65	IS982	1	1.06	791	74876
LcB151_contig_68	IS110	1	3.45	1204	34921
LcB151_contig_68	IS256	1	1.79	625	34921
LcB151_contig_68	IS982	2	5.54	1934	34921
LcB151_contig_7	IS1182	1	6.31	1839	29140
LcB151_contig_7	IS30	1	3.97	1157	29140
LcB151_contig_7	IS4	1	5.47	1595	29140
LcB151_contig_71	IS982	1	45.37	1599	3524
LcB151_contig_72	IS110	1	4.76	1816	38116
LcB151_contig_72	IS200/IS605	1	3.49	1332	38116
LcB151_contig_72	IS256	2	7.19	2740	38116
LcB151_contig_72	IS30	1	3.07	1170	38116
LcB151_contig_73	IS256	1	10.2	1385	13584
LcB151_contig_74	IS200/IS605	1	4.22	1269	30042
LcB151_contig_74	IS256	1	4.69	1409	30042
LcB151_contig_74	IS982	1	4.37	1312	30042
LcB151_contig_75	IS30	1	4.69	1214	25874
LcB151_contig_76	IS110	1	3.34	1763	52808
LcB151_contig_76	IS200/IS605	1	2.52	1332	52808
LcB151_contig_76	IS256	1	2.6	1373	52808
LcB151_contig_76	IS30	1	2.24	1182	52808
LcB151_contig_77	IS256	1	3.6	1372	38116
LcB151_contig_77	IS30	1	3.1	1181	38116
LcB151_contig_77	IS982	1	1.65	628	38116
LcB151_contig_78	IS200/IS605	1	1.39	1332	95949
LcB151_contig_78	IS256	1	1.43	1375	95949
LcB151_contig_78	IS982	1	1.85	1771	95949
LcB151_contig_79	IS256	2	5.45	2533	46507
LcB151_contig_79	IS982	4	8.79	4090	46507
LcCRI17.fna	total	184	9.89	235851	2384332

## Sheet: BLASTn genomes
Highlighted samples: ≥ 99 % identity and ≥ 98 % coverage BASTn hits with the new IS
Genome ID	Genome Name	Organism Name	NCBI Taxon ID	Genome Status	Strain	Serovar	Biovar	Pathovar	MLST	Other Typing	Culture Collection	Type Strain	Completion Date	Publication	BioProject Accession	BioSample Accession	Assembly Accession	SRA Accession	GenBank Accessions	RefSeq Accessions	Sequencing Centers	Sequencing Status	Sequencing Platform	Sequencing Depth	Assembly Method	Chromosomes	Plasmids	Contigs	Genome Length	GC Content	PATRIC CDS	RefSeq CDS	Isolation Site	Isolation Source	Isolation Comments	Collection Date	Isolation Country	Geographic Location	Latitude	Longitude	Altitude	Depth	Other Environmental	Host Name	Host Gender	Host Age	Host Health	Body Sample Site	Body Sample Subsite
575595.3	Lactobacillus crispatus 125-2-CHN	Lactobacillus crispatus 125-2-CHN	575595	WGS	125-2-CHN								2008-08-26T00:00:00Z		PRJNA38361	SAMN02463740	GCA_000162255.1		ACPV00000000	NZ_ACPV00000000	Broad Institute	assembly	454	42.6x	Newbler v. 2.0.0-PostRelease-1/21/2009			30	2305246	36.7	2083	2082		vagina										Human, Homo sapiens				Urogenital tract; Vaginal
1381118.3	Lactobacillus crispatus 2029	Lactobacillus crispatus 2029	1381118	WGS	2029								2013-09-13T00:00:00Z		PRJNA213996	SAMN02298797	GCA_000466885.2		AVFH00000000	-	Kingston Uniiversity	WGS	IonTorrent	25.88x	IonTorrent Assembler v. 3.4.2.0			467	2397671	36.8	2822	2491		genital tract of a healthy woman		2011	Russia	Russia						Human, Homo sapiens	female
679188.3	Lactobacillus crispatus 214-1	Lactobacillus crispatus 214-1	679188	WGS	214-1								2010-03-11T00:00:00Z		PRJNA40665	SAMN00003361	GCA_000177575.1	SRR027175	ADGR00000000	NZ_ADGR00000000	J. Craig Venter Institute	assembly	454	113x				187	2068805	36.9	1902	2163		vagina										Human, Homo sapiens				Urogenital tract; Vaginal
47770.721	Lactobacillus crispatus CRI10		47770	WGS																								65	2418420	37.043	2579			vagina
47770.722	Lactobacillus crispatus CRI17		47770	WGS																								79	2384332	36.9126	2508			vagina
47770.719	Lactobacillus crispatus CRI4		47770	WGS																								100	2376268	37.0103	2507			vagina
47770.720	Lactobacillus crispatus CRI8		47770	WGS																								65	2330310	36.9728	2440			vagina
440496.3	Lactobacillus crispatus CTV-05	Lactobacillus crispatus CTV-05	440496	WGS	CTV-05								2010-10-29T00:00:00Z		PRJNA36325	SAMN02463723	GCA_000165885.1		ADML00000000	NZ_ADML00000000	Broad Institute	assembly	454	35.73x	HybridAssemble null			25	2364583	36.04	2373	2248		vagina										Human, Homo sapiens				Urogenital tract; Vaginal
1423736.3	Lactobacillus crispatus DSM 20584 = JCM 1185		1423736	WGS	JCM 1185						JCM: 1185		2015-10-01T00:00:00Z		PRJDB800	SAMD00000420	GCF_001311685.1		BBBS01000000		The University of Tokyo		Ion PGM	62x	Newbler v. 2.8			151	2033995	36.58	3536			eye									env_biome:bacteria
1423736.4	Lactobacillus crispatus DSM 20584 = JCM 1185		1423736	WGS	DSM 20584						DSM:20584		2015-11-06T00:00:00Z	26415554	PRJNA222257	SAMN02369387	GCF_001434005.1	SRR1151145	AZCW01000000		Shanghai Majorbio		Illumina MiSeq; Illumina HiSeq	100x	SOAPdenovo v. 2			150	2057071	36.58	2098	1967		eye		1970
1328863.3	Lactobacillus crispatus EM-LC1	Lactobacillus crispatus EM-LC1	1328863	WGS	EM-LC1								2013-11-15T00:00:00Z	24356836	PRJNA200566	SAMN02471465	GCA_000497065.1		AXLM00000000	-	University College Cork	WGS	Illumina HiSeq	1915.0x	Velvet v. Jan-2013			63	1829425	37	1817	1751		fecal sample	isolated from a faecal sample obtained from an elderly subject	2010	Ireland	Ireland						Human, Homo sapiens
883094.3	Lactobacillus crispatus FB049-03	Lactobacillus crispatus FB049-03	883094	WGS	FB049-03								2012-09-18T00:00:00Z		PRJNA52107	SAMN02463886	GCA_000301115.1		AGZF00000000	-	Broad Institute	WGS						100	2342850	36.9	2421	2433		vagina
883092.3	Lactobacillus crispatus FB077-07	Lactobacillus crispatus FB077-07	883092	WGS	FB077-07								2012-09-18T00:00:00Z		PRJNA52105	SAMN02463885	GCA_000301135.1		AGZG00000000	-	Broad Institute	WGS						133	2526985	36.7	2616	2643		vagina
491076.4	Lactobacillus crispatus JV-V01	Lactobacillus crispatus JV-V01	491076	WGS	JV-V01						BEI HM-103		2009-04-27T00:00:00Z		PRJNA30641	SAMN00002229	GCA_000160515.1	SRR000315,SRR011131,SRR011132	ACKR00000000	NZ_ACKR00000000	Baylor College of Medicine	assembly	454-Paired-end	60.26x	Newbler v. 1.1.03.24			86	2221719	36.9	2058	2209		vagina	Normal flora									Human, Homo sapiens				Urogenital tract; Vaginal
575596.3	Lactobacillus crispatus MV-1A-US	Lactobacillus crispatus MV-1A-US	575596	WGS	MV-1A-US								2009-08-24T00:00:00Z		PRJNA37951	SAMN02463726	GCA_000161915.2		ACOG00000000	NZ_ACOG00000000	Broad Institute	assembly	454	34.03x	Newbler v. 2.0.0-PostRelease-1/21/2009			45	2311882	36.9	2180	2151		vagina										Human, Homo sapiens				Urogenital tract; Vaginal
575597.3	Lactobacillus crispatus MV-3A-US	Lactobacillus crispatus MV-3A-US	575597	WGS	MV-3A-US								2009-10-01T00:00:00Z		PRJNA38513	SAMN02463743	GCA_000162315.1		ACQC00000000	NZ_ACQC00000000	Broad Institute	assembly	454	26.72x	Newbler 2.1-PreRelease-4/28/2009			76	2437083	36.7	2336	2330		vagina										Human, Homo sapiens				Urogenital tract; Vaginal
575598.3	Lactobacillus crispatus SJ-3C-US	Lactobacillus crispatus SJ-3C-US	575598	WGS	SJ-3C-US								2010-07-08T00:00:00Z		PRJNA224116	SAMN02463837	GCA_000176975.2		ADDT00000000	-	Broad Institute	assembly	454	39x	Newbler v. 2.1-PreRelease-4/28/2009			201	2087874	36.75	2174			vagina										Human, Homo sapiens				Urogenital tract; Vaginal
748671.3	Lactobacillus crispatus ST1	Lactobacillus crispatus ST1	748671	Complete	ST1								2010-04-22T00:00:00Z	20435723	PRJNA46813	SAMEA2272191	GCA_000091765.1		FN692037	NC_014106	Institute of Biotechnology, University of Helsinki, Finland|DNA Sequencing and Genomics lab, Institute of Biotechnology, University of Helsinki	complete				1		1	2043161	36.88	1984	2024		the crop of chickens, displays a strong protein-dependent adhesion to the epithelial cells of human vagina	isolated from the crop of chickens, displays a strong protein-dependent adhesion to the epithelial cells of human vagina									Human, Homo sapiens
47770.25	Lactobacillus crispatus strain 240_LCRI		47770	WGS	240_LCRI								2015-07-10T00:00:00Z		PRJNA267549	SAMN03197430	GCF_001063045.1	SRR1655662	JVOU01000000		University of Washington		Illumina HiSeq	29x	ABYSS v. 1.3.5			33	1796140	34.91	1731						United States	USA: WA						Human, Homo sapiens
47770.266	Lactobacillus crispatus strain AB70		47770	Complete	AB70								2018-12-27T00:00:00Z		PRJNA431864	SAMN08409124	GCA_003971565.1		CP026503,CP026504		KRIBB		PacBio	406.6x	Canu (followed by Circlator and Quiver)	1	1	2	2367925	37.2649	2457	2352		Korean vaginal fluid	isolated from Korean vaginal fluids and it has strong antimicrobial activity against vaginal pathogens	2014-11-01	South Korea	South Korea					temperature:37 degree celsius	Human, Homo sapiens
47770.64	Lactobacillus crispatus strain ATCC 33820		47770	WGS	ATCC 33820						ATCC:33820		2017-04-12T00:00:00Z		PRJNA379934	SAMN06624125	GCA_002088015.1		NARH00000000									129	2069542	36.62	2195	2061		eye
47770.733	Lactobacillus crispatus strain B4		47770	Complete	B4								2020-07-22T00:00:00Z		PRJNA645741	SAMN15516019	GCA_013456995.1		CP059140		Shanghai Jiao Tong University		Oxford Nanopore GridION	662.0x	canu v. 1.7.11	1		1	2039590	37.0175	2061	1955		gut		not collected	China	China: Shanghai,Minhang						Human, Homo sapiens
47770.589	Lactobacillus crispatus strain BIO6272		47770	WGS	BIO6272								2019-10-07T00:00:00Z		PRJNA574342	SAMN12856537	GCA_008868575.1		WBOB01000000		Bioprox		Illumina Miseq	99.8x	SPAdes v. 3.13.1			190	2061822	37.0033	2257	2124		vagina										Human, Homo sapiens
47770.42	Lactobacillus crispatus strain C037		47770	WGS	C037								2016-08-05T00:00:00Z		PRJNA316969	SAMN05244202	GCF_001700475.1		MAKH00000000		Loyola University Chicago		Illumina MiSeq	113.0x	Velvet v. 1.20.09			96	2147773	36.64	2248			Urine	isolated bacteria	17-Nov-2013	United States	USA: Maywood, IL						Human, Homo sapiens
47770.44	Lactobacillus crispatus strain C25		47770	WGS	C25								2016-08-13T00:00:00Z		PRJNA336560	SAMN05513271	GCF_001704465.1		MCJG00000000		RTI International		Illumina MiSeq	79.0x	MIRA v. 4.9.5_2			97	2341728	36.81	2451	2285		chicken gut	isolated from chicken gut	25-Mar-2013	United States	USA: North Carolina						Chicken, Gallus gallus
47770.541	Lactobacillus crispatus strain CG-12		47770	WGS	CG-12								2019-03-08T00:00:00Z		PRJNA475183	SAMN09381451	GCA_004334905.1		QKVQ01000000		The Ohio State University		Illumina	10726.0x	CLC NGS Cell v. MAY-2016			62	2042235	36.7524	2111			feces		AUG-2015	USA	USA: Wooster, Ohio						Chicken, Gallus gallus
47770.572	Lactobacillus crispatus strain CIP 104459		47770	WGS	CIP 104459						CIP 104459		2019-08-23T00:00:00Z		PRJNA557339	SAMN12395213	GCA_008079315.1		VOMA01000000		Rouen University		Illumina MiSeq	120.0x	Unicycler v. 0.4.7			124	1993673	36.7958	2088			vaginal swab		1955-01	France	France:Lyon						Human, Homo sapiens
47770.225	Lactobacillus crispatus strain CO3MRSI1		47770	Complete	CO3MRSI1								2018-11-19T00:00:00Z		PRJNA499123	SAMN10343598	GCA_003795065.1		CP033426		University of Maryland Baltimore		PacBio RSII	51.0x	Celera Assembler v. 1.7	1		1	2345902	37.0892	2351			Mid-vagina		2010	United States	USA: Baltimore						Human, Homo sapiens
47770.632	Lactobacillus crispatus strain DC21.1		47770	Complete	DC21.1						NCIMB:42771		2019-12-19T00:00:00Z		PRJNA531669	SAMN11372136	GCA_009769205.1		CP039266,CP039267		University of Nottingham		Illumina MiSeq; PacBio RSII	218.0x	CLC Genomics Workbench v. 9.5.3	1	1	2	2039404	37.0035	2051	1956		chicken		2016	United Kingdom	United Kingdom: Loughborough						Chicken, Gallus gallus
47770.138	Lactobacillus crispatus strain DISK12		47770	WGS	DISK12								2017-12-05T00:00:00Z		PRJNA342901	SAMN05770992	GCA_002811165.1		MKXG01000000		CSIR-Institute of Microbial Technology		Illumina MiSeq	205.0x	CLC NGS Cell v. 6			450	2514332	36.53	2864	2654		oral cavity		17-March-2016	India	India: Chandigarh						Human, Homo sapiens
47770.740	Lactobacillus crispatus strain DSM 29598		47770	WGS	DSM 29598						DSM:29598		2020-07-27T00:00:00Z	32687341	PRJNA615208	SAMN14448840			JAATOH010000001,JAATOH010000002,JAATOH010000003,JAATOH010000004,JAATOH010000005,JAATOH010000006,JAATOH010000007		University of Alberta		Illumina	30.0x	SPAdes v. Aug-2014			57	2289178	36.8639	2374	2250		rye sourdough		2014	Finland	Finland: Helsinki
47770.612	Lactobacillus crispatus strain FDAARGOS_743 strain Not applicable		47770	Complete	Not applicable						FDA:FDAARGOS_743		2019-12-05T00:00:00Z		PRJNA231221	SAMN11056458	GCA_009730275.1		CP046311,CP046312		US Food and Drug Administration		Pacbio; Illumina	1952.63x	SMRT v. 2.3.0, HGAP v. 3	1	1	2	2386960	37.1199	2453	2316		mid-vaginal wall			USA	USA:VA						Human, Homo sapiens	female
47770.633	Lactobacillus crispatus strain Indica1		47770	WGS	Indica1								1900-01-01T00:00:00Z		PRJNA599094	SAMN13738804			WWFE01000000		Translational Health Science and Technology Institute		454	50.0x	GS De Novo Assembler v. 2.5.3			59	1641433	37.3267	1733	1657		vagina		2016		India						Human, Homo sapiens
47770.634	Lactobacillus crispatus strain Indica2		47770	WGS	Indica2								1900-01-01T00:00:00Z		PRJNA599300	SAMN13743077			WWFF01000000		Translational Health Science and Technology Institute		Illumina MiSeq	50.0x	GS De Novo Assembler v. 2.5.3			39	2209487	36.4874	2229	2119		vagina		2016		India						Human, Homo sapiens
47770.37	Lactobacillus crispatus strain JCM 5810		47770	WGS	JCM 5810								2016-02-24T00:00:00Z		PRJNA312502	SAMN04498476	GCF_001567095.1		LSVK00000000		University of Illinois		Illumina MiSeq	750.0x	CLC Genomic Workbench v. 8.5.1			7	2048451	36.8	2046			chicken		2015-10	Japan	Japan						Chicken, Gallus gallus
47770.540	Lactobacillus crispatus strain L49		47770	WGS	L49								2019-01-22T00:00:00Z		PRJNA515573	SAMN10762134	GCA_004103355.1		SCLX01000000		Chinese Academy of Sciences		Illumina MiSeq	500.0x	Velvet v. 1.2			671	2520315	36.766	3314	2879		vaginal tract		2010	China	China: Beijing						Human, Homo sapiens
47770.574	Lactobacillus crispatus strain MGYG-HGUT-02348		47770	WGS	MGYG-HGUT-02348								2019-08-12T00:00:00Z		PRJEB33885	SAMEA5851852	GCA_902386155.1		CABMHY010000001,CABMHY010000002,CABMHY010000003,CABMHY010000004,CABMHY010000005,CABMHY010000006,CABMHY010000007		EMG							63	1829425	37.0112	1867			human gut				Ireland
47770.571	Lactobacillus crispatus strain NCK1350		47770	WGS	NCK1350								2019-07-30T00:00:00Z	31341082	PRJNA521996	SAMN10922320	GCA_007713895.1		SGWL01000000		North Carolina State University		Illumina MiSeq	90.0x	SPAdes v. 03/03/2017			42	2047345	36.8332	2127	2003		endoscopy		01-Jan-2016	USA	USA: North Carolina						Human, Homo sapiens
47770.575	Lactobacillus crispatus strain NCK1351		47770	WGS	NCK1351								2019-09-25T00:00:00Z		PRJNA563077	SAMN12667803	GCA_008694745.1		VUAT01000000		North Carolina State University		Illumina NextSeq	149.70x	SPAdes v. July-2018			547	2036562	36.9132	2478	2308		human gut		1997		USA						Human, Homo sapiens
47770.578	Lactobacillus crispatus strain NCK2487		47770	WGS	NCK2487								2019-09-25T00:00:00Z		PRJNA563077	SAMN12667804	GCA_008694775.1		VUAU01000000		North Carolina State University		Illumina NextSeq	131.37x	SPAdes v. July-2018			106	2073946	36.5816	2206	2073		feces		1990		USA						Turkey, Meleagris gallopavo
47770.576	Lactobacillus crispatus strain NCK2488		47770	WGS	NCK2488						ATCC:33820		2019-09-25T00:00:00Z		PRJNA563077	SAMN12667805	GCA_008694755.1		VUAV01000000		North Carolina State University		Illumina NextSeq	197.68x	SPAdes v. July-2018			182	2053518	36.6274	2140	2010		eye		1980		USA						Human, Homo sapiens
47770.586	Lactobacillus crispatus strain NCK777		47770	WGS	NCK777								2019-09-25T00:00:00Z		PRJNA563077	SAMN12667792	GCA_008694965.1		VUAJ01000000		North Carolina State University		Illumina NextSeq	17.03x	SPAdes v. July-2018			829	1912741	37.1139	2246	2059		eye		1995		USA
47770.587	Lactobacillus crispatus strain NCK953		47770	WGS	NCK953								2019-09-25T00:00:00Z		PRJNA563077	SAMN12667793	GCA_008694975.1		VUAK01000000		North Carolina State University		Illumina NextSeq	285.21x	SPAdes v. July-2018			126	2046505	36.7138	2131	2006		gut (lower GI)		1996		USA						Chicken, Gallus gallus
47770.588	Lactobacillus crispatus strain NCK96		47770	WGS	NCK96								2019-09-25T00:00:00Z		PRJNA563077	SAMN12667791	GCA_008694985.1		VUAI01000000		North Carolina State University		Illumina NextSeq	94.81x	SPAdes v. July-2018			125	2046304	36.7139	2131	2006		human gut		1981		USA						Human, Homo sapiens
47770.585	Lactobacillus crispatus strain NCK967		47770	WGS	NCK967								2019-09-25T00:00:00Z		PRJNA563077	SAMN12667794	GCA_008694935.1		VUAL01000000		North Carolina State University		Illumina NextSeq	304.28x	SPAdes v. July-2018			61	1924565	36.7892	1977	1872		gut (crop)		1995		USA						Chicken, Gallus gallus
47770.584	Lactobacillus crispatus strain NCK969		47770	WGS	NCK969								2019-09-25T00:00:00Z		PRJNA563077	SAMN12667795	GCA_008694925.1		VUAM01000000		North Carolina State University		Illumina NextSeq	247.07x	SPAdes v. July-2018			86	2162885	36.6058	2222	2117		gut (caecum)		1995		USA						Chicken, Gallus gallus
47770.573	Lactobacillus crispatus strain NCK971		47770	WGS	NCK971								2019-09-25T00:00:00Z		PRJNA563077	SAMN12667796	GCA_008694205.1		VYYV01000000		North Carolina State University		Illumina NextSeq	349.64x	SPAdes v. July-2018			2	2219892	36.9112	2213	2118		gut (caecum)		1995		USA						Chicken, Gallus gallus
47770.583	Lactobacillus crispatus strain NCK972		47770	WGS	NCK972								2019-09-25T00:00:00Z		PRJNA563077	SAMN12667797	GCA_008694885.1		VUAN01000000		North Carolina State University		Illumina NextSeq	349.64x	SPAdes v. July-2018			57	1919726	36.7898	1977	1876		gut (caecum)		1995		USA						Chicken, Gallus gallus
47770.581	Lactobacillus crispatus strain NCK973		47770	WGS	NCK973								2019-09-25T00:00:00Z		PRJNA563077	SAMN12667798	GCA_008694865.1		VUAO01000000		North Carolina State University		Illumina NextSeq	187.33x	SPAdes v. July-2018			74	2094575	36.6406	2162	2054		gut (caecum)		1995		USA						Chicken, Gallus gallus
47770.580	Lactobacillus crispatus strain NCK974		47770	WGS	NCK974								2019-09-25T00:00:00Z		PRJNA563077	SAMN12667799	GCA_008694845.1		VUAP01000000		North Carolina State University		Illumina NextSeq	247.74x	SPAdes v. July-2018			70	2106700	36.6431	2182	2061		gut (caecum)		1995		USA						Chicken, Gallus gallus
47770.582	Lactobacillus crispatus strain NCK977		47770	WGS	NCK977								2019-09-25T00:00:00Z		PRJNA563077	SAMN12667800	GCA_008694875.1		VUAQ01000000		North Carolina State University		Illumina NextSeq	117.86x	SPAdes v. July-2018			202	2099779	36.6436	2277	2132		gut (caecum)		1995		USA						Chicken, Gallus gallus
47770.577	Lactobacillus crispatus strain NCK978		47770	WGS	NCK978								2019-09-25T00:00:00Z		PRJNA563077	SAMN12667801	GCA_008694765.1		VUAR01000000		North Carolina State University		Illumina NextSeq	85.30x	SPAdes v. July-2018			105	2102434	36.6553	2201	2070		gut (caecum)		1995		USA						Chicken, Gallus gallus
47770.579	Lactobacillus crispatus strain NCK988		47770	WGS	NCK988								2019-09-25T00:00:00Z		PRJNA563077	SAMN12667802	GCA_008694785.1		VUAS01000000		North Carolina State University		Illumina NextSeq	306.22x	SPAdes v. July-2018			99	2187129	36.6647	2253	2140		gut (GI tract)		1995		USA						Chicken, Gallus gallus
47770.43	Lactobacillus crispatus strain OAB24-B		47770	WGS	OAB24-B								2016-08-05T00:00:00Z		PRJNA316969	SAMN05244207	GCA_001700485.1	SRR3664368	MAMR00000000		Loyola University Chicago		Illumina MiSeq	118.0x	Velvet v. 1.20.09			752	2006254	37.27	2262			Urine	isolated bacteria	22-Apr-2013	United States	USA: Maywood, IL						Human, Homo sapiens
47770.36	Lactobacillus crispatus strain PSS7772C		47770	WGS	PSS7772C								2016-02-18T00:00:00Z		PRJNA272101	SAMN03854351	GCF_001563615.1	SRR2095366	LSQY00000000		The Genome Institute at Washington University		Illumina	90x	Velvet v. 1.1.06			215	2389793	36.45	2600	2566		urine										Human, Homo sapiens
47770.557	Lactobacillus crispatus strain RL02		47770	WGS	RL02								2019-03-22T00:00:00Z		PRJNA390079	SAMN07213039	GCA_004361375.1		NKLR01000000		TNO		Illumina MiSeq	26x	SPAdes v. 3.5.0			291	2243143	36.9737	2547	2395		healthy and BV microbiomes	isolated from healthy and BV microbiomes	01-Jun-2012	Netherlands	Netherlands: Amsterdam						Human, Homo sapiens
47770.559	Lactobacillus crispatus strain RL03		47770	WGS	RL03								2019-03-22T00:00:00Z		PRJNA390079	SAMN07213108	GCA_004361385.1		NKLQ01000000		TNO		Illumina MiSeq	46x	SPAdes v. 3.5.0			330	2550531	36.9311	3034	2800		healthy and BV microbiomes	isolated from healthy and BV microbiomes	01-Jun-2012	Netherlands	Netherlands: Amsterdam						Human, Homo sapiens
47770.555	Lactobacillus crispatus strain RL05		47770	WGS	RL05								2019-03-22T00:00:00Z		PRJNA390079	SAMN07213187	GCA_004361345.1		NKLP01000000		TNO		Illumina MiSeq	25x	SPAdes v. 3.5.0			431	2577199	36.5263	2995	2786		healthy and BV microbiomes	isolated from healthy and BV microbiomes	01-Jun-2012	Netherlands	Netherlands: Amsterdam						Human, Homo sapiens
47770.569	Lactobacillus crispatus strain RL06		47770	WGS	RL06								2019-03-22T00:00:00Z		PRJNA390079	SAMN07213188	GCA_004361635.1		NKLO01000000		TNO		Illumina MiSeq	21x	SPAdes v. 3.5.0			371	2190141	36.9851	2596	2413		healthy and BV microbiomes	isolated from healthy and BV microbiomes	01-Jun-2012	Netherlands	Netherlands: Amsterdam						Human, Homo sapiens
47770.556	Lactobacillus crispatus strain RL07		47770	WGS	RL07								2019-03-22T00:00:00Z		PRJNA390079	SAMN07213189	GCA_004361355.1		NKLN01000000		TNO		Illumina MiSeq	21x	SPAdes v. 3.5.0			387	2183841	36.9863	2554	2361		healthy and BV microbiomes	isolated from healthy and BV microbiomes	01-Jun-2012	Netherlands	Netherlands: Amsterdam						Human, Homo sapiens
47770.554	Lactobacillus crispatus strain RL08		47770	WGS	RL08								2019-03-22T00:00:00Z		PRJNA390079	SAMN07213190	GCA_004361315.1		NKLM01000000		TNO		Illumina MiSeq	36x	SPAdes v. 3.5.0			364	2301145	37.108	2737	2526		healthy and BV microbiomes	isolated from healthy and BV microbiomes	01-Jun-2012	Netherlands	Netherlands: Amsterdam						Human, Homo sapiens
47770.568	Lactobacillus crispatus strain RL09		47770	WGS	RL09								2019-03-22T00:00:00Z		PRJNA390079	SAMN07213191	GCA_004361575.1		NKLL01000000		TNO		Illumina MiSeq	44x	SPAdes v. 3.5.0			289	2276697	36.9229	2637	2475		healthy and BV microbiomes	isolated from healthy and BV microbiomes	01-Jun-2012	Netherlands	Netherlands: Amsterdam						Human, Homo sapiens
47770.567	Lactobacillus crispatus strain RL10		47770	WGS	RL10								2019-03-22T00:00:00Z		PRJNA390079	SAMN07213192	GCA_004361565.1		NKLK01000000		TNO		Illumina MiSeq	29x	SPAdes v. 3.5.0			297	2315512	37.0822	2702	2511		healthy and BV microbiomes	isolated from healthy and BV microbiomes	01-Jun-2012	Netherlands	Netherlands: Amsterdam						Human, Homo sapiens
47770.553	Lactobacillus crispatus strain RL11		47770	WGS	RL11								2019-03-22T00:00:00Z		PRJNA390079	SAMN07213193	GCA_004361295.1		NKLJ01000000		TNO		Illumina MiSeq	32x	SPAdes v. 3.5.0			280	2184826	36.958	2540	2378		healthy and BV microbiomes	isolated from healthy and BV microbiomes	01-Jun-2012	Netherlands	Netherlands: Amsterdam						Human, Homo sapiens
47770.552	Lactobacillus crispatus strain RL13		47770	WGS	RL13								2019-03-22T00:00:00Z		PRJNA390079	SAMN07213194	GCA_004361265.1		NKLI01000000		TNO		Illumina MiSeq	45x	SPAdes v. 3.5.0			434	2245186	37.1526	2683	2490		healthy and BV microbiomes	isolated from healthy and BV microbiomes	01-Jun-2012	Netherlands	Netherlands: Amsterdam						Human, Homo sapiens
47770.566	Lactobacillus crispatus strain RL14		47770	WGS	RL14								2019-03-22T00:00:00Z		PRJNA390079	SAMN07213195	GCA_004361555.1		NKLH01000000		TNO		Illumina MiSeq	48x	SPAdes v. 3.5.0			375	2607418	36.8162	3119	2901		healthy and BV microbiomes	isolated from healthy and BV microbiomes	01-Jun-2012	Netherlands	Netherlands: Amsterdam						Human, Homo sapiens
47770.551	Lactobacillus crispatus strain RL15		47770	WGS	RL15								2019-03-22T00:00:00Z		PRJNA390079	SAMN07213196	GCA_004361245.1		NKLG01000000		TNO		Illumina MiSeq	40x	SPAdes v. 3.5.0			386	2327044	37.2143	2756	2577		healthy and BV microbiomes	isolated from healthy and BV microbiomes	01-Jun-2012	Netherlands	Netherlands: Amsterdam						Human, Homo sapiens
47770.565	Lactobacillus crispatus strain RL16		47770	WGS	RL16								2019-03-22T00:00:00Z		PRJNA390079	SAMN07213197	GCA_004361545.1		NKLF01000000		TNO		Illumina MiSeq	53x	SPAdes v. 3.5.0			350	2597400	36.605	3071	2827		healthy and BV microbiomes	isolated from healthy and BV microbiomes	01-Jun-2012	Netherlands	Netherlands: Amsterdam						Human, Homo sapiens
47770.550	Lactobacillus crispatus strain RL17		47770	WGS	RL17								2019-03-22T00:00:00Z		PRJNA390079	SAMN07213198	GCA_004361215.1		NKLE01000000		TNO		Illumina MiSeq	61x	SPAdes v. 3.5.0			616	2462754	38.3958	3103	2885		healthy and BV microbiomes	isolated from healthy and BV microbiomes	01-Jun-2012	Netherlands	Netherlands: Amsterdam						Human, Homo sapiens
47770.549	Lactobacillus crispatus strain RL19		47770	WGS	RL19								2019-03-22T00:00:00Z		PRJNA390079	SAMN07213199	GCA_004361205.1		NKLD01000000		TNO		Illumina MiSeq	73x	SPAdes v. 3.5.0			541	2310723	37.6808	2795	2606		healthy and BV microbiomes	isolated from healthy and BV microbiomes	01-Jun-2012	Netherlands	Netherlands: Amsterdam						Human, Homo sapiens
47770.564	Lactobacillus crispatus strain RL20		47770	WGS	RL20								2019-03-22T00:00:00Z		PRJNA390079	SAMN07213200	GCA_004361515.1		NKLC01000000		TNO		Illumina MiSeq	44x	SPAdes v. 3.5.0			359	2439235	36.5574	2875	2659		healthy and BV microbiomes	isolated from healthy and BV microbiomes	01-Jun-2012	Netherlands	Netherlands: Amsterdam						Human, Homo sapiens
47770.548	Lactobacillus crispatus strain RL21		47770	WGS	RL21								2019-03-22T00:00:00Z		PRJNA390079	SAMN07213201	GCA_004361195.1		NKLB01000000		TNO		Illumina MiSeq	83x	SPAdes v. 3.5.0			489	2569645	37.22	3101	2864		healthy and BV microbiomes	isolated from healthy and BV microbiomes	01-Jun-2012	Netherlands	Netherlands: Amsterdam						Human, Homo sapiens
47770.563	Lactobacillus crispatus strain RL23		47770	WGS	RL23								2019-03-22T00:00:00Z		PRJNA390079	SAMN07213203	GCA_004361475.1		NKLA01000000		TNO		Illumina MiSeq	45x	SPAdes v. 3.5.0			306	2327357	36.8659	2679	2523		healthy and BV microbiomes	isolated from healthy and BV microbiomes	01-Jun-2012	Netherlands	Netherlands: Amsterdam						Human, Homo sapiens
47770.547	Lactobacillus crispatus strain RL24		47770	WGS	RL24								2019-03-22T00:00:00Z		PRJNA390079	SAMN07213204	GCA_004361185.1		NKKZ01000000		TNO		Illumina MiSeq	34x	SPAdes v. 3.5.0			319	2392313	36.7616	2766	2566		healthy and BV microbiomes	isolated from healthy and BV microbiomes	01-Jun-2012	Netherlands	Netherlands: Amsterdam						Human, Homo sapiens
47770.562	Lactobacillus crispatus strain RL25		47770	WGS	RL25								2019-03-22T00:00:00Z		PRJNA390079	SAMN07213205	GCA_004361465.1		NKKY01000000		TNO		Illumina MiSeq	36x	SPAdes v. 3.5.0			313	2350093	36.9374	2710	2538		healthy and BV microbiomes	isolated from healthy and BV microbiomes	01-Jun-2012	Netherlands	Netherlands: Amsterdam						Human, Homo sapiens
47770.545	Lactobacillus crispatus strain RL26		47770	WGS	RL26								2019-03-22T00:00:00Z		PRJNA390079	SAMN07213206	GCA_004361175.1		NKKX01000000		TNO		Illumina MiSeq	54x	SPAdes v. 3.5.0			443	2274027	37.4426	2779	2578		healthy and BV microbiomes	isolated from healthy and BV microbiomes	01-Jun-2012	Netherlands	Netherlands: Amsterdam						Human, Homo sapiens
47770.560	Lactobacillus crispatus strain RL27		47770	WGS	RL27								2019-03-22T00:00:00Z		PRJNA390079	SAMN07213207	GCA_004361445.1		NKKW01000000		TNO		Illumina MiSeq	68x	SPAdes v. 3.5.0			510	2602691	37.3009	3174	2937		healthy and BV microbiomes	isolated from healthy and BV microbiomes	01-Jun-2012	Netherlands	Netherlands: Amsterdam						Human, Homo sapiens
47770.546	Lactobacillus crispatus strain RL28		47770	WGS	RL28								2019-03-22T00:00:00Z		PRJNA390079	SAMN07213208	GCA_004361125.1		NKKV01000000		TNO		Illumina MiSeq	75x	SPAdes v. 3.5.0			438	2240036	37.2961	2680	2486		healthy and BV microbiomes	isolated from healthy and BV microbiomes	01-Jun-2012	Netherlands	Netherlands: Amsterdam						Human, Homo sapiens
47770.544	Lactobacillus crispatus strain RL29		47770	WGS	RL29								2019-03-22T00:00:00Z		PRJNA390079	SAMN07213209	GCA_004361115.1		NKKU01000000		TNO		Illumina MiSeq	60x	SPAdes v. 3.5.0			401	2248310	37.1657	2694	2463		healthy and BV microbiomes	isolated from healthy and BV microbiomes	01-Jun-2012	Netherlands	Netherlands: Amsterdam						Human, Homo sapiens
47770.561	Lactobacillus crispatus strain RL30		47770	WGS	RL30								2019-03-22T00:00:00Z		PRJNA390079	SAMN07213210	GCA_004361455.1		NKKT01000000		TNO		Illumina MiSeq	59x	SPAdes v. 3.5.0			407	2322358	36.9691	2777	2597		healthy and BV microbiomes	isolated from healthy and BV microbiomes	01-Jun-2012	Netherlands	Netherlands: Amsterdam						Human, Homo sapiens
47770.543	Lactobacillus crispatus strain RL31		47770	WGS	RL31								2019-03-22T00:00:00Z		PRJNA390079	SAMN07213211	GCA_004361095.1		NKKS01000000		TNO		Illumina MiSeq	99x	SPAdes v. 3.5.0			483	2396657	37.2534	2960	2691		healthy and BV microbiomes	isolated from healthy and BV microbiomes	01-Jun-2012	Netherlands	Netherlands: Amsterdam						Human, Homo sapiens
47770.542	Lactobacillus crispatus strain RL32		47770	WGS	RL32								2019-03-22T00:00:00Z		PRJNA390079	SAMN07213212	GCA_004361075.1		NKKR01000000		TNO		Illumina MiSeq	86x	SPAdes v. 3.5.0			417	2373341	37.2959	2891	2682		healthy and BV microbiomes	isolated from healthy and BV microbiomes	01-Jun-2012	Netherlands	Netherlands: Amsterdam						Human, Homo sapiens
47770.558	Lactobacillus crispatus strain RL33		47770	WGS	RL33								2019-03-22T00:00:00Z		PRJNA390079	SAMN07213213	GCA_004361395.1		NKKQ01000000		TNO		Illumina MiSeq	71x	SPAdes v. 3.5.0			436	2401588	36.9321	2910	2641		healthy and BV microbiomes	isolated from healthy and BV microbiomes	01-Jun-2012	Netherlands	Netherlands: Amsterdam						Human, Homo sapiens
47770.181	Lactobacillus crispatus strain UMB0040		47770		UMB0040								2018-01-04T00:00:00Z		PRJNA316969	SAMN08193691	GCA_002863245.1		PKKH01000000		Loyola University Chicago		Illumina HiSeq	178.9x	Velvet v. 1.2			99			2100	1975		bladder	isolated bacteria	2015	United States	USA: Maywood, IL					env_biome:not applicable	Human, Homo sapiens
47770.178	Lactobacillus crispatus strain UMB0044		47770		UMB0044								2017-12-28T00:00:00Z		PRJNA316969	SAMN08193688	GCA_002861775.1		PKIX01000000		Loyola University Chicago		Illumina HiSeq	436.64x	Velvet v. 1.2			200			2590	2417		bladder	isolated bacteria	2015	United States	USA: Maywood, IL					env_biome:not applicable	Human, Homo sapiens
47770.182	Lactobacillus crispatus strain UMB0054		47770		UMB0054								2017-12-28T00:00:00Z		PRJNA316969	SAMN08193693	GCA_002863485.1		PKKF01000000		Loyola University Chicago		Illumina HiSeq	371.08x	Velvet v. 1.2			163			2272	2152		bladder	isolated bacteria	2015	United States	USA: Maywood, IL					env_biome:not applicable	Human, Homo sapiens
47770.180	Lactobacillus crispatus strain UMB0085		47770		UMB0085								2018-01-04T00:00:00Z		PRJNA316969	SAMN08193689	GCA_002861815.1		PKIW01000000		Loyola University Chicago		Illumina HiSeq	497.44x	Velvet v. 1.2			130			2371	2199		bladder	isolated bacteria	2015	United States	USA: Maywood, IL					env_biome:not applicable	Human, Homo sapiens
47770.177	Lactobacillus crispatus strain UMB0803		47770		UMB0803								2017-12-28T00:00:00Z		PRJNA316969	SAMN08193687	GCA_002861765.1		PKIY01000000		Loyola University Chicago		Illumina HiSeq	630.2x	Velvet v. 1.2			156			2246	2070		bladder	isolated bacteria	2015	United States	USA: Maywood, IL					env_biome:not applicable	Human, Homo sapiens
47770.179	Lactobacillus crispatus strain UMB0824		47770		UMB0824								2017-12-28T00:00:00Z		PRJNA316969	SAMN08193690	GCA_002861805.1		PKIV01000000		Loyola University Chicago		Illumina HiSeq	502.68x	Velvet v. 1.2			94			2302	2174		bladder	isolated bacteria	2015	United States	USA: Maywood, IL					env_biome:not applicable	Human, Homo sapiens
47770.704	Lactobacillus crispatus strain UMB1163		47770	WGS	UMB1163								2020-04-04T00:00:00Z		PRJNA316969	SAMN14478482			JAAUWJ010000098,JAAUWJ010000099,JAAUWJ010000100,JAAUWJ010000101,JAAUWJ010000102,JAAUWJ010000103,JAAUWJ010000104		Loyola University Chicago		Illumina NextSeq	177x	SPAdes v. 3.13.0			151	2384113	36.6566	2592	2456		bladder	isolated bacteria		USA	USA: Maywood, IL						Human, Homo sapiens
47770.183	Lactobacillus crispatus strain UMB1398		47770		UMB1398								2017-12-28T00:00:00Z		PRJNA316969	SAMN08193692	GCA_002863505.1		PKKG01000000		Loyola University Chicago		Illumina HiSeq	337.92x	Velvet v. 1.2			223			2643	2403		bladder	isolated bacteria	2015	United States	USA: Maywood, IL					env_biome:not applicable	Human, Homo sapiens
47770.67	Lactobacillus crispatus strain UMNLC1		47770	WGS	UMNLC1								2017-07-14T00:00:00Z		PRJNA312549	SAMN04498973	GCA_002218615.1		LYQR00000000		University of Minnesota		Illumina MiSeq	81.0x	CLC Genomics Workbench v. 8			69	2188265	36.91	2294	2156		ileum		2014	United States	United States						Turkey, Meleagris gallopavo
47770.75	Lactobacillus crispatus strain UMNLC10		47770	WGS	UMNLC10								2017-07-14T00:00:00Z		PRJNA312549	SAMN04498982	GCA_002218805.1		LYRA00000000		University of Minnesota		Illumina MiSeq	81.0x	CLC Genomics Workbench v. 8			54	2046138	36.87	2122	1992		ileum		2014	United States	United States						Turkey, Meleagris gallopavo
47770.76	Lactobacillus crispatus strain UMNLC11		47770	WGS	UMNLC11								2017-07-14T00:00:00Z		PRJNA312549	SAMN04498983	GCA_002218815.1		LYRB00000000		University of Minnesota		Illumina MiSeq	81.0x	CLC Genomics Workbench v. 8			73	2039742	36.97	2122	1986		ileum		2014	United States	United States						Turkey, Meleagris gallopavo
47770.78	Lactobacillus crispatus strain UMNLC12		47770	WGS	UMNLC12								2017-07-14T00:00:00Z		PRJNA312549	SAMN04498984	GCA_002218855.1		LYRC00000000		University of Minnesota		Illumina MiSeq	81.0x	CLC Genomics Workbench v. 8			59	2082133	36.86	2140	2013		ileum		2014	United States	United States						Turkey, Meleagris gallopavo
47770.77	Lactobacillus crispatus strain UMNLC13		47770	WGS	UMNLC13								2017-07-14T00:00:00Z		PRJNA312549	SAMN04498985	GCA_002218845.1		LYRD00000000		University of Minnesota		Illumina MiSeq	81.0x	CLC Genomics Workbench v. 8			110	2021204	37.03	2110	1968		ileum		2014	United States	United States						Turkey, Meleagris gallopavo
47770.79	Lactobacillus crispatus strain UMNLC14		47770	WGS	UMNLC14								2017-07-14T00:00:00Z		PRJNA312549	SAMN04498986	GCA_002218885.1		LYRE00000000		University of Minnesota		Illumina MiSeq	81.0x	CLC Genomics Workbench v. 8			81	1988281	36.98	2062	1939		ileum		2014	United States	United States						Turkey, Meleagris gallopavo
47770.80	Lactobacillus crispatus strain UMNLC15		47770	WGS	UMNLC15								2017-07-14T00:00:00Z		PRJNA312549	SAMN04498987	GCA_002218895.1		LYRF00000000		University of Minnesota		Illumina MiSeq	81.0x	CLC Genomics Workbench v. 8			81	2027947	36.91	2125	1988		ileum		2014	United States	United States						Turkey, Meleagris gallopavo
47770.81	Lactobacillus crispatus strain UMNLC16		47770	WGS	UMNLC16								2017-07-14T00:00:00Z		PRJNA312549	SAMN04498988	GCA_002218925.1		LYRG00000000		University of Minnesota		Illumina MiSeq	81.0x	CLC Genomics Workbench v. 8			56	2135057	37.06	2255	2112		ileum		2014	United States	United States						Turkey, Meleagris gallopavo
47770.82	Lactobacillus crispatus strain UMNLC18		47770	WGS	UMNLC18								2017-07-14T00:00:00Z		PRJNA312549	SAMN04498990	GCA_002218945.1		LYRH00000000		University of Minnesota		Illumina MiSeq	81.0x	CLC Genomics Workbench v. 8			76	2039767	36.77	2095	1977		ileum		2014	United States	United States						Turkey, Meleagris gallopavo
47770.83	Lactobacillus crispatus strain UMNLC19		47770	WGS	UMNLC19								2017-07-14T00:00:00Z		PRJNA312549	SAMN04498991	GCA_002218965.1		LYRI00000000		University of Minnesota		Illumina MiSeq	81.0x	CLC Genomics Workbench v. 8			75	2052874	36.77	2111	1989		ileum		2014	United States	United States						Turkey, Meleagris gallopavo
47770.66	Lactobacillus crispatus strain UMNLC2		47770	WGS	UMNLC2								2017-07-14T00:00:00Z		PRJNA312549	SAMN04498974	GCA_002218565.1		LYQS00000000		University of Minnesota		Illumina MiSeq	81.0x	CLC Genomics Workbench v. 8			73	2014377	36.88	2086	1953		ileum		2014	United States	United States						Turkey, Meleagris gallopavo
47770.84	Lactobacillus crispatus strain UMNLC20		47770	WGS	UMNLC20								2017-07-14T00:00:00Z		PRJNA312549	SAMN04498992	GCA_002218975.1		LYRJ00000000		University of Minnesota		Illumina MiSeq	81.0x	CLC Genomics Workbench v. 8			67	2041080	36.82	2105	1980		ileum		2014	United States	United States						Turkey, Meleagris gallopavo
47770.85	Lactobacillus crispatus strain UMNLC21		47770	WGS	UMNLC21								2017-07-14T00:00:00Z		PRJNA312549	SAMN04498993	GCA_002219005.1		LYRK00000000		University of Minnesota		Illumina MiSeq	81.0x	CLC Genomics Workbench v. 8			68	2037325	36.82	2109	1986		ileum		2014	United States	United States						Turkey, Meleagris gallopavo
47770.86	Lactobacillus crispatus strain UMNLC22		47770	WGS	UMNLC22								2017-07-14T00:00:00Z		PRJNA312549	SAMN04498994	GCA_002219045.1		LYRL00000000		University of Minnesota		Illumina MiSeq	81.0x	CLC Genomics Workbench v. 8			67	2046075	36.82	2118	1998		ileum		2014	United States	United States						Turkey, Meleagris gallopavo
47770.89	Lactobacillus crispatus strain UMNLC23		47770	WGS	UMNLC23								2017-07-14T00:00:00Z		PRJNA312549	SAMN04498995	GCA_002219085.1		LYRM00000000		University of Minnesota		Illumina MiSeq	81.0x	CLC Genomics Workbench v. 8			63	2042440	36.84	2099	1983		ileum		2014	United States	United States						Turkey, Meleagris gallopavo
47770.87	Lactobacillus crispatus strain UMNLC24		47770	WGS	UMNLC24								2017-07-14T00:00:00Z		PRJNA312549	SAMN04498996	GCA_002219015.1		LYRN00000000		University of Minnesota		Illumina MiSeq	81.0x	CLC Genomics Workbench v. 8			68	2048771	36.84	2121	2004		ileum		2014	United States	United States						Turkey, Meleagris gallopavo
47770.88	Lactobacillus crispatus strain UMNLC25		47770	WGS	UMNLC25								2017-07-14T00:00:00Z		PRJNA312549	SAMN04498997	GCA_002219055.1		LYRO00000000		University of Minnesota		Illumina MiSeq	81.0x	CLC Genomics Workbench v. 8			69	2049656	36.83	2135	2003		ileum		2014	United States	United States						Turkey, Meleagris gallopavo
47770.68	Lactobacillus crispatus strain UMNLC3		47770	WGS	UMNLC3								2017-07-14T00:00:00Z		PRJNA312549	SAMN04498975	GCA_002218645.1		LYQT00000000		University of Minnesota		Illumina MiSeq	81.0x	CLC Genomics Workbench v. 8			64	2018029	36.86	2093	1955		ileum		2014	United States	United States						Turkey, Meleagris gallopavo
47770.69	Lactobacillus crispatus strain UMNLC4		47770	WGS	UMNLC4								2017-07-14T00:00:00Z		PRJNA312549	SAMN04498976	GCA_002218655.1		LYQU00000000		University of Minnesota		Illumina MiSeq	81.0x	CLC Genomics Workbench v. 8			62	2019585	36.86	2098	1955		ileum		2014	United States	United States						Turkey, Meleagris gallopavo
47770.73	Lactobacillus crispatus strain UMNLC5		47770	WGS	UMNLC5								2017-07-14T00:00:00Z		PRJNA312549	SAMN04498977	GCA_002218765.1		LYQV00000000		University of Minnesota		Illumina MiSeq	81.0x	CLC Genomics Workbench v. 8			50	2013867	36.94	2086	1954		ileum		2014	United States	United States						Turkey, Meleagris gallopavo
47770.71	Lactobacillus crispatus strain UMNLC6		47770	WGS	UMNLC6								2017-07-14T00:00:00Z		PRJNA312549	SAMN04498978	GCA_002218695.1		LYQW00000000		University of Minnesota		Illumina MiSeq	81.0x	CLC Genomics Workbench v. 8			49	2046835	36.87	2128	1990		ileum		2014	United States	United States						Turkey, Meleagris gallopavo
47770.74	Lactobacillus crispatus strain UMNLC7		47770	WGS	UMNLC7								2017-07-14T00:00:00Z		PRJNA312549	SAMN04498979	GCA_002218775.1		LYQX00000000		University of Minnesota		Illumina MiSeq	81.0x	CLC Genomics Workbench v. 8			71	2103358	36.95	2200	2076		ileum		2014	United States	United States						Turkey, Meleagris gallopavo
47770.70	Lactobacillus crispatus strain UMNLC8		47770	WGS	UMNLC8								2017-07-14T00:00:00Z		PRJNA312549	SAMN04498980	GCA_002218685.1		LYQY00000000		University of Minnesota		Illumina MiSeq	81.0x	CLC Genomics Workbench v. 8			74	2054274	36.93	2153	2013		ileum		2014	United States	United States						Turkey, Meleagris gallopavo
47770.72	Lactobacillus crispatus strain UMNLC9		47770	WGS	UMNLC9								2017-07-14T00:00:00Z		PRJNA312549	SAMN04498981	GCA_002218735.1		LYQZ00000000		University of Minnesota		Illumina MiSeq	81.0x	CLC Genomics Workbench v. 8			68	1954348	37.04	2025	1903		ileum		2014	United States	United States						Turkey, Meleagris gallopavo
47770.570	Lactobacillus crispatus strain V4		47770	WGS	V4								2019-04-05T00:00:00Z		PRJNA530397	SAMN11316524	GCA_004681235.1		SRLG01000000		University of Rouen Normandie		Illumina MiSeq	138.0x	Unicycler v. 0.4.7			252	2091889	37.0217	2275			vaginal swab	isolated from a vaginal swab of a healthy non-menopaused 35 years-old French women, with a size of 2,091,889 bp and an average G+C content of 37	2018-01		France						Human, Homo sapiens		35 years
47770.693	Lactobacillus crispatus strain VA50-4AN		47770	WGS	VA50-4AN								2020-02-26T00:00:00Z		PRJNA604908	SAMN14087162			JAAJBO010000100,JAAJBO010000101,JAAJBO010000102,JAAJBO010000103,JAAJBO010000104,JAAJBO010000105,JAAJBO010000106		RCEID, Khon Kaen University		Illumina HiSeq	100.00x	SPAdes v. 3.6.2			245	2207047	36.7203	2426	2272		vagina		2015-08	Thailand	Thailand: Khon Kean						Human, Homo sapiens
47770.34	Lactobacillus crispatus strain VMC1		47770	WGS	VMC1								2016-02-02T00:00:00Z		PRJNA290636	SAMN03893599	GCF_001546015.1		LJCZ00000000		Virginia Commonwealth University		Illumina HiSeq	128.0x	Velvet v. 2.3			267	2074052	36.78	2257	2019		vaginal		2009	United States	USA: Virginia						Human, Homo sapiens
47770.35	Lactobacillus crispatus strain VMC2		47770	WGS	VMC2								2016-02-02T00:00:00Z		PRJNA290636	SAMN03893600	GCF_001546025.1		LJDA00000000		Virginia Commonwealth University		Illumina HiSeq	28.0x	CLC Bio v. 4.1			258	2201962	36.87	2461	2112		vaginal		2009	United States	USA: Virginia						Human, Homo sapiens
47770.28	Lactobacillus crispatus strain VMC3		47770	WGS	VMC3								2016-01-26T00:00:00Z	26747455	PRJNA290636	SAMN03893601	GCF_001541385.1		LJGP00000000		Virginia Commonwealth University		Illumina HiSeq	90.0x	CLC Bio v. 4.1			91	2201463	36.56	2269	2010		vaginal		2010	United States	USA: Virginia						Human, Homo sapiens
47770.29	Lactobacillus crispatus strain VMC4		47770	WGS	VMC4								2016-01-26T00:00:00Z	26747455	PRJNA290636	SAMN03893602	GCF_001541405.1		LJGQ00000000		Virginia Commonwealth University		Illumina HiSeq	207.0x	CLC Bio v. 4.1			244	2314219	36.78	2596	2295		vaginal		2010	United States	USA: Virginia						Human, Homo sapiens
47770.31	Lactobacillus crispatus strain VMC5		47770	WGS	VMC5								2016-01-26T00:00:00Z	26747455	PRJNA290636	SAMN03893603	GCF_001541515.1		LJOK00000000		Virginia Commonwealth University		Illumina GAIIx	236.0x	CLC Bio v. 4.1			259	2242963	36.91	2555	2235		vaginal		2010	United States	USA: Virginia						Human, Homo sapiens
47770.30	Lactobacillus crispatus strain VMC6		47770	WGS	VMC6								2016-01-26T00:00:00Z	26747455	PRJNA290636	SAMN03893604	GCF_001541505.1		LJOL00000000		Virginia Commonwealth University		Illumina GAIIx	215.0x	CLC Bio v. 4.1			253	2343949	36.79	2581	2293		vaginal		2010	United States	USA: Virginia						Human, Homo sapiens
47770.32	Lactobacillus crispatus strain VMC7		47770	WGS	VMC7								2016-01-26T00:00:00Z	26747455	PRJNA290636	SAMN03893605	GCF_001541535.1		LJOM00000000		Virginia Commonwealth University		Illumina GAIIx	232.0x	CLC Bio v. 4.1			247	2101584	36.63	2266	2041		vaginal		2009	United States	USA: Virginia						Human, Homo sapiens
47770.33	Lactobacillus crispatus strain VMC8		47770	WGS	VMC8								2016-01-26T00:00:00Z	26747455	PRJNA290636	SAMN03893606	GCF_001541585.1		LJON00000000		Virginia Commonwealth University		Illumina GAIIx	92.0x	CLC Bio v. 4.1			255	2332118	36.83	2567	2225		vaginal		2010	United States	USA: Virginia						Human, Homo sapiens
47770.726	Lactobacillus crispatus strain WCA-383-APC-5E		47770	WGS	WCA-383-APC-5E								2020-04-25T00:00:00Z		PRJNA561470	SAMN14558270			JABAFK010000001,JABAFK010000010,JABAFK010000011,JABAFK010000012,JABAFK010000013,JABAFK010000014,JABAFK010000015		UniKlinik RWTH Aachen		Illumina MiSeq	680x	SPAdes v. 3.6.1			54	1929316	36.8254	1941	1871		feces		03-Mar-2018		Germany						Pig, Sus scrofa
47770.692	Lactobacillus crispatus VA50-4AN		47770	WGS																								245	2207047	36.7203	2387
[truncated: 23 more columns]

## Sheet: BLASTn results
Genome	Identity	Query cover	Genome ID	Accession	Description	Product	Identity	Query cover	Subject cover	Hit from	Hit to	ALN Length	Score	E value
Lactobacillus crispatus CRI8	100	100	47770.7	47770.720.con.0047	LcB144_contig_47	LcB144_contig_47	100	100	1	156345	158432	249452	3857	0
Lactobacillus crispatus CRI8	100	100	47770.7	47770.720.con.0044	LcB144_contig_44	LcB144_contig_44	100	100	2	72465	74552	136568	3857	0
Lactobacillus crispatus CRI17	100	100	47770.7	47770.722.con.0022	LcB151_contig_22	LcB151_contig_22	100	100	5	31591	29504	45312	3851	0
Lactobacillus crispatus CRI10	100	100	47770.7	47770.721.con.0044	LcB146_contig_44	LcB146_contig_44	100	100	3	9605	11692	75243	3851	0
Lactobacillus crispatus CRI10	100	100	47770.7	47770.721.con.0024	LcB146_contig_24	LcB146_contig_24	100	100	2	78285	76198	83898	3851	0
Lactobacillus crispatus FB049-03	100	100	883094	AGZF01000100	Lactobacillus crispatus FB049-03 cont1.100, whole genome shotgun sequence.	Lactobacillus crispatus FB049-03 cont1.100, whole genome shotgun sequence.	100	100	13	3593	1506	15805	3851	0
Lactobacillus crispatus FB049-03	100	100	883094	AGZF01000069	Lactobacillus crispatus FB049-03 cont1.69, whole genome shotgun sequence.	Lactobacillus crispatus FB049-03 cont1.69, whole genome shotgun sequence.	100	100	5	26381	28468	38329	3851	0
Lactobacillus crispatus FB077-07	100	100	883092	AGZG01000129	Lactobacillus crispatus FB077-07 cont1.129, whole genome shotgun sequence.	Lactobacillus crispatus FB077-07 cont1.129, whole genome shotgun sequence.	100	100	13	3453	1366	15761	3851	0
Lactobacillus crispatus strain UMB1163	100	100	47770.7	JAAUWJ010000121	JAAUWJ010000121.1	JAAUWJ010000121.1	100	100	97	2130	43	2155	3851	0
Lactobacillus crispatus strain FDAARGOS_743 strain Not applicable	100	100	47770.6	CP046311	CP046311.1	CP046311.1	100	100	0	212624	210537	2373487	3851	0
Lactobacillus crispatus strain RL06	100	100	47770.6	NKLO01000057	NKLO01000057.1	NKLO01000057.1	100	100	10	12502	14589	21679	3851	0
Lactobacillus crispatus strain RL14	100	100	47770.6	NKLH01000050	NKLH01000050.1	NKLH01000050.1	100	100	5	39360	41447	45220	3851	0
Lactobacillus crispatus strain RL20	100	100	47770.6	NKLC01000045	NKLC01000045.1	NKLC01000045.1	100	100	97	24	2111	2153	3851	0
Lactobacillus crispatus strain RL23	100	100	47770.6	NKLA01000059	NKLA01000059.1	NKLA01000059.1	100	100	5	5206	7293	38456	3851	0
Lactobacillus crispatus strain RL07	100	100	47770.6	NKLN01000056	NKLN01000056.1	NKLN01000056.1	100	100	10	12502	14589	21799	3851	0
Lactobacillus crispatus strain RL05	100	100	47770.6	NKLP01000045	NKLP01000045.1	NKLP01000045.1	100	100	13	12401	14488	16307	3851	0
Lactobacillus crispatus strain RL08	100	100	47770.6	NKLM01000042	NKLM01000042.1	NKLM01000042.1	100	100	97	26	2113	2155	3851	0
Lactobacillus crispatus strain RL13	100	100	47770.6	NKLI01000037	NKLI01000037.1	NKLI01000037.1	100	100	12	13331	15418	16790	3851	0
Lactobacillus crispatus strain RL15	100	100	47770.6	NKLG01000030	NKLG01000030.1	NKLG01000030.1	100	100	97	24	2111	2152	3851	0
Lactobacillus crispatus strain RL19	100	100	47770.5	NKLD01000039	NKLD01000039.1	NKLD01000039.1	100	100	97	25	2112	2154	3851	0
Lactobacillus crispatus strain RL24	100	100	47770.5	NKKZ01000037	NKKZ01000037.1	NKKZ01000037.1	100	100	97	25	2112	2154	3851	0
Lactobacillus crispatus strain RL28	100	100	47770.5	NKKV01000037	NKKV01000037.1	NKKV01000037.1	100	100	12	13331	15418	16790	3851	0
Lactobacillus crispatus strain RL26	100	100	47770.5	NKKX01000048	NKKX01000048.1	NKKX01000048.1	100	100	97	25	2112	2154	3851	0
Lactobacillus crispatus strain RL29	100	100	47770.5	NKKU01000033	NKKU01000033.1	NKKU01000033.1	100	100	97	26	2113	2155	3851	0
Lactobacillus crispatus strain RL32	100	100	47770.5	NKKR01000032	NKKR01000032.1	NKKR01000032.1	100	100	97	24	2111	2157	3851	0
Lactobacillus crispatus strain PSS7772C	100	100	47770.4	KQ961642	Lactobacillus crispatus strain PSS7772C genomic scaffold Scaffold403, whole genome shotgun sequence.	Lactobacillus crispatus strain PSS7772C genomic scaffold Scaffold403, whole genome shotgun sequence.	100	100	16	10496	8409	13413	3851	0
Lactobacillus crispatus strain VMC2	100	100	47770.3	LJDA01000038	Lactobacillus crispatus strain VMC2 VMC2_v1.0_contig_38, whole genome shotgun sequence.	Lactobacillus crispatus strain VMC2 VMC2_v1.0_contig_38, whole genome shotgun sequence.	100	100	14	2254	167	14423	3851	0
Lactobacillus crispatus strain VMC8	100	100	47770.3	LJON01000013	Lactobacillus crispatus strain VMC8 VMC8_v1.0_contig_13, whole genome shotgun sequence.	Lactobacillus crispatus strain VMC8 VMC8_v1.0_contig_13, whole genome shotgun sequence.	100	100	32	3800	1713	6553	3851	0
Lactobacillus crispatus strain VMC5	100	100	47770.3	LJOK01000068	Lactobacillus crispatus strain VMC5 VMC5_v1.0_contig_68, whole genome shotgun sequence.	Lactobacillus crispatus strain VMC5 VMC5_v1.0_contig_68, whole genome shotgun sequence.	100	100	13	12234	14321	15610	3851	0
Lactobacillus crispatus strain AB70	100	100	47770.3	CP026504	CP026504.1	CP026504.1	100	100	13	7228	9315	16662	3851	0
Lactobacillus crispatus strain AB70	100	100	47770.3	CP026503	CP026503.1	CP026503.1	100	100	0	540590	538503	2351263	3851	0
Lactobacillus crispatus SJ-3C-US	100	100	575598	ADDT01000140	Lactobacillus crispatus SJ-3C-US cont1.140, whole genome shotgun sequence.	Lactobacillus crispatus SJ-3C-US cont1.140, whole genome shotgun sequence.	100	100	87	15	2102	2412	3846	0
Lactobacillus crispatus strain RL27	100	100	47770.6	NKKW01000005	NKKW01000005.1	NKKW01000005.1	100	100	6	10484	12572	33151	3846	0
Lactobacillus crispatus strain RL03	100	100	47770.6	NKLQ01000034	NKLQ01000034.1	NKLQ01000034.1	100	100	97	24	2112	2154	3846	0
Lactobacillus crispatus strain C037	100	100	47770.4	MAKH01000092	Lactobacillus crispatus strain C037 C037_Contig_92, whole genome shotgun sequence.	Lactobacillus crispatus strain C037 C037_Contig_92, whole genome shotgun sequence.	100	100	20	3812	5899	10704	3846	0
Lactobacillus crispatus strain UMB0040	100	100	47770.2	PKKH01000039	PKKH01000039.1	PKKH01000039.1	100	100	12	4018	6106	16854	3846	0
Lactobacillus crispatus strain UMB0085	100	100	47770.2	PKIW01000062	PKIW01000062.1	PKIW01000062.1	100	100	19	10217	8130	10753	3846	0
Lactobacillus crispatus CTV-05	100	100	440496	NZ_GL531750	Lactobacillus crispatus CTV-05 genomic scaffold supercont1.15, whole genome shotgun sequence.	Lactobacillus crispatus CTV-05 genomic scaffold supercont1.15, whole genome shotgun sequence.	100	100	10	12522	14609	20425	3846	0
Lactobacillus crispatus strain UMB0044	100	100	47770.2	PKIX01000002	PKIX01000002.1	PKIX01000002.1	100	100	2	39560	37473	106004	3840	0
Lactobacillus crispatus strain V4	100	100	47770.6	SRLG01000022	SRLG01000022.1	SRLG01000022.1	100	100	9	19005	21093	22579	3835	0
Lactobacillus crispatus 2029	100	100	1.38112e+06	AVFH01000060	Lactobacillus crispatus 2029 L_crispatus_2029_Contig152, whole genome shotgun sequence.	Lactobacillus crispatus 2029 L_crispatus_2029_Contig152, whole genome shotgun sequence.	100	100	39	4035	1944	5362	3833	0
Lactobacillus crispatus strain OAB24-B	100	100	47770.4	MAMR01000063	Lactobacillus crispatus strain OAB24-B OAB24B_Contig_63, whole genome shotgun sequence.	Lactobacillus crispatus strain OAB24-B OAB24B_Contig_63, whole genome shotgun sequence.	100	100	36	5217	3140	5792	3827	0
Lactobacillus crispatus strain CIP 104459	100	100	47770.6	VOMA01000097	VOMA01000097.1	VOMA01000097.1	100	100	97	2130	43	2154	3824	0
Lactobacillus crispatus strain RL25	100	100	47770.6	NKKY01000058	NKKY01000058.1	NKKY01000058.1	100	100	5	5206	7293	38456	3824	0
Lactobacillus crispatus strain RL16	100	98	47770.6	NKLF01000249	NKLF01000249.1	NKLF01000249.1	100	98	98	2086	44	2086	3768	0
Lactobacillus crispatus strain VMC6	99	100	47770.3	LJOL01000160	Lactobacillus crispatus strain VMC6 VMC6_v1.0_contig_160, whole genome shotgun sequence.	Lactobacillus crispatus strain VMC6 VMC6_v1.0_contig_160, whole genome shotgun sequence.	99	100	97	26	2095	2137	3735	0
Lactobacillus crispatus strain RL11	100	68	47770.6	NKLJ01000049	NKLJ01000049.1	NKLJ01000049.1	100	68	8	1	1423	16790	2623	0
Lactobacillus crispatus strain RL31	100	68	47770.5	NKKS01000033	NKKS01000033.1	NKKS01000033.1	100	68	97	1	1423	1469	2623	0
Lactobacillus crispatus strain RL30	100	68	47770.6	NKKT01000030	NKKT01000030.1	NKKT01000030.1	100	68	97	1	1414	1456	2607	0
Lactobacillus crispatus strain RL33	100	65	47770.6	NKKQ01000047	NKKQ01000047.1	NKKQ01000047.1	100	65	97	1	1360	1402	2507	0
Lactobacillus crispatus strain RL17	100	65	47770.6	NKLE01000031	NKLE01000031.1	NKLE01000031.1	100	65	97	1	1360	1402	2507	0
Lactobacillus crispatus strain RL21	100	65	47770.5	NKLB01000203	NKLB01000203.1	NKLB01000203.1	100	65	97	1403	43	1403	2501	0
Lactobacillus crispatus strain FDAARGOS_743 strain Not applicable	100	52	47770.6	CP046312	CP046312.1	CP046312.1	100	52	8	2190	1107	13473	2003	0
Lactobacillus crispatus strain VMC1	100	52	47770.3	LJCZ01000097	Lactobacillus crispatus strain VMC1 VMC1_v1.0_contig_97, whole genome shotgun sequence.	Lactobacillus crispatus strain VMC1 VMC1_v1.0_contig_97, whole genome shotgun sequence.	100	52	98	24	1107	1107	2003	0
Lactobacillus crispatus strain VMC1	100	49	47770.3	LJCZ01000238	Lactobacillus crispatus strain VMC1 VMC1_v1.0_contig_238, whole genome shotgun sequence.	Lactobacillus crispatus strain VMC1 VMC1_v1.0_contig_238, whole genome shotgun sequence.	100	49	96	1	1024	1066	1887	0
Lactobacillus crispatus strain RL30	100	31	47770.6	NKKT01000164	NKKT01000164.1	NKKT01000164.1	100	31	96	26	673	673	1198	0
Lactobacillus crispatus strain RL33	100	31	47770.6	NKKQ01000249	NKKQ01000249.1	NKKQ01000249.1	100	31	96	25	672	672	1198	0
Lactobacillus crispatus strain RL17	100	31	47770.6	NKLE01000350	NKLE01000350.1	NKLE01000350.1	100	31	96	26	673	673	1198	0
Lactobacillus crispatus strain RL21	100	31	47770.5	NKLB01000350	NKLB01000350.1	NKLB01000350.1	100	31	97	24	671	671	1198	0
Lactobacillus crispatus strain RL31	100	31	47770.5	NKKS01000219	NKKS01000219.1	NKKS01000219.1	100	31	97	24	671	671	1198	0
Lactobacillus crispatus strain RL09	99	27	47770.6	NKLL01000271	NKLL01000271.1	NKLL01000271.1	99	27	89	630	68	630	1002	0
Lactobacillus crispatus strain RL09	96	20	47770.6	NKLL01000178	NKLL01000178.1	NKLL01000178.1	96	20	89	466	50	466	671	0
Lactobacillus crispatus strain RL16	85	32	47770.6	NKLF01000041	NKLF01000041.1	NKLF01000041.1	85	32	2	23505	24167	34019	659	0
Lactobacillus crispatus strain ATCC 33820	85	32	47770.6	NARH01000006	NARH01000006.1	NARH01000006.1	85	32	1	1103	441	62311	653	0
Lactobacillus crispatus strain NCK96	85	32	47770.6	VUAI01000085	VUAI01000085.1	VUAI01000085.1	85	32	30	1492	2154	2229	653	0
Lactobacillus crispatus strain NCK953	85	32	47770.6	VUAK01000085	VUAK01000085.1	VUAK01000085.1	85	32	30	1492	2154	2229	653	0
Lactobacillus crispatus strain NCK777	85	32	47770.6	VUAJ01000101	VUAJ01000101.1	VUAJ01000101.1	85	32	13	1001	339	5095	653	0
Lactobacillus crispatus strain NCK2488	85	32	47770.6	VUAV01000004	VUAV01000004.1	VUAV01000004.1	85	32	1	1342	680	62478	653	0
Lactobacillus crispatus strain C037	85	32	47770.4	MAKH01000064	Lactobacillus crispatus strain C037 C037_Contig_64, whole genome shotgun sequence.	Lactobacillus crispatus strain C037 C037_Contig_64, whole genome shotgun sequence.	85	32	1	26794	26132	57885	653	0
Lactobacillus crispatus strain UMB0040	85	32	47770.2	PKKH01000006	PKKH01000006.1	PKKH01000006.1	85	32	1	26804	26142	64524	653	0
Lactobacillus crispatus strain UMB0085	85	32	47770.2	PKIW01000006	PKIW01000006.1	PKIW01000006.1	85	32	1	26881	26219	58056	653	0
Lactobacillus crispatus DSM 20584 = JCM 1185	85	32	1.42374e+06	AZCW01000006	Lactobacillus crispatus DSM 20584 = JCM 1185 strain DSM 20584 Scaffold6, whole genome shotgun sequence.	Lactobacillus crispatus DSM 20584 = JCM 1185 strain DSM 20584 Scaffold6, whole genome shotgun sequence.	85	32	1	61162	61824	62191	653	0
Lactobacillus crispatus DSM 20584 = JCM 1185	84	32	1.42374e+06	BBBS01000004	Lactobacillus crispatus DSM 20584 = JCM 1185 DNA, contig: JCM1185.contig00004, whole genome shotgun sequence.	Lactobacillus crispatus DSM 20584 = JCM 1185 DNA, contig: JCM1185.contig00004, whole genome shotgun sequence.	84	32	1	959	296	62145	647	0
Lactobacillus crispatus strain RL31	100	16	47770.5	NKKS01000452	NKKS01000452.1	NKKS01000452.1	100	16	100	1	339	339	627	9e-178
Lactobacillus crispatus strain UMNLC19	84	32	47770.8	LYRI01000014	LYRI01000014.1	LYRI01000014.1	84	32	1	15994	16656	82651	625	3e-177
Lactobacillus crispatus strain UMNLC18	84	32	47770.8	LYRH01000002	LYRH01000002.1	LYRH01000002.1	84	32	1	52583	51921	68360	625	3e-177
Lactobacillus crispatus strain UMNLC16	84	32	47770.8	LYRG01000024	LYRG01000024.1	LYRG01000024.1	84	32	2	18144	18806	34662	625	3e-177
Lactobacillus crispatus strain UMNLC15	84	32	47770.8	LYRF01000065	LYRF01000065.1	LYRF01000065.1	84	32	1	16283	16945	73228	625	3e-177
Lactobacillus crispatus strain UMNLC14	84	32	47770.8	LYRE01000019	LYRE01000019.1	LYRE01000019.1	84	32	0	17998	18660	134634	625	3e-177
Lactobacillus crispatus strain UMNLC12	84	32	47770.8	LYRC01000052	LYRC01000052.1	LYRC01000052.1	84	32	0	18686	19348	172833	625	3e-177
Lactobacillus crispatus strain UMNLC13	84	32	47770.8	LYRD01000104	LYRD01000104.1	LYRD01000104.1	84	32	3	7218	6556	21638	625	3e-177
Lactobacillus crispatus strain UMNLC11	84	32	47770.8	LYRB01000014	LYRB01000014.1	LYRB01000014.1	84	32	3	7218	6556	21638	625	3e-177
Lactobacillus crispatus strain UMNLC10	84	32	47770.8	LYRA01000001	LYRA01000001.1	LYRA01000001.1	84	32	0	18240	18902	369570	625	3e-177
Lactobacillus crispatus strain UMNLC7	84	32	47770.7	LYQX01000047	LYQX01000047.1	LYQX01000047.1	84	32	1	36451	37113	52969	625	3e-177
Lactobacillus crispatus strain UMNLC5	84	32	47770.7	LYQV01000004	LYQV01000004.1	LYQV01000004.1	84	32	1	36081	36743	83260	625	3e-177
Lactobacillus crispatus strain UMNLC9	84	32	47770.7	LYQZ01000037	LYQZ01000037.1	LYQZ01000037.1	84	32	2	16035	16697	37134	625	3e-177
Lactobacillus crispatus strain UMNLC6	84	32	47770.7	LYQW01000048	LYQW01000048.1	LYQW01000048.1	84	32	0	17998	18660	179399	625	3e-177
Lactobacillus crispatus strain UMNLC8	84	32	47770.7	LYQY01000035	LYQY01000035.1	LYQY01000035.1	84	32	3	7218	6556	21638	625	3e-177
Lactobacillus crispatus strain UMNLC4	84	32	47770.7	LYQU01000024	LYQU01000024.1	LYQU01000024.1	84	32	1	53217	52555	85389	625	3e-177
Lactobacillus crispatus strain UMNLC3	84	32	47770.7	LYQT01000001	LYQT01000001.1	LYQT01000001.1	84	32	1	53217	52555	85389	625	3e-177
Lactobacillus crispatus strain UMNLC1	84	32	47770.7	LYQR01000005	LYQR01000005.1	LYQR01000005.1	84	32	0	154807	154145	171031	625	3e-177
Lactobacillus crispatus strain UMNLC2	84	32	47770.7	LYQS01000018	LYQS01000018.1	LYQS01000018.1	84	32	1	32173	32835	85417	625	3e-177
Lactobacillus crispatus ST1	84	32	748671	NC_014106	Lactobacillus crispatus ST1, complete genome.	Lactobacillus crispatus ST1, complete genome.	84	32	0	486649	487311	2043161	620	1e-175
Lactobacillus crispatus strain RL33	100	16	47770.6	NKKQ01000307	NKKQ01000307.1	NKKQ01000307.1	100	16	100	334	1	334	618	5e-175
Lactobacillus crispatus strain RL17	100	16	47770.6	NKLE01000186	NKLE01000186.1	NKLE01000186.1	100	16	100	334	1	334	618	5e-175
Lactobacillus crispatus strain RL21	100	16	47770.5	NKLB01000466	NKLB01000466.1	NKLB01000466.1	100	16	100	334	1	334	618	5e-175
Lactobacillus crispatus strain RL02	97	18	47770.6	NKLR01000213	NKLR01000213.1	NKLR01000213.1	97	18	68	2	367	538	611	9e-173
Lactobacillus crispatus strain RL31	99	16	47770.5	NKKS01000442	NKKS01000442.1	NKKS01000442.1	99	16	99	1	336	339	611	9e-173
Lactobacillus crispatus strain RL30	100	16	47770.6	NKKT01000345	NKKT01000345.1	NKKT01000345.1	100	16	100	329	1	329	609	3e-172
Lactobacillus crispatus strain OAB24-B	82	32	47770.4	MAMR01000339	Lactobacillus crispatus strain OAB24-B OAB24B_Contig_339, whole genome shotgun sequence.	Lactobacillus crispatus strain OAB24-B OAB24B_Contig_339, whole genome shotgun sequence.	82	32	31	672	1	2135	566	2e-159
Lactobacillus crispatus strain RL30	100	13	47770.6	NKKT01000364	NKKT01000364.1	NKKT01000364.1	100	13	100	280	1	280	518	5e-145
Lactobacillus crispatus strain VMC8	100	13	47770.3	LJON01000241	Lactobacillus crispatus strain VMC8 VMC8_v1.0_contig_241, whole genome shotgun sequence.	Lactobacillus crispatus strain VMC8 VMC8_v1.0_contig_241, whole genome shotgun sequence.	100	13	87	316	43	316	507	1e-141
Lactobacillus crispatus strain RL31	100	13	47770.5	NKKS01000200	NKKS01000200.1	NKKS01000200.1	100	13	100	271	1	271	502	5e-140
Lactobacillus crispatus strain RL17	98	13	47770.6	NKLE01000381	NKLE01000381.1	NKLE01000381.1	98	13	100	1	264	264	466	2e-129
Lactobacillus crispatus SJ-3C-US	100	12	575598	ADDT01000139	Lactobacillus crispatus SJ-3C-US cont1.139, whole genome shotgun sequence.	Lactobacillus crispatus SJ-3C-US cont1.139, whole genome shotgun sequence.	100	12	4	6532	6779	6779	459	3e-127
Lactobacillus crispatus SJ-3C-US	100	12	575598	ADDT01000138	Lactobacillus crispatus SJ-3C-US cont1.138, whole genome shotgun sequence.	Lactobacillus crispatus SJ-3C-US cont1.138, whole genome shotgun sequence.	100	12	4	5901	5654	5901	459	3e-127
Lactobacillus crispatus strain RL09	100	12	47770.6	NKLL01000152	NKLL01000152.1	NKLL01000152.1	100	12	65	1	248	381	459	3e-127
Lactobacillus crispatus strain RL17	100	12	47770.6	NKLE01000166	NKLE01000166.1	NKLE01000166.1	100	12	100	251	1	251	459	3e-127
Lactobacillus crispatus strain RL17	100	12	47770.6	NKLE01000359	NKLE01000359.1	NKLE01000359.1	100	12	100	1	246	246	450	2e-124
Lactobacillus crispatus strain RL21	99	12	47770.5	NKLB01000187	NKLB01000187.1	NKLB01000187.1	99	12	100	251	1	251	448	7e-124
Lactobacillus crispatus MV-1A-US	80	28	575596	NZ_GG698830	Lactobacillus crispatus MV-1A-US genomic scaffold supercont1.4, whole genome shotgun sequence.	Lactobacillus crispatus MV-1A-US genomic scaffold supercont1.4, whole genome shotgun sequence.	80	28	0	152339	152934	320795	446	2e-123
Lactobacillus crispatus JV-V01	80	28	491076	NZ_GG669817	Lactobacillus crispatus JV-V01 genomic scaffold SCAFFOLD4, whole genome shotgun sequence.	Lactobacillus crispatus JV-V01 genomic scaffold SCAFFOLD4, whole genome shotgun sequence.	80	28	0	117574	116979	272794	446	2e-123
Lactobacillus crispatus strain UMB1163	80	28	47770.7	JAAUWJ010000099	JAAUWJ010000099.1	JAAUWJ010000099.1	80	28	8	4528	5123	7595	446	2e-123
Lactobacillus crispatus strain PSS7772C	80	28	47770.4	KQ961499	Lactobacillus crispatus strain PSS7772C genomic scaffold Scaffold10, whole genome shotgun sequence.	Lactobacillus crispatus strain PSS7772C genomic scaffold Scaffold10, whole genome shotgun sequence.	80	28	27	1543	2138	2201	446	2e-123
Lactobacillus crispatus strain VMC8	80	28	47770.3	LJON01000081	Lactobacillus crispatus strain VMC8 VMC8_v1.0_contig_81, whole genome shotgun sequence.	Lactobacillus crispatus strain VMC8 VMC8_v1.0_contig_81, whole genome shotgun sequence.	80	28	2	4421	5016	35612	446	2e-123
Lactobacillus crispatus strain VMC4	80	28	47770.3	LJGQ01000030	Lactobacillus crispatus strain VMC4 VMC4_v1.0_contig_30, whole genome shotgun sequence.	Lactobacillus crispatus strain VMC4 VMC4_v1.0_contig_30, whole genome shotgun sequence.	80	28	1	8436	9031	44108	446	2e-123
Lactobacillus crispatus SJ-3C-US	100	11	575598	ADDT01000113	Lactobacillus crispatus SJ-3C-US cont1.113, whole genome shotgun sequence.	Lactobacillus crispatus SJ-3C-US cont1.113, whole genome shotgun sequence.	100	11	2	1	240	12103	444	9e-123
Lactobacillus crispatus strain RL21	99	12	47770.5	NKLB01000268	NKLB01000268.1	NKLB01000268.1	99	12	100	1	246	246	444	9e-123
Lactobacillus crispatus CRI4	80	28	47770.7	47770.719.con.0063	LcB143_contig_67	LcB143_contig_67	80	28	1	41842	41247	50669	441	1e-121
Lactobacillus crispatus MV-3A-US	80	28	575597	NZ_GG704610	Lactobacillus crispatus MV-3A-US genomic scaffold supercont1.5, whole genome shotgun sequence.	Lactobacillus crispatus MV-3A-US genomic scaffold supercont1.5, whole genome shotgun sequence.	80	28	0	164733	164138	208681	441	1e-121
Lactobacillus crispatus strain L49	80	28	47770.5	SCLX01000004	SCLX01000004.1	SCLX01000004.1	80	28	1	41415	40820	51582	441	1e-121
Lactobacillus crispatus strain UMB1398	80	28	47770.2	PKKG01000007	PKKG01000007.1	PKKG01000007.1	80	28	2	28761	28166	38878	441	1e-121
Lactobacillus crispatus strain RL17	99	11	47770.6	NKLE01000210	NKLE01000210.1	NKLE01000210.1	99	11	100	1	239	239	431	7e-119
Lactobacillus crispatus SJ-3C-US	100	11	575598	ADDT01000112	Lactobacillus crispatus SJ-3C-US cont1.112, whole genome shotgun sequence.	Lactobacillus crispatus SJ-3C-US cont1.112, whole genome shotgun sequence.	100	11	6	1	230	3997	426	3e-117
Lactobacillus crispatus strain RL30	100	11	47770.6	NKKT01000393	NKKT01000393.1	NKKT01000393.1	100	11	100	230	1	230	426	3e-117
Lactobacillus crispatus strain RL33	99	11	47770.6	NKKQ01000332	NKKQ01000332.1	NKKQ01000332.1	99	11	100	239	1	239	426	3e-117
Lactobacillus crispatus strain RL21	99	11	47770.5	NKLB01000178	NKLB01000178.1	NKLB01000178.1	99	11	100	239	1	239	426	3e-117
Lactobacillus crispatus strain RL30	99	11	47770.6	NKKT01000389	NKKT01000389.1	NKKT01000389.1	99	11	100	1	236	236	420	1e-115
Lactobacillus crispatus strain RL30	98	12	47770.6	NKKT01000200	NKKT01000200.1	NKKT01000200.1	98	12	98	1	242	246	420	1e-115
Lactobacillus crispatus strain RL17	98	11	47770.6	NKLE01000162	NKLE01000162.1	NKLE01000162.1	98	11	100	239	1	239	420	1e-115
Lactobacillus crispatus strain RL21	100	11	47770.5	NKLB01000209	NKLB01000209.1	NKLB01000209.1	100	11	100	1	230	230	420	1e-115
Lactobacillus crispatus strain RL17	98	12	47770.6	NKLE01000369	NKLE01000369.1	NKLE01000369.1	98	12	100	1	243	243	417	2e-114
Lactobacillus crispatus strain RL30	99	11	47770.6	NKKT01000372	NKKT01000372.1	NKKT01000372.1	99	11	100	230	1	230	415	7e-114
Lactobacillus crispatus strain RL33	98	11	47770.6	NKKQ01000426	NKKQ01000426.1	NKKQ01000426.1	98	11	100	1	239	239	415	7e-114
Lactobacillus crispatus strain VMC6	100	11	47770.3	LJOL01000031	Lactobacillus crispatus strain VMC6 VMC6_v1.0_contig_31, whole genome shotgun sequence.	Lactobacillus crispatus strain VMC6 VMC6_v1.0_contig_31, whole genome shotgun sequence.	100	11	2	224	1	14394	415	7e-114
Lactobacillus crispatus strain RL21	98	11	47770.5	NKLB01000447	NKLB01000447.1	NKLB01000447.1	98	11	100	234	1	234	411	1e-112
Lactobacillus crispatus SJ-3C-US	100	11	575598	ADDT01000111	Lactobacillus crispatus SJ-3C-US cont1.111, whole genome shotgun sequence.	Lactobacillus crispatus SJ-3C-US cont1.111, whole genome shotgun sequence.	100	11	7	3051	3275	3275	409	3e-112
Lactobacillus crispatus strain RL30	99	11	47770.6	NKKT01000396	NKKT01000396.1	NKKT01000396.1	99	11	100	227	1	227	409	3e-112
Lactobacillus crispatus strain RL30	100	11	47770.6	NKKT01000399	NKKT01000399.1	NKKT01000399.1	100	11	100	220	1	220	402	6e-110
Lactobacillus crispatus strain RL21	98	11	47770.5	NKLB01000174	NKLB01000174.1	NKLB01000174.1	98	11	100	230	1	230	398	7e-109
Lactobacillus crispatus strain RL30	98	10	47770.6	NKKT01000400	NKKT01000400.1	NKKT01000400.1	98	10	100	1	217	217	374	1e-101
Lactobacillus crispatus strain RL16	100	8	47770.6	NKLF01000252	NKLF01000252.1	NKLF01000252.1	100	8	2	172	1	7769	319	6e-85
Lactobacillus crispatus strain RL16	99	8	47770.6	NKLF01000227	NKLF01000227.1	NKLF01000227.1	99	8	2	7327	7499	7499	313	2e-83
Lactobacillus crispatus CRI8	100	7	47770.7	47770.720.con.0048	LcB144_contig_48	LcB144_contig_48	100	7	3	4637	4774	4774	256	4e-66
Lactobacillus crispatus CRI10	100	5	47770.7	47770.721.con.0042	LcB146_contig_42	LcB146_contig_42	100	5	0	36958	36847	36958	208	1e-51
Lactobacillus crispatus CRI17	100	5	47770.7	47770.722.con.0021	LcB151_contig_21	LcB151_contig_21	100	5	11	979	872	979	201	2e-49
Lactobacillus crispatus strain RL20	100	5	47770.6	NKLC01000337	NKLC01000337.1	NKLC01000337.1	100	5	4	2775	2878	2878	193	3e-47
Lactobacillus crispatus strain RL20	100	5	47770.6	NKLC01000287	NKLC01000287.1	NKLC01000287.1	100	5	1	7598	7701	7701	193	3e-47
Lactobacillus crispatus strain RL03	100	5	47770.6	NKLQ01000277	NKLQ01000277.1	NKLQ01000277.1	100	5	1	12401	12504	12504	193	3e-47
Lactobacillus crispatus strain RL03	100	5	47770.6	NKLQ01000005	NKLQ01000005.1	NKLQ01000005.1	100	5	1	11026	11129	11129	193	3e-47
Lactobacillus crispatus strain RL15	100	5	47770.6	NKLG01000293	NKLG01000293.1	NKLG01000293.1	100	5	2	104	1	6456	193	3e-47
Lactobacillus crispatus strain RL15	100	5	47770.6	NKLG01000150	NKLG01000150.1	NKLG01000150.1	100	5	0	48834	48937	48937	193	3e-47
Lactobacillus crispatus strain RL21	100	5	47770.5	NKLB01000405	NKLB01000405.1	NKLB01000405.1	100	5	1	12401	12504	12504	193	3e-47
Lactobacillus crispatus strain RL21	100	5	47770.5	NKLB01000005	NKLB01000005.1	NKLB01000005.1	100	5	1	10791	10894	10894	193	3e-47
Lactobacillus crispatus strain RL31	100	5	47770.5	NKKS01000227	NKKS01000227.1	NKKS01000227.1	100	5	1	12401	12504	12504	193	3e-47
Lactobacillus crispatus strain RL32	100	5	47770.5	NKKR01000214	NKKR01000214.1	NKKR01000214.1	100	5	1	12401	12504	12504	193	3e-47
Lactobacillus crispatus strain RL32	100	5	47770.5	NKKR01000005	NKKR01000005.1	NKKR01000005.1	100	5	1	19551	19654	19654	193	3e-47
Lactobacillus crispatus strain RL33	100	5	47770.6	NKKQ01000060	NKKQ01000060.1	NKKQ01000060.1	100	5	0	33682	33784	33784	191	1e-46
Lactobacillus crispatus strain RL33	100	5	47770.6	NKKQ01000037	NKKQ01000037.1	NKKQ01000037.1	100	5	1	103	1	12654	191	1e-46
Lactobacillus crispatus strain RL19	100	5	47770.5	NKLD01000455	NKLD01000455.1	NKLD01000455.1	100	5	23	103	1	444	191	1e-46
Lactobacillus crispatus strain RL19	100	5	47770.5	NKLD01000038	NKLD01000038.1	NKLD01000038.1	100	5	1	103	1	12654	191	1e-46
Lactobacillus crispatus strain RL24	100	5	47770.5	NKKZ01000228	NKKZ01000228.1	NKKZ01000228.1	100	5	17	103	1	600	191	1e-46
Lactobacillus crispatus strain RL24	100	5	47770.5	NKKZ01000040	NKKZ01000040.1	NKKZ01000040.1	100	5	1	103	1	12654	191	1e-46
Lactobacillus crispatus strain RL26	100	5	47770.5	NKKX01000186	NKKX01000186.1	NKKX01000186.1	100	5	17	498	600	600	191	1e-46
Lactobacillus crispatus strain RL26	100	5	47770.5	NKKX01000109	NKKX01000109.1	NKKX01000109.1	100	5	0	103	1	43808	191	1e-46
Lactobacillus crispatus strain RL26	100	5	47770.5	NKKX01000038	NKKX01000038.1	NKKX01000038.1	100	5	1	103	1	12550	191	1e-46
Lactobacillus crispatus strain RL31	100	5	47770.5	NKKS01000005	NKKS01000005.1	NKKS01000005.1	100	5	1	19550	19652	19653	191	1e-46
Lactobacillus crispatus strain UMB1163	100	5	47770.7	JAAUWJ010000060	JAAUWJ010000060.1	JAAUWJ010000060.1	100	5	1	14660	14761	14761	189	5e-46
Lactobacillus crispatus strain RL33	100	5	47770.6	NKKQ01000237	NKKQ01000237.1	NKKQ01000237.1	100	5	23	342	443	443	189	5e-46
Lactobacillus crispatus strain RL29	100	5	47770.5	NKKU01000380	NKKU01000380.1	NKKU01000380.1	100	5	10	935	1036	1036	189	5e-46
Lactobacillus crispatus strain RL29	100	5	47770.5	NKKU01000297	NKKU01000297.1	NKKU01000297.1	100	5	2	6375	6476	6476	189	5e-46
Lactobacillus crispatus strain RL33	100	5	47770.6	NKKQ01000405	NKKQ01000405.1	NKKQ01000405.1	100	5	33	205	305	305	188	1e-45
Lactobacillus crispatus strain RL29	100	5	47770.5	NKKU01000308	NKKU01000308.1	NKKU01000308.1	100	5	33	205	305	305	188	1e-45
Lactobacillus crispatus strain OAB24-B	92	6	47770.4	MAMR01000273	Lactobacillus crispatus strain OAB24-B OAB24B_Contig_273, whole genome shotgun sequence.	Lactobacillus crispatus strain OAB24-B OAB24B_Contig_273, whole genome shotgun sequence.	92	6	5	1	135	2721	188	1e-45
Lactobacillus crispatus strain RL15	100	5	47770.6	NKLG01000191	NKLG01000191.1	NKLG01000191.1	100	5	38	150	246	254	180	3e-43
Lactobacillus crispatus strain UMB1163	100	5	47770.7	JAAUWJ010000088	JAAUWJ010000088.1	JAAUWJ010000088.1	100	5	1	9177	9270	9270	175	1e-41
Lactobacillus crispatus strain RL06	100	4	47770.6	NKLO01000300	NKLO01000300.1	NKLO01000300.1	100	4	4	1	86	2422	160	4e-37
Lactobacillus crispatus strain RL07	100	4	47770.6	NKLN01000335	NKLN01000335.1	NKLN01000335.1	100	4	2	1	86	3684	160	4e-37
Lactobacillus crispatus strain RL15	100	4	47770.6	NKLG01000263	NKLG01000263.1	NKLG01000263.1	100	4	34	1	86	253	160	4e-37
Lactobacillus crispatus strain RL15	100	4	47770.6	NKLG01000097	NKLG01000097.1	NKLG01000097.1	100	4	0	1	86	64831	160	4e-37
Lactobacillus crispatus strain UMB1163	100	4	47770.7	JAAUWJ010000102	JAAUWJ010000102.1	JAAUWJ010000102.1	100	4	1	1	85	6881	158	1e-36
Lactobacillus crispatus strain UMB1163	100	4	47770.7	JAAUWJ010000037	JAAUWJ010000037.1	JAAUWJ010000037.1	100	4	0	21012	20928	21012	158	1e-36
Lactobacillus crispatus strain RL20	100	4	47770.6	NKLC01000358	NKLC01000358.1	NKLC01000358.1	100	4	6	1482	1398	1482	158	1e-36
Lactobacillus crispatus strain RL20	100	4	47770.6	NKLC01000284	NKLC01000284.1	NKLC01000284.1	100	4	0	40952	40868	40952	158	1e-36
Lactobacillus crispatus strain RL30	100	4	47770.6	NKKT01000262	NKKT01000262.1	NKKT01000262.1	100	4	1	1	85	6131	158	1e-36
Lactobacillus crispatus strain RL30	100	4	47770.6	NKKT01000180	NKKT01000180.1	NKKT01000180.1	100	4	6	1482	1398	1482	158	1e-36
Lactobacillus crispatus strain RL03	100	4	47770.6	NKLQ01000325	NKLQ01000325.1	NKLQ01000325.1	100	4	6	1482	1398	1482	158	1e-36
Lactobacillus crispatus strain RL03	100	4	47770.6	NKLQ01000006	NKLQ01000006.1	NKLQ01000006.1	100	4	0	1	85	20664	158	1e-36
Lactobacillus crispatus strain RL33	100	4	47770.6	NKKQ01000358	NKKQ01000358.1	NKKQ01000358.1	100	4	6	1	85	1482	158	1e-36
Lactobacillus crispatus strain RL33	100	4	47770.6	NKKQ01000270	NKKQ01000270.1	NKKQ01000270.1	100	4	0	1	85	24975	158	1e-36
Lactobacillus crispatus strain RL33	100	4	47770.6	NKKQ01000036	NKKQ01000036.1	NKKQ01000036.1	100	4	1	12702	12618	12702	158	1e-36
Lactobacillus crispatus strain RL08	100	4	47770.6	NKLM01000339	NKLM01000339.1	NKLM01000339.1	100	4	6	1482	1398	1482	158	1e-36
Lactobacillus crispatus strain RL08	100	4	47770.6	NKLM01000287	NKLM01000287.1	NKLM01000287.1	100	4	1	1	85	6131	158	1e-36
Lactobacillus crispatus strain RL15	100	4	47770.6	NKLG01000249	NKLG01000249.1	NKLG01000249.1	100	4	1	6069	5985	6069	158	1e-36
Lactobacillus crispatus strain RL17	100	4	47770.6	NKLE01000429	NKLE01000429.1	NKLE01000429.1	100	4	6	1482	1398	1482	158	1e-36
Lactobacillus crispatus strain RL17	100	4	47770.6	NKLE01000349	NKLE01000349.1	NKLE01000349.1	100	4	1	6069	5985	6069	158	1e-36
Lactobacillus crispatus strain RL19	100	4	47770.5	NKLD01000536	NKLD01000536.1	NKLD01000536.1	100	4	6	1482	1398	1482	158	1e-36
Lactobacillus crispatus strain RL19	100	4	47770.5	NKLD01000037	NKLD01000037.1	NKLD01000037.1	100	4	1	12702	12618	12702	158	1e-36
Lactobacillus crispatus strain RL21	100	4	47770.5	NKLB01000308	NKLB01000308.1	NKLB01000308.1	100	4	6	1482	1398	1482	158	1e-36
Lactobacillus crispatus strain RL21	100	4	47770.5	NKLB01000006	NKLB01000006.1	NKLB01000006.1	100	4	3	1	85	2526	158	1e-36
Lactobacillus crispatus strain RL24	100	4	47770.5	NKKZ01000303	NKKZ01000303.1	NKKZ01000303.1	100	4	6	1482	1398	1482	158	1e-36
Lactobacillus crispatus strain RL24	100	4	47770.5	NKKZ01000039	NKKZ01000039.1	NKKZ01000039.1	100	4	1	12702	12618	12702	158	1e-36
Lactobacillus crispatus strain RL26	100	4	47770.5	NKKX01000209	NKKX01000209.1	NKKX01000209.1	100	4	6	1482	1398	1482	158	1e-36
Lactobacillus crispatus strain RL26	100	4	47770.5	NKKX01000178	NKKX01000178.1	NKKX01000178.1	100	4	0	40589	40505	40589	158	1e-36
Lactobacillus crispatus strain RL29	100	4	47770.5	NKKU01000304	NKKU01000304.1	NKKU01000304.1	100	4	1	1	85	11770	158	1e-36
Lactobacillus crispatus strain RL29	100	4	47770.5	NKKU01000302	NKKU01000302.1	NKKU01000302.1	100	4	0	1	85	24975	158	1e-36
Lactobacillus crispatus strain RL16	100	4	47770.6	NKLF01000283	NKLF01000283.1	NKLF01000283.1	100	4	6	1	84	1481	156	5e-36
Lactobacillus crispatus strain RL16	100	4	47770.6	NKLF01000246	NKLF01000246.1	NKLF01000246.1	100	4	1	1	84	11915	156	5e-36
Lactobacillus crispatus strain RL15	100	4	47770.6	NKLG01000308	NKLG01000308.1	NKLG01000308.1	100	4	6	1	84	1480	156	5e-36
Lactobacillus crispatus strain RL26	100	4	47770.5	NKKX01000037	NKKX01000037.1	NKKX01000037.1	100	4	1	12701	12618	12701	156	5e-36
Lactobacillus crispatus strain RL05	100	4	47770.6	NKLP01000296	NKLP01000296.1	NKLP01000296.1	100	4	23	357	276	360	153	6e-35
Lactobacillus crispatus strain RL31	100	4	47770.5	NKKS01000218	NKKS01000218.1	NKKS01000218.1	100	4	5	1	81	1598	151	2e-34
Lactobacillus crispatus strain RL31	100	4	47770.5	NKKS01000006	NKKS01000006.1	NKKS01000006.1	100	4	1	1	81	15562	151	2e-34
Lactobacillus crispatus strain RL32	100	4	47770.5	NKKR01000187	NKKR01000187.1	NKKR01000187.1	100	4	5	1	81	1598	151	2e-34
Lactobacillus crispatus strain RL32	100	4	47770.5	NKKR01000006	NKKR01000006.1	NKKR01000006.1	100	4	1	1	81	15563	151	2e-34
Lactobacillus crispatus strain UMB0040	98	3	47770.2	PKKH01000038	PKKH01000038.1	PKKH01000038.1	98	3	0	65	1	19639	114	3e-23
Lactobacillus crispatus strain UMB0040	100	2	47770.2	PKKH01000094	PKKH01000094.1	PKKH01000094.1	100	2	7	1	45	635	84	2e-14
