# Supplementary material for: Characterization of the first vaginal Lactobacillus crispatus genomes isolated in Brazil
Source: PeerJ. 2021 Mar 10;9:e11079. doi: 10.7717/peerj.11079 (PMC7955673; doi:10.7717/peerj.11079)
Supplement: Supplemental Information 6 [file peerj-09-11079-s006.xlsx]

## Sheet: CRI4 summary
Total: 6 prophage regions have been identified, of which 0 regions are intact, 4 regions are incomplete, and 2 regions are questionable.
Region	Region Length	Completeness	Score	# Total Proteins	Region Position	Most Common Phage	GC %
LcB143_contig_46
1	18.6Kb	questionable	70	14	156-18836 info_outline	PHAGE_Lactob_phiadh_NC_000896(7)	36.61%
LcB143_contig_50
2	52.3Kb	questionable	90	63	72482-124819 info_outline	PHAGE_Lactob_phiadh_NC_000896(21)	35.79%
LcB143_contig_64
3	13.7Kb	incomplete	20	23	6469-20222 info_outline	PHAGE_Lactob_phiadh_NC_000896(3)	33.82%
LcB143_contig_74
4	8.1Kb	incomplete	20	16	5448-13598 info_outline	PHAGE_Lactob_phiAQ113_NC_019782(5)	41.39%
LcB143_contig_75
5	17.9Kb	incomplete	40	23	879-18796 info_outline	PHAGE_Lactob_phiAQ113_NC_019782(8)	41.78%
LcB143_contig_77
6	18.2Kb	incomplete	20	27	6874-25094 info_outline	PHAGE_Lactob_Lj965_NC_005355(6)	38.13%
Intact (score > 90)
Questionable (score 70-90)
Incomplete (score < 70)
Region:	The number assigned to the region.
Region Length:	The length of the sequence of that region (in bp).
Completeness:	A prediction of whether the region contains a intact or incomplete prophage based on the above criteria.
Score:	The score of the region based on the above criteria.
# Total Proteins:	The number of ORFs present in the region.
Region Position:	The start and end positions of the region on the bacterial chromosome.
Most Common Phage:	The phage(s) with the highest number of proteins most similar to those in the region.
GC %:	The percentage of GC nucleotides of the region.
Criteria for scoring prophage regions (as intact, questionable, or incomplete):
Method 1:
1. If the number of certain phage organism in this table is more than or equal to 100% of the total number of CDS of the region, the region is marked with total score 150. If less than 100%, method 2 and 3 will be used.
Method 2:
1. If the number of certain phage organism in this table is more than 50% of the total number of CDS of the region, that phage organism is considered as the major potential phage for that region; the percentage of the total number of that phage organism in this table in the total number of proteins of the region is calculated and then multipled by 100; the percentage of the length of that phage o…
Method 3:
1. If any of the specific phage-related keywords (such as 'capsid', 'head', 'integrase', 'plate', 'tail', 'fiber', 'coat', 'transposase', 'portal', 'terminase', 'protease' or 'lysin') are present, the score will be increased by 10 for each keyword found.
2. If the size of the region is greater than 30 Kb, the score will be increased by 10.
3. If there are at least 40 proteins in the region, the score will be increased by 10.
4. If all of the phage-related proteins and hypothetical proteins constitute more than 70% of the total number of proteins in the region, the score will be increased by 10.
Compared the total score of method 2 with the total score of method 3, the bigger one is chosen as the total score of the region.
If the region's total score is less than 70, it is marked as incomplete; if between 70 to 90, it is marked as questionable; if greater than 90, it is marked as intact.

## Sheet: CRI4 details
Region 1, lcb143_contig_46, total 14 CDS
#	CDS Position	BLAST Hit	E-Value
1	complement(156..1394)	PROPHAGE_Escher_CFT073: transposase; PP_01014; phage(gi26248352)	2.17e-09
2	1747..1842	hypothetical; PP_01015	0.0
3	1857..2642	PHAGE_Lactob_phiadh_NC_000896: hypothetical protein; PP_01016; phage(gi9633041)	4.70e-99
4	2647..3291	PHAGE_Lactob_phiadh_NC_000896: ClpP-like protease; PP_01017; phage(gi9633042)	1.54e-80
5	3310..4668	PHAGE_Lactob_Sha1_NC_019489: HK97 family phage major capsid protein; PP_01018; phage(gi418489806)	9.69e-62
6	4685..5074	PHAGE_Lactob_phiadh_NC_000896: hypothetical protein; PP_01019; phage(gi9633044)	7.47e-22
7	5091..5393	PHAGE_Lactob_phiadh_NC_000896: hypothetical protein; PP_01020; phage(gi9633045)	3.28e-11
8	5419..5784	PHAGE_Strept_DT1_NC_002072: putative tail component protein; PP_01021; phage(gi9632427)	1.00e-21
9	6155..6931	PHAGE_Strept_DT1_NC_002072: major tail protein; PP_01022; phage(gi9632429)	1.39e-20
10	7012..7425	hypothetical; PP_01023	0.0
11	7464..7625	hypothetical; PP_01024	0.0
12	7659..14678	PHAGE_Lactoc_bIL286_NC_002667: tail protein; PP_01025; phage(gi13095795)	1.98e-124
13	14752..15429	PHAGE_Lactob_phiadh_NC_000896: hypothetical protein; PP_01026; phage(gi9633053)	6.07e-14
14	15456..18836	PHAGE_Lactob_phiadh_NC_000896: hypothetical protein; PP_01027; phage(gi9633055)	4.29e-37
Region 2, lcb143_contig_50, total 65 CDS
#	CDS Position	BLAST Hit	E-Value
1	72482..74398	PHAGE_Salmon_BTP1_NC_042346: hypothetical protein; PP_01127; phage(gi100015)	1.24e-28
2	74416..75354	hypothetical; PP_01128	0.0
3	75546..76145	PHAGE_Escher_ECML_117_NC_025441: putative 3-oxoacyl-(acyl-carrier-protein) reductase; PP_01129; phage(gi725950210)	2.23e-08
4	76152..76400	hypothetical; PP_01130	0.0
5	76503..76691	hypothetical; PP_01131	0.0
6	76830..76845	attL	0.0
7	complement(76863..78062)	PHAGE_Lactob_Lj928_NC_005354: putative integrase; PP_01132; phage(gi41179288)	9.16e-175
8	complement(78192..78737)	hypothetical; PP_01133	0.0
9	complement(78997..79404)	PHAGE_Staphy_PVL_NC_002321: hypothetical protein; PP_01134; phage(gi9635201)	2.63e-23
10	complement(79407..79811)	PHAGE_Lactob_Lj965_NC_005355: putative repressor; PP_01135; phage(gi41179223)	2.83e-25
11	complement(79814..80158)	PHAGE_Lactoc_PLgT_1_NC_031016: aerobic ribonucleotide reductase B subunit; PP_01136; phage(gi100063)	6.64e-16
12	80422..80733	hypothetical; PP_01137	0.0
13	80957..81148	PHAGE_Lactob_phiadh_NC_000896: hypothetical protein; PP_01138; phage(gi9633012)	6.30e-18
14	81164..81913	PHAGE_Staphy_13_NC_004617: anti-repressor; PP_01139; phage(gi29028674)	5.26e-77
15	81916..82134	PHAGE_Lactob_Lj965_NC_005355: hypothetical protein; PP_01140; phage(gi41179256)	3.52e-23
16	82295..82411	hypothetical; PP_01141	0.0
17	82435..82761	hypothetical; PP_01142	0.0
18	82796..83029	hypothetical; PP_01143	0.0
19	83270..83845	PHAGE_Lactob_A2_NC_004112: putative endodeoxyribonuclease; PP_01144; phage(gi22296579)	1.79e-41
20	83862..84545	PHAGE_Strept_O1205_NC_004303: hypothetical protein; PP_01145; phage(gi23455857)	1.73e-80
21	84578..84826	hypothetical; PP_01146	0.0
22	84827..86176	PHAGE_Lactob_phiadh_NC_000896: putative DEAH-family helicase; PP_01147; phage(gi9633020)	2.92e-160
23	86341..86892	PHAGE_Lactob_phiadh_NC_000896: hypothetical protein; PP_01148; phage(gi9633021)	1.14e-34
24	86904..89234	PHAGE_Lactob_phiadh_NC_000896: putative DNA-polymerase or DNA-primase; PP_01149; phage(gi9633023)	0.0
25	89481..89675	hypothetical; PP_01150	0.0
26	89706..90038	hypothetical; PP_01151	0.0
27	90179..90478	hypothetical; PP_01152	0.0
28	90492..90707	PHAGE_Lister_P35_NC_009814: gp47; PP_01153; phage(gi157325412)	3.33e-05
29	90806..91036	hypothetical; PP_01154	0.0
30	91234..91476	hypothetical; PP_01155	0.0
31	91557..91760	PHAGE_Lactob_phiAQ113_NC_019782: hypothetical protein; PP_01156; phage(gi446730280)	1.09e-16
32	91814..91900	hypothetical; PP_01157	0.0
33	91964..92350	PHAGE_Lactob_LfeSau_NC_029068: DNA nuclease; PP_01158; phage(gi985757765)	1.12e-48
34	92365..92484	hypothetical; PP_01159	0.0
35	92531..92995	PHAGE_Lactob_phiadh_NC_000896: hypothetical protein; PP_01160; phage(gi9633037)	5.30e-26
36	93268..93858	PHAGE_Lactob_phiadh_NC_000896: hypothetical protein; PP_01161; phage(gi9633038)	3.46e-62
37	94017..94469	PHAGE_Lactob_phiadh_NC_000896: hypothetical protein; PP_01162; phage(gi9633039)	3.52e-74
38	94726..96624	PHAGE_Lactob_phiadh_NC_000896: hypothetical protein; PP_01163; phage(gi9633040)	0.0
39	96674..96808	hypothetical; PP_01164	0.0
40	96811..97995	PHAGE_Lactob_phiadh_NC_000896: hypothetical protein; PP_01165; phage(gi9633041)	9.46e-168
41	98030..98665	PHAGE_Lactob_phiadh_NC_000896: ClpP-like protease; PP_01166; phage(gi9633042)	1.40e-87
42	98680..99990	PHAGE_Lactob_Sha1_NC_019489: HK97 family phage major capsid protein; PP_01167; phage(gi418489806)	1.51e-68
43	100008..100370	PHAGE_Lactob_phiadh_NC_000896: hypothetical protein; PP_01168; phage(gi9633044)	4.31e-24
44	100517..100603	hypothetical; PP_01169	0.0
45	100679..101119	PHAGE_Lactob_phiadh_NC_000896: hypothetical protein; PP_01170; phage(gi9633046)	1.88e-34
46	101146..101505	PHAGE_Lactob_Lv_1_NC_011801: head-tail joining protein; PP_01171; phage(gi219563204)	1.71e-10
47	101571..102191	PHAGE_Lactob_phiadh_NC_000896: major tail protein; PP_01172; phage(gi9633048)	1.15e-30
48	102291..102635	hypothetical; PP_01173	0.0
49	102667..102849	PHAGE_Lactob_phiadh_NC_000896: hypothetical protein; PP_01174; phage(gi9633050)	2.49e-05
50	102853..109230	PHAGE_Lactob_phiAT3_NC_005893: putative minor tail protein; PP_01175; phage(gi48697271)	5.86e-83
51	109277..109993	PHAGE_Lactob_phiadh_NC_000896: hypothetical protein; PP_01176; phage(gi9633053)	2.02e-22
52	110050..113307	PHAGE_Lactob_phiadh_NC_000896: hypothetical protein; PP_01177; phage(gi9633055)	9.79e-35
53	113310..113495	hypothetical; PP_01178	0.0
54	113509..115110	PHAGE_Lactob_phiadh_NC_000896: hypothetical protein; PP_01179; phage(gi9633056)	3.77e-20
55	115124..115597	hypothetical; PP_01180	0.0
56	115742..116173	hypothetical; PP_01181	0.0
57	116404..116856	PHAGE_Lactob_phiadh_NC_000896: hypothetical protein; PP_01182; phage(gi9633057)	6.45e-07
58	116977..117393	PHAGE_Lactob_phiadh_NC_000896: hypothetical protein; PP_01183; phage(gi9633059)	1.71e-05
59	117646..118104	PHAGE_Lactob_phiJB_NC_022775: holin protein; PP_01184; phage(gi571797853)	2.54e-14
60	118145..118990	PHAGE_Lactob_LL_H_NC_009554: muramidase; PP_01185; phage(gi148750862)	3.18e-106
61	119444..119644	PHAGE_Lactob_phiadh_NC_000896: hypothetical protein; PP_01186; phage(gi9633063)	5.94e-24
62	119657..119672	attR	0.0
63	119760..121316	hypothetical; PP_01187	0.0
64	complement(121378..121596)	hypothetical; PP_01188	0.0
65	121712..124819	PHAGE_Strept_Lannister_NC_028827: DNA polymerase III subunit alpha; PP_01189; phage(gi971747049)	4.58e-151
Region 3, lcb143_contig_64, total 25 CDS
#	CDS Position	BLAST Hit	E-Value
1	complement(6469..7215)	PHAGE_Staphy_phiJB_NC_028669: antirepressor; PP_01424; phage(gi966198851)	3.39e-86
2	complement(7225..7386)	hypothetical; PP_01425	0.0
3	complement(7430..7618)	hypothetical; PP_01426	0.0
4	complement(7662..7862)	hypothetical; PP_01427	0.0
5	complement(7939..8193)	hypothetical; PP_01428	0.0
6	complement(8604..8864)	PHAGE_Staphy_B236_NC_028915: hypothetical protein; PP_01429; phage(gi971755317)	8.66e-14
7	8606..8619	attL	0.0
8	complement(8879..9205)	hypothetical; PP_01430	0.0
9	9288..9488	hypothetical; PP_01431	0.0
10	complement(9489..10346)	PHAGE_Lactob_Lv_1_NC_011801: DnaA; PP_01432; phage(gi219563230)	2.37e-17
11	complement(10413..10541)	hypothetical; PP_01433	0.0
12	complement(10553..10669)	hypothetical; PP_01434	0.0
13	complement(10673..10924)	PHAGE_Lactob_phiadh_NC_000896: hypothetical protein; PP_01435; phage(gi9633013)	7.74e-08
14	complement(11086..11160)	hypothetical; PP_01436	0.0
15	11172..11678	PHAGE_Lactob_phiadh_NC_000896: hypothetical protein; PP_01437; phage(gi9633011)	4.29e-21
16	complement(11777..11893)	hypothetical; PP_01438	0.0
17	complement(11984..12133)	hypothetical; PP_01439	0.0
18	12157..12327	hypothetical; PP_01440	0.0
19	complement(12497..12721)	PHAGE_Lactob_Lv_1_NC_011801: Cro-like repressor; PP_01441; phage(gi219563223)	7.42e-07
20	12854..13480	PHAGE_Lactob_Lv_1_NC_011801: Ci-like repressor; PP_01442; phage(gi219563222)	3.60e-52
21	complement(13842..14057)	hypothetical; PP_01443	0.0
22	14129..14818	hypothetical; PP_01444	0.0
23	14991..15995	PHAGE_Entero_vB_IME197_NC_028671: abortive infection bacteriophage resistance protein; PP_01445; phage(gi966199036)	1.27e-25
24	16203..17426	PHAGE_Lactob_Lj771_NC_010179: integrase XerC-like protein; PP_01446; phage(gi163932153)	2.38e-102
25	20222..20235	attR	0.0
Region 4, lcb143_contig_74, total 16 CDS
#	CDS Position	BLAST Hit	E-Value
1	complement(5448..5630)	PHAGE_Clostr_phiMMP01_NC_028883: hypothetical protein; PP_01738; phage(gi971820038)	2.21e-05
2	complement(5657..5752)	hypothetical; PP_01739	0.0
3	complement(5806..5964)	hypothetical; PP_01740	0.0
4	complement(6261..6428)	hypothetical; PP_01741	0.0
5	complement(6522..7643)	PHAGE_Lactob_phiAQ113_NC_019782: endolysin; PP_01742; phage(gi446730260)	0.0
6	complement(7730..7996)	PHAGE_Lactob_Lv_1_NC_011801: hypothetical protein; PP_01743; phage(gi219563214)	1.63e-09
7	complement(8125..8328)	PHAGE_Lactob_phiAQ113_NC_019782: hypothetical protein; PP_01744; phage(gi446730258)	2.11e-15
8	complement(8342..8563)	PHAGE_Lactob_phiAQ113_NC_019782: hypothetical protein; PP_01745; phage(gi446730257)	2.90e-07
9	complement(8574..8921)	PHAGE_Lactob_Lv_1_NC_011801: holin; PP_01746; phage(gi219563212)	2.39e-11
10	complement(8932..9114)	hypothetical; PP_01747	0.0
11	complement(9133..9696)	PHAGE_Lactob_phiAQ113_NC_019782: phage related protein; PP_01748; phage(gi446730255)	5.86e-22
12	complement(9780..10202)	hypothetical; PP_01749	0.0
13	complement(10263..10463)	hypothetical; PP_01750	0.0
14	complement(10595..11014)	hypothetical; PP_01751	0.0
15	complement(11067..11423)	hypothetical; PP_01752	0.0
16	complement(11454..13598)	PHAGE_Lactob_phiAQ113_NC_019782: hypothetical protein; PP_01753; phage(gi446730253)	8.92e-46
Region 5, lcb143_contig_75, total 23 CDS
#	CDS Position	BLAST Hit	E-Value
1	complement(879..1235)	PHAGE_Lactob_Lj771_NC_010179: MazF-like protein; PP_01757; phage(gi163932202)	5.79e-28
2	complement(1269..1541)	PHAGE_Lactob_Lj771_NC_010179: Maz-like protein; PP_01758; phage(gi163932201)	1.43e-18
3	complement(1788..2960)	PHAGE_Lactob_phiAQ113_NC_019782: endolysin; PP_01759; phage(gi446730260)	0.0
4	complement(2981..3337)	PHAGE_Lactob_phiAQ113_NC_019782: hypothetical protein; PP_01760; phage(gi446730259)	3.12e-13
5	complement(3379..3597)	PHAGE_Lactob_phiAQ113_NC_019782: hypothetical protein; PP_01761; phage(gi446730258)	3.98e-13
6	complement(3620..3829)	PHAGE_Lactob_phiAQ113_NC_019782: hypothetical protein; PP_01762; phage(gi446730257)	8.57e-33
7	complement(3847..4170)	hypothetical; PP_01763	0.0
8	complement(4211..4390)	PHAGE_Lactob_phiAQ113_NC_019782: hypothetical protein; PP_01764; phage(gi446730256)	5.28e-15
9	complement(4393..4989)	PHAGE_Lactob_phiAQ113_NC_019782: phage related protein; PP_01765; phage(gi446730255)	6.58e-27
10	complement(5084..5455)	PHAGE_Lactob_phiAQ113_NC_019782: hypothetical protein; PP_01766; phage(gi446730254)	1.31e-18
11	complement(5461..5802)	hypothetical; PP_01767	0.0
12	complement(5811..6197)	hypothetical; PP_01768	0.0
13	complement(6267..6614)	hypothetical; PP_01769	0.0
14	complement(6637..8811)	PHAGE_Lactob_phiAQ113_NC_019782: hypothetical protein; PP_01770; phage(gi446730253)	6.13e-46
15	complement(8828..9916)	hypothetical; PP_01771	0.0
16	complement(9945..10709)	PHAGE_Deep_s_D6E_NC_019544: hypothetical protein; PP_01772; phage(gi423262344)	4.85e-07
17	complement(10780..11811)	PHAGE_Lactob_LBR48_NC_027990: putative baseplate protein; PP_01773; phage(gi937456778)	8.46e-56
18	complement(11958..12302)	PHAGE_Lactob_LBR48_NC_027990: putative baseplate assembly protein; PP_01774; phage(gi937456777)	4.28e-08
19	complement(12313..12786)	hypothetical; PP_01775	0.0
20	complement(12799..13902)	PHAGE_Lister_B054_NC_009813: gp21; PP_01776; phage(gi157325305)	4.79e-21
21	complement(13926..14336)	PHAGE_Lactob_LBR48_NC_027990: hypothetical protein; PP_01777; phage(gi937456774)	2.32e-14
22	complement(14349..15308)	PHAGE_Lactob_LBR48_NC_027990: putative muramidase; PP_01778; phage(gi937456773)	1.08e-11
23	complement(15320..18796)	PHAGE_Lactob_Ldl1_NC_026609: tape measure protein; PP_01779; phage(gi764162084)	1.55e-50
Region 6, lcb143_contig_77, total 29 CDS
#	CDS Position	BLAST Hit	E-Value
1	6874..6885	attL	0.0
2	complement(12813..13337)	PHAGE_Lactob_phiJB_NC_022775: hypothetical protein; PP_01812; phage(gi571797876)	2.31e-23
3	complement(13420..13701)	hypothetical; PP_01813	0.0
4	complement(13727..14080)	PHAGE_Lactob_LfeSau_NC_029068: DNA nuclease; PP_01814; phage(gi985757765)	1.04e-43
5	complement(14097..14513)	hypothetical; PP_01815	0.0
6	complement(14654..14848)	hypothetical; PP_01816	0.0
7	complement(14851..15279)	hypothetical; PP_01817	0.0
8	complement(15294..15551)	hypothetical; PP_01818	0.0
9	complement(15658..15882)	hypothetical; PP_01819	0.0
10	complement(15918..16652)	PHAGE_Staphy_Ipla5_NC_018281: DNA replication protein; PP_01820; phage(gi399528938)	3.82e-40
11	complement(16654..17439)	PHAGE_Lactob_Lj965_NC_005355: putative replication protein; PP_01821; phage(gi41179231)	1.02e-72
12	complement(17442..18320)	PHAGE_Lactob_Lj965_NC_005355: hypothetical protein; PP_01822; phage(gi41179230)	1.47e-32
13	complement(18323..18688)	hypothetical; PP_01823	0.0
14	complement(18758..18925)	hypothetical; PP_01824	0.0
15	complement(18942..19187)	hypothetical; PP_01825	0.0
16	complement(19192..19491)	PHAGE_Lactob_Lj965_NC_005355: hypothetical protein; PP_01826; phage(gi41179256)	5.25e-06
17	19581..19997	hypothetical; PP_01827	0.0
18	complement(20132..20299)	hypothetical; PP_01828	0.0
19	complement(20300..20509)	PHAGE_Lactob_phiadh_NC_000896: hypothetical protein; PP_01829; phage(gi9633013)	5.62e-07
20	complement(20547..20696)	hypothetical; PP_01830	0.0
21	complement(20711..20929)	PHAGE_Lactob_phiadh_NC_000896: hypothetical protein; PP_01831; phage(gi9633008)	9.52e-09
22	complement(20942..21685)	PHAGE_Lactob_Lj965_NC_005355: putative antirepressor; PP_01832; phage(gi41179226)	1.75e-123
23	complement(21720..21929)	PHAGE_Lactob_Lj771_NC_010179: hypothetical protein; PP_01833; phage(gi163932157)	1.34e-16
24	22100..22447	PHAGE_Lactob_LF1_NC_019486: xre family toxin-antitoxin system; PP_01834; phage(gi418489419)	9.10e-25
25	22457..22855	PHAGE_Lactob_phiadh_NC_000896: hypothetical protein; PP_01835; phage(gi9633004)	4.45e-26
26	22905..23513	PHAGE_Lactob_Lj965_NC_005355: putative superinfection immunity protein; PP_01836; phage(gi41179219)	1.06e-38
27	23527..23859	hypothetical; PP_01837	0.0
28	23701..23712	attR	0.0
29	23946..25094	PHAGE_Lactob_Lj965_NC_005355: putative integrase; PP_01838; phage(gi41179218)	3.24e-72

## Sheet: CR8 summary
Total: 5 prophage regions have been identified, of which 0 regions are intact, 5 regions are incomplete, and 0 regions are questionable.
Region	Region Length	Completeness	Score	# Total Proteins	Region Position	Most Common Phage	GC %
LcB144_contig_44
1	36.8Kb	incomplete	60	48	25639-62533 info_outline	PHAGE_Lister_B054_NC_009813(15)	42.07%
2	18.9Kb	incomplete	50	28	59690-78671 info_outline	PHAGE_Lactob_Lj965_NC_005355(3)	38.10%
LcB144_contig_47
3	18Kb	incomplete	60	15	140207-158294 info_outline	PHAGE_Clostr_c_st_NC_007581(2)	34.91%
4	24.7Kb	incomplete	30	18	176519-201258 info_outline	PHAGE_Lactob_jlb1_NC_024206(5)	34.00%
LcB144_contig_63
5	5.8Kb	incomplete	30	6	62332-68214 info_outline	PHAGE_Burkho_ST79_NC_021343(2)	37.99%
Intact (score > 90)
Questionable (score 70-90)
Incomplete (score < 70)
Region:	The number assigned to the region.
Region Length:	The length of the sequence of that region (in bp).
Completeness:	A prediction of whether the region contains a intact or incomplete prophage based on the above criteria.
Score:	The score of the region based on the above criteria.
# Total Proteins:	The number of ORFs present in the region.
Region Position:	The start and end positions of the region on the bacterial chromosome.
Most Common Phage:	The phage(s) with the highest number of proteins most similar to those in the region.
GC %:	The percentage of GC nucleotides of the region.
Criteria for scoring prophage regions (as intact, questionable, or incomplete):
Method 1:
1. If the number of certain phage organism in this table is more than or equal to 100% of the total number of CDS of the region, the region is marked with total score 150. If less than 100%, method 2 and 3 will be used.
Method 2:
1. If the number of certain phage organism in this table is more than 50% of the total number of CDS of the region, that phage organism is considered as the major potential phage for that region; the percentage of the total number of that phage organism in this table in the total number of proteins of the region is calculated and then multipled by 100; the percentage of the length of that phage o…
Method 3:
1. If any of the specific phage-related keywords (such as 'capsid', 'head', 'integrase', 'plate', 'tail', 'fiber', 'coat', 'transposase', 'portal', 'terminase', 'protease' or 'lysin') are present, the score will be increased by 10 for each keyword found.
2. If the size of the region is greater than 30 Kb, the score will be increased by 10.
3. If there are at least 40 proteins in the region, the score will be increased by 10.
4. If all of the phage-related proteins and hypothetical proteins constitute more than 70% of the total number of proteins in the region, the score will be increased by 10.
Compared the total score of method 2 with the total score of method 3, the bigger one is chosen as the total score of the region.
If the region's total score is less than 70, it is marked as incomplete; if between 70 to 90, it is marked as questionable; if greater than 90, it is marked as intact.

## Sheet: CRI8 details
Region 1, lcb144_contig_44, total 52 CDS
#	CDS Position	BLAST Hit	E-Value
1	complement(25639..27912)	PHAGE_Bacill_0305phi8_36_NC_009760: RecJ; PP_01498; phage(gi156564062)	5.80e-83
2	complement(28036..28722)	hypothetical; PP_01499	0.0
3	complement(29198..29554)	PHAGE_Lactob_Lj771_NC_010179: MazF-like protein; PP_01500; phage(gi163932202)	5.79e-28
4	complement(29588..29860)	PHAGE_Lactob_Lj771_NC_010179: Maz-like protein; PP_01501; phage(gi163932201)	1.43e-18
5	complement(30068..31189)	PHAGE_Lactob_phiAQ113_NC_019782: endolysin; PP_01502; phage(gi446730260)	0.0
6	complement(31288..31653)	PHAGE_Lactob_phiAQ113_NC_019782: hypothetical protein; PP_01503; phage(gi446730259)	1.42e-16
7	complement(31686..31880)	PHAGE_Lactob_phiAQ113_NC_019782: hypothetical protein; PP_01504; phage(gi446730258)	1.39e-14
8	complement(31900..32121)	PHAGE_Lactob_phiAQ113_NC_019782: hypothetical protein; PP_01505; phage(gi446730257)	6.59e-06
9	complement(32132..32479)	PHAGE_Lactob_Lv_1_NC_011801: holin; PP_01506; phage(gi219563212)	3.67e-11
10	complement(32490..32672)	PHAGE_Lactob_phiAQ113_NC_019782: hypothetical protein; PP_01507; phage(gi446730256)	6.03e-05
11	complement(32691..33338)	PHAGE_Lactob_phiAQ113_NC_019782: phage related protein; PP_01508; phage(gi446730255)	2.25e-40
12	complement(33426..33728)	PHAGE_Lactob_phiAQ113_NC_019782: hypothetical protein; PP_01509; phage(gi446730254)	8.06e-14
13	complement(33797..34189)	hypothetical; PP_01510	0.0
14	complement(34208..35878)	PHAGE_Lactob_phiadh_NC_000896: hypothetical protein; PP_01511; phage(gi9633056)	2.61e-20
15	complement(35894..36388)	hypothetical; PP_01512	0.0
16	complement(36633..37754)	PHAGE_Lister_B054_NC_009813: gp24; PP_01513; phage(gi157325308)	2.54e-69
17	complement(37804..38055)	PHAGE_Lactob_LBR48_NC_027990: putative baseplate assembly protein; PP_01514; phage(gi937456777)	3.65e-05
18	complement(38183..38662)	hypothetical; PP_01515	0.0
19	complement(38676..39575)	PHAGE_Lister_B054_NC_009813: gp21; PP_01516; phage(gi157325305)	1.68e-15
20	complement(39740..40150)	PHAGE_Lister_B054_NC_009813: gp20; PP_01517; phage(gi157325304)	6.42e-12
21	complement(40162..41196)	PHAGE_Lister_B054_NC_009813: gp19; PP_01518; phage(gi157325303)	1.06e-12
22	complement(41214..46820)	PHAGE_Lactoc_bIL286_NC_002667: tail protein; PP_01519; phage(gi13095795)	7.66e-85
23	complement(46889..47038)	hypothetical; PP_01520	0.0
24	complement(47091..47537)	hypothetical; PP_01521	0.0
25	complement(47558..47989)	PHAGE_Lister_B054_NC_009813: gp15; PP_01522; phage(gi157325299)	1.92e-16
26	complement(48004..49137)	PHAGE_Lister_B054_NC_009813: gp14; PP_01523; phage(gi157325298)	1.02e-64
27	complement(49197..49736)	PHAGE_Lactob_LBR48_NC_027990: hypothetical protein; PP_01524; phage(gi937456761)	4.97e-10
28	complement(49750..50124)	PHAGE_Lister_B054_NC_009813: gp12; PP_01525; phage(gi157325296)	1.04e-05
29	complement(50148..50741)	PHAGE_Lister_B054_NC_009813: gp11; PP_01526; phage(gi157325295)	5.50e-24
30	complement(50795..51196)	PHAGE_Lister_B054_NC_009813: gp10; PP_01527; phage(gi157325294)	5.76e-05
31	complement(51211..52059)	PHAGE_Lister_B054_NC_009813: gp8; PP_01528; phage(gi157325292)	3.75e-25
32	complement(52146..52739)	PHAGE_Lister_B054_NC_009813: gp7; PP_01529; phage(gi157325291)	3.96e-17
33	complement(52752..53876)	PHAGE_Lister_B054_NC_009813: gp6; PP_01530; phage(gi157325290)	4.30e-69
34	complement(53878..54375)	hypothetical; PP_01531	0.0
35	complement(54425..55165)	PHAGE_Lister_B054_NC_009813: gp4; PP_01532; phage(gi157325288)	2.22e-20
36	complement(55215..56624)	PHAGE_Lister_B054_NC_009813: gp3; PP_01533; phage(gi157325287)	3.13e-49
37	complement(56634..57974)	PHAGE_Lister_B054_NC_009813: TerL; PP_01534; phage(gi157325286)	1.97e-138
38	complement(58078..58635)	PHAGE_Brocho_NF5_NC_015252: gp1; PP_01535; phage(gi327197585)	1.17e-31
39	58721..58900	hypothetical; PP_01536	0.0
40	58950..59342	PHAGE_Paenib_Harrison_NC_028746: antitoxin HicB; PP_01537; phage(gi971482390)	7.46e-15
41	complement(59719..59820)	hypothetical; PP_01538	0.0
42	complement(59826..60020)	hypothetical; PP_01539	0.0
43	complement(60062..60247)	hypothetical; PP_01540	0.0
44	complement(60248..60703)	hypothetical; PP_01541	0.0
45	complement(60773..60855)	tRNA	0.0
46	complement(60860..60933)	tRNA	0.0
47	complement(60960..61094)	hypothetical; PP_01542	0.0
48	complement(61048..61109)	tRNA	0.0
49	61120..61452	hypothetical; PP_01543	0.0
50	complement(61241..61313)	tRNA	0.0
51	complement(61634..62158)	PHAGE_Lactob_phiJB_NC_022775: hypothetical protein; PP_01544; phage(gi571797876)	5.88e-23
52	complement(62177..62533)	PHAGE_Lactob_jlb1_NC_024206: putative holliday junction resolvase; PP_01545; phage(gi971848906)	3.60e-28
Region 2, lcb144_contig_44, total 32 CDS
#	CDS Position	BLAST Hit	E-Value
1	59690..59701	attL	0.0
2	complement(64524..65318)	PHAGE_Lactob_phiAQ113_NC_019782: DNA replication protein; PP_01552; phage(gi446730275)	3.98e-59
3	complement(65333..66139)	PHAGE_Lactob_jlb1_NC_024206: putative replication protein; PP_01553; phage(gi971848899)	1.98e-43
4	complement(66142..66891)	PHAGE_Lactob_jlb1_NC_024206: hypothetical protein; PP_01554; phage(gi971848898)	1.04e-53
5	complement(66911..67168)	hypothetical; PP_01555	0.0
6	complement(67178..67369)	hypothetical; PP_01556	0.0
7	complement(67375..67455)	hypothetical; PP_01557	0.0
8	complement(67505..67681)	hypothetical; PP_01558	0.0
9	complement(67689..67904)	PHAGE_Brevib_Jimmer2_NC_041976: hypothetical protein; PP_01559; phage(gi100057)	6.05e-09
10	complement(67910..68158)	hypothetical; PP_01560	0.0
11	complement(68198..68425)	hypothetical; PP_01561	0.0
12	complement(68437..68733)	hypothetical; PP_01562	0.0
13	complement(68845..68979)	hypothetical; PP_01563	0.0
14	complement(68993..69130)	hypothetical; PP_01564	0.0
15	complement(69143..69886)	PHAGE_Lactob_Lj965_NC_005355: putative antirepressor; PP_01565; phage(gi41179226)	8.69e-109
16	69942..70184	PHAGE_Lactob_phiadh_NC_000896: hypothetical protein; PP_01566; phage(gi9633010)	5.05e-26
17	complement(70365..70538)	hypothetical; PP_01567	0.0
18	complement(70539..70757)	hypothetical; PP_01568	0.0
19	71010..71351	PHAGE_Lactob_phiadh_NC_000896: Rad protein; PP_01569; phage(gi9633005)	1.79e-09
20	71360..71797	PHAGE_Lactob_Lj965_NC_005355: putative repressor; PP_01570; phage(gi41179223)	2.39e-23
21	71814..72134	hypothetical; PP_01571	0.0
22	72173..72439	hypothetical; PP_01572	0.0
23	72485..73198	PHAGE_Clostr_c_st_NC_007581: putative IS transposase (OrfA); PP_01573; phage(gi80159862)	1.04e-74	New Insertion Sequence
24	73257..74414	PHAGE_Lactob_Lb338_1_NC_012530: transposase; PP_01574; phage(gi226377790)	2.77e-71	New Insertion Sequence
25	74420..74557	hypothetical; PP_01575	0.0
26	74617..74629	attL	0.0
27	complement(74656..74769)	hypothetical; PP_01576	0.0
28	74861..75190	hypothetical; PP_01577	0.0
29	complement(75259..75597)	PHAGE_Lactob_Lj928_NC_005354: putative major head protein; PP_01578; phage(gi41179318)	2.64e-27
30	75919..76596	PHAGE_Lactob_Lj965_NC_005355: putative integrase; PP_01579; phage(gi41179218)	2.97e-31
31	78534..78546	attR	0.0
32	78671..78682	attR	0.0
Region 3, lcb144_contig_47, total 17 CDS
#	CDS Position	BLAST Hit	E-Value
1	140207..140218	attL	0.0
2	complement(145304..147487)	PHAGE_Lactoc_WRP3_NC_027341: ribonucleotide diphosphate reductase subunit aplpha; PP_01816; phage(gi849250940)	0.0
3	complement(147871..148899)	PHAGE_Mycoba_Bongo_NC_041970: baseplate wedge subunit; PP_01817; phage(gi100108)	1.29e-120
4	149117..149287	hypothetical; PP_01818	0.0
5	complement(149514..149639)	hypothetical; PP_01819	0.0
6	149940..150008	hypothetical; PP_01820	0.0
7	complement(150191..150796)	PHAGE_Ralsto_RSM3_NC_011399: hypothetical protein; PP_01821; phage(gi209901327)	1.13e-30
8	complement(151274..151693)	PROPHAGE_Strept_2603V/R: IS1381 transposase protein A; PP_01822; phage(gi22537126)	5.81e-56
9	complement(151735..152235)	PROPHAGE_Staphy_N315: transposase; PP_01823; phage(gi15927655)	6.22e-12
10	complement(152524..152739)	hypothetical; PP_01824	0.0
11	complement(152746..153531)	PHAGE_Entero_EF62phi_NC_017732: chromosome partitioning ATPase; PP_01825; phage(gi384519759)	1.48e-37
12	154110..155222	PHAGE_Strept_9872_NC_031094: hypothetical protein; PP_01826; phage(gi100030)	9.31e-19
13	155394..155570	hypothetical; PP_01827	0.0
14	155621..156337	hypothetical; PP_01828	0.0
15	156099..156110	attR	0.0
16	156365..157078	PHAGE_Clostr_c_st_NC_007581: putative IS transposase (OrfA); PP_01829; phage(gi80159862)	1.04e-74	New Insertion Sequence
17	157137..158294	PHAGE_Lactob_Lb338_1_NC_012530: transposase; PP_01830; phage(gi226377790)	2.77e-71	New Insertion Sequence
Region 4, lcb144_contig_47, total 20 CDS
#	CDS Position	BLAST Hit	E-Value
1	176519..176530	attL	0.0
2	complement(190758..192785)	PHAGE_Acinet_Bphi_B1251_NC_019541: putative restriction-modification protein; PP_01866; phage(gi423261981)	3.53e-11
3	complement(192996..193265)	PHAGE_Bacill_Shbh1_NC_030925: baseplate hub assembly protein; PP_01867; phage(gi100106)	2.91e-05
4	complement(193268..193630)	hypothetical; PP_01868	0.0
5	complement(193733..194344)	hypothetical; PP_01869	0.0
6	complement(194361..194747)	hypothetical; PP_01870	0.0
7	complement(194750..194950)	hypothetical; PP_01871	0.0
8	complement(194970..195287)	hypothetical; PP_01872	0.0
9	195374..196003	PHAGE_Staphy_CNPH82_NC_008722: putative cI-like repressor; PP_01873; phage(gi119953713)	3.31e-09
10	complement(196012..196386)	hypothetical; PP_01874	0.0
11	complement(196460..196804)	PHAGE_Lactob_jlb1_NC_024206: hypothetical protein; PP_01875; phage(gi971848894)	9.96e-29
12	complement(196807..197517)	PHAGE_Burkho_Bcep22_NC_005262: putative DNA replication protein; PP_01876; phage(gi38640333)	6.61e-22
13	197719..197787	hypothetical; PP_01877	0.0
14	197789..197956	PHAGE_Clostr_phiMMP03_NC_028959: hypothetical protein; PP_01878; phage(gi971820263)	6.75e-18
15	complement(198080..198811)	PHAGE_Lactob_jlb1_NC_024206: putative replication protein; PP_01879; phage(gi971848899)	1.05e-20
16	complement(198869..199075)	PHAGE_Lactob_jlb1_NC_024206: putative CI-like repressor; PP_01880; phage(gi971848893)	7.84e-13
17	199231..199578	PHAGE_Lactob_jlb1_NC_024206: putative XRE family transcriptional regulator; PP_01881; phage(gi971848892)	1.83e-20
18	199594..199998	PHAGE_Lactob_phiadh_NC_000896: hypothetical protein; PP_01882; phage(gi9633004)	1.37e-24
19	199846..199857	attR	0.0
20	200140..201258	PHAGE_Lactob_jlb1_NC_024206: putative integrase; PP_01883; phage(gi971848889)	4.41e-68
Region 5, lcb144_contig_63, total 6 CDS
#	CDS Position	BLAST Hit	E-Value
1	complement(62332..62652)	PHAGE_Burkho_ST79_NC_021343: HicB protein; PP_02531; phage(gi509141623)	1.36e-23
2	complement(62660..62935)	PHAGE_Burkho_ST79_NC_021343: HicA protein; PP_02532; phage(gi509141624)	5.06e-05
3	62960..64186	PROPHAGE_Escher_CFT073: transposase; PP_02533; phage(gi26246249)	6.92e-58
4	complement(64433..65731)	PHAGE_Gordon_Ghobes_NC_031028: DNA polymerase; PP_02534; phage(gi100036)	5.91e-20
5	complement(65735..67024)	PHAGE_Mycoba_Sebata_NC_041993: hinge connector of long tail fiber proximal connector; PP_02535; phage(gi100264)	7.13e-23
6	67180..68214	PHAGE_Staphy_42E_NC_007052: ORF012; PP_02536; phage(gi66395520)	6.83e-173

## Sheet: CR10 summary
Total: 6 prophage regions have been identified, of which 0 regions are intact, 5 regions are incomplete, and 1 regions are questionable.
Region	Region Length	Completeness	Score	# Total Proteins	Region Position	Most Common Phage	GC %
LcB146_contig_31
1	52.2Kb	questionable	80	64	104944-157197 info_outline	PHAGE_Lactob_phiadh_NC_000896(22)	35.77%
LcB146_contig_36
2	16.3Kb	incomplete	50	21	22607-38976 info_outline	PHAGE_Lactob_phiadh_NC_000896(3)	36.71%
LcB146_contig_42
3	31.2Kb	incomplete	50	41	230-31511 info_outline	PHAGE_Lactob_LBR48_NC_027990(14)	42.74%
LcB146_contig_43
4	13.1Kb	incomplete	10	25	199-13379 info_outline	PHAGE_Lister_B054_NC_009813(4)	39.47%
LcB146_contig_44
5	19.5Kb	incomplete	50	29	1668-21170 info_outline	PHAGE_Lactob_Lj965_NC_005355(3)	37.94%
LcB146_contig_52
6	18.9Kb	incomplete	50	19	1260-20214 info_outline	PHAGE_Lactob_LBR48_NC_027990(11)	41.69%
Intact (score > 90)
Questionable (score 70-90)
Incomplete (score < 70)
Region:	The number assigned to the region.
Region Length:	The length of the sequence of that region (in bp).
Completeness:	A prediction of whether the region contains a intact or incomplete prophage based on the above criteria.
Score:	The score of the region based on the above criteria.
# Total Proteins:	The number of ORFs present in the region.
Region Position:	The start and end positions of the region on the bacterial chromosome.
Most Common Phage:	The phage(s) with the highest number of proteins most similar to those in the region.
GC %:	The percentage of GC nucleotides of the region.
Criteria for scoring prophage regions (as intact, questionable, or incomplete):
Method 1:
1. If the number of certain phage organism in this table is more than or equal to 100% of the total number of CDS of the region, the region is marked with total score 150. If less than 100%, method 2 and 3 will be used.
Method 2:
1. If the number of certain phage organism in this table is more than 50% of the total number of CDS of the region, that phage organism is considered as the major potential phage for that region; the percentage of the total number of that phage organism in this table in the total number of proteins of the region is calculated and then multipled by 100; the percentage of the length of that phage o…
Method 3:
1. If any of the specific phage-related keywords (such as 'capsid', 'head', 'integrase', 'plate', 'tail', 'fiber', 'coat', 'transposase', 'portal', 'terminase', 'protease' or 'lysin') are present, the score will be increased by 10 for each keyword found.
2. If the size of the region is greater than 30 Kb, the score will be increased by 10.
3. If there are at least 40 proteins in the region, the score will be increased by 10.
4. If all of the phage-related proteins and hypothetical proteins constitute more than 70% of the total number of proteins in the region, the score will be increased by 10.
Compared the total score of method 2 with the total score of method 3, the bigger one is chosen as the total score of the region.
If the region's total score is less than 70, it is marked as incomplete; if between 70 to 90, it is marked as questionable; if greater than 90, it is marked as intact.

## Sheet: CRI10 details
Region 1, lcb146_contig_31, total 67 CDS
#	CDS Position	BLAST Hit	E-Value
1	104944..106908	PHAGE_Plankt_PaV_LD_NC_016564: protein kinase; PP_01024; phage(gi371496162)	8.75e-17
2	106909..107799	hypothetical; PP_01025	0.0
3	107812..108462	hypothetical; PP_01026	0.0
4	108477..109136	hypothetical; PP_01027	0.0
5	109176..109256	hypothetical; PP_01028	0.0
6	109272..109481	hypothetical; PP_01029	0.0
7	109596..109640	attL	0.0
8	complement(109698..110864)	PHAGE_Lactob_LF1_NC_019486: phage integrase; PP_01030; phage(gi418489411)	9.45e-91
9	complement(111021..111554)	hypothetical; PP_01031	0.0
10	complement(111603..112406)	PHAGE_Strept_SpSL1_NC_027396: hypothetical protein; PP_01032; phage(gi849256064)	4.56e-20
11	complement(112408..112776)	PHAGE_Strept_SpSL1_NC_027396: CI repressor; PP_01033; phage(gi849256065)	2.93e-10
12	complement(112778..112954)	hypothetical; PP_01034	0.0
13	113010..113222	PHAGE_Lactoc_bIL312_NC_002671: repressor; PP_01035; phage(gi13095896)	8.66e-11
14	113225..113965	PHAGE_Lactob_Sha1_NC_019489: phage-related antirepressor; PP_01036; phage(gi418489833)	2.53e-66
15	113974..114279	PHAGE_Lactob_LL_H_NC_009554: hypothetical protein; PP_01037; phage(gi148750868)	1.07e-13
16	114523..114855	hypothetical; PP_01038	0.0
17	114890..115123	PHAGE_Lactob_phiadh_NC_000896: hypothetical protein; PP_01039; phage(gi9633017)	3.37e-05
18	115364..116086	PHAGE_Lactob_phiadh_NC_000896: NTP-binding motif protein; PP_01040; phage(gi9633018)	8.24e-123
19	116131..116367	hypothetical; PP_01041	0.0
20	116368..117711	PHAGE_Lactob_phiadh_NC_000896: putative DEAH-family helicase; PP_01042; phage(gi9633020)	8.14e-161
21	117714..118283	PHAGE_Lactob_phiadh_NC_000896: hypothetical protein; PP_01043; phage(gi9633021)	8.70e-29
22	118296..120617	PHAGE_Lactob_phiadh_NC_000896: putative DNA-polymerase or DNA-primase; PP_01044; phage(gi9633023)	0.0
23	121065..121331	hypothetical; PP_01045	0.0
24	121471..121647	hypothetical; PP_01046	0.0
25	121697..121927	hypothetical; PP_01047	0.0
26	121941..122156	PHAGE_Lister_P35_NC_009814: gp47; PP_01048; phage(gi157325412)	6.51e-05
27	122159..122377	hypothetical; PP_01049	0.0
28	122550..122777	hypothetical; PP_01050	0.0
29	122940..123176	hypothetical; PP_01051	0.0
30	123257..123460	PHAGE_Lactob_phiAQ113_NC_019782: hypothetical protein; PP_01052; phage(gi446730280)	2.53e-19
31	123679..124056	PHAGE_Lactob_LfeSau_NC_029068: DNA nuclease; PP_01053; phage(gi985757765)	5.20e-48
32	124070..124192	hypothetical; PP_01054	0.0
33	124194..124730	PHAGE_Lactob_JCL1032_NC_019456: hypothetical protein; PP_01055; phage(gi418489169)	1.67e-08
34	124786..125265	PHAGE_Lactob_phiadh_NC_000896: hypothetical protein; PP_01056; phage(gi9633037)	1.15e-20
35	complement(125390..125539)	hypothetical; PP_01057	0.0
36	125515..125586	tRNA	0.0
37	125612..126154	PHAGE_Lactob_phiadh_NC_000896: hypothetical protein; PP_01058; phage(gi9633038)	7.25e-63
38	126316..126768	PHAGE_Lactob_phiadh_NC_000896: hypothetical protein; PP_01059; phage(gi9633039)	6.33e-72
39	126839..127048	PHAGE_Lactob_LBR48_NC_027990: putative toxin component; PP_01060; phage(gi937456740)	1.10e-12
40	127077..127469	PHAGE_Paenib_Shelly_NC_041909: endonuclease II; PP_01061; phage(gi100065)	2.85e-14
41	127514..129448	PHAGE_Lactob_phiadh_NC_000896: hypothetical protein; PP_01062; phage(gi9633040)	0.0
42	129635..130819	PHAGE_Lactob_phiadh_NC_000896: hypothetical protein; PP_01063; phage(gi9633041)	3.42e-167
43	130854..131483	PHAGE_Lactob_phiadh_NC_000896: ClpP-like protease; PP_01064; phage(gi9633042)	5.12e-88
44	131498..132790	PHAGE_Lactoc_bIL286_NC_002667: capsid protein; PP_01065; phage(gi13095788)	7.37e-68
45	132811..133173	PHAGE_Lactob_phiadh_NC_000896: hypothetical protein; PP_01066; phage(gi9633044)	3.38e-23
46	133479..133919	PHAGE_Lactob_phiadh_NC_000896: hypothetical protein; PP_01067; phage(gi9633046)	2.38e-35
47	133973..134305	PHAGE_Lactob_Lv_1_NC_011801: head-tail joining protein; PP_01068; phage(gi219563204)	1.19e-08
48	134371..135000	PHAGE_Lactob_phiadh_NC_000896: major tail protein; PP_01069; phage(gi9633048)	1.28e-31
49	135106..135450	hypothetical; PP_01070	0.0
50	135482..135664	PHAGE_Lactob_phiadh_NC_000896: hypothetical protein; PP_01071; phage(gi9633050)	3.92e-05
51	135669..142118	PHAGE_Lactob_phiadh_NC_000896: hypothetical protein; PP_01072; phage(gi9633051)	4.40e-75
52	142165..142881	PHAGE_Lactob_phiadh_NC_000896: hypothetical protein; PP_01073; phage(gi9633053)	6.67e-22
53	142938..146207	PHAGE_Lactob_phiadh_NC_000896: hypothetical protein; PP_01074; phage(gi9633055)	1.56e-36
54	146210..146395	hypothetical; PP_01075	0.0
55	146409..148010	PHAGE_Lactob_phiadh_NC_000896: hypothetical protein; PP_01076; phage(gi9633056)	3.19e-19
56	148024..148497	hypothetical; PP_01077	0.0
57	148613..149227	PHAGE_Lactob_Lj965_NC_005355: hypothetical protein; PP_01078; phage(gi41179262)	2.69e-06
58	149326..149784	PHAGE_Lactob_phiadh_NC_000896: hypothetical protein; PP_01079; phage(gi9633057)	1.32e-07
59	149905..150321	PHAGE_Lactob_phiadh_NC_000896: hypothetical protein; PP_01080; phage(gi9633059)	1.71e-06
60	150554..150988	PHAGE_Lactob_phiJB_NC_022775: holin protein; PP_01081; phage(gi571797853)	1.47e-20
61	150999..151865	PHAGE_Lactob_LL_H_NC_009554: muramidase; PP_01082; phage(gi148750862)	2.42e-106
62	152261..152557	PHAGE_Lactob_Lj965_NC_005355: hypothetical protein; PP_01083; phage(gi41179255)	3.11e-08
63	152758..152802	attR	0.0
64	complement(152760..152945)	hypothetical; PP_01084	0.0
65	153113..153475	hypothetical; PP_01085	0.0
66	153497..155158	hypothetical; PP_01086	0.0
67	155161..157197	PHAGE_Strept_858_NC_010353: orf37; PP_01087; phage(gi168229310)	1.92e-06
Region 2, lcb146_contig_36, total 23 CDS
#	CDS Position	BLAST Hit	E-Value
1	22607..22618	attL	0.0
2	26178..26990	PHAGE_Mycoba_Butters_NC_021061: integrase; PP_01275; phage(gi479336499)	3.61e-18
3	26999..27523	PROPHAGE_Escher_Sakai: ATP-dependent protease peptidase subunit; PP_01276; phage(gi15834113)	7.20e-49
4	27535..28932	PROPHAGE_Escher_Sakai: ATP-dependent protease ATP-binding subunit HslU; PP_01277; phage(gi15834112)	2.87e-140
5	29092..29988	hypothetical; PP_01278	0.0
6	30006..30827	hypothetical; PP_01279	0.0
7	30918..30929	attR	0.0
8	complement(31034..32191)	PHAGE_Lactob_Lj928_NC_005354: putative integrase; PP_01280; phage(gi41179288)	1.11e-81
9	complement(32271..32951)	hypothetical; PP_01281	0.0
10	complement(32954..33370)	PHAGE_Lactob_phiadh_NC_000896: hypothetical protein; PP_01282; phage(gi9633004)	1.02e-32
11	complement(33372..33707)	PHAGE_Lactob_Lj771_NC_010179: cl repressor; PP_01283; phage(gi163932156)	2.48e-24
12	33893..34141	PHAGE_Lactob_Lj771_NC_010179: hypothetical protein; PP_01284; phage(gi163932157)	4.15e-23
13	34144..34437	hypothetical; PP_01285	0.0
14	34438..34752	hypothetical; PP_01286	0.0
15	34812..34994	hypothetical; PP_01287	0.0
16	35003..35212	PHAGE_Brevib_Abouo_NC_029029: transcriptional regulator; PP_01288; phage(gi971767216)	9.41e-09
17	35225..35515	hypothetical; PP_01289	0.0
18	35523..35702	hypothetical; PP_01290	0.0
19	35761..36138	hypothetical; PP_01291	0.0
20	36221..37006	PHAGE_Lactob_Lj928_NC_005354: putative replication protein; PP_01292; phage(gi41179303)	2.50e-29
21	37171..37980	PHAGE_Lactob_Lj928_NC_005354: hypothetical protein; PP_01293; phage(gi41179304)	1.49e-36
22	37982..38698	PHAGE_Burkho_Bcep22_NC_005262: putative DNA replication protein; PP_01294; phage(gi38640333)	2.20e-23
23	38749..38976	PHAGE_Lactob_phiAQ113_NC_019782: putative transcriptional regulator; PP_01295; phage(gi446730276)	6.28e-15
Region 3, lcb146_contig_42, total 41 CDS
#	CDS Position	BLAST Hit	E-Value
1	complement(230..1351)	PHAGE_Lactob_phiAQ113_NC_019782: endolysin; PP_01541; phage(gi446730260)	0.0
2	complement(1450..1815)	PHAGE_Lactob_phiAQ113_NC_019782: hypothetical protein; PP_01542; phage(gi446730259)	1.42e-16
3	complement(1848..2042)	PHAGE_Lactob_phiAQ113_NC_019782: hypothetical protein; PP_01543; phage(gi446730258)	1.82e-15
4	complement(2062..2283)	PHAGE_Lactob_phiAQ113_NC_019782: hypothetical protein; PP_01544; phage(gi446730257)	6.59e-06
5	complement(2294..2641)	PHAGE_Lactob_Lv_1_NC_011801: holin; PP_01545; phage(gi219563212)	3.67e-11
6	complement(2652..2834)	PHAGE_Lactob_phiAQ113_NC_019782: hypothetical protein; PP_01546; phage(gi446730256)	6.03e-05
7	complement(2853..3479)	PHAGE_Lactob_phiAQ113_NC_019782: phage related protein; PP_01547; phage(gi446730255)	2.61e-40
8	complement(3568..3795)	hypothetical; PP_01548	0.0
9	complement(4047..4325)	hypothetical; PP_01549	0.0
10	complement(4334..4699)	hypothetical; PP_01550	0.0
11	complement(4700..5044)	hypothetical; PP_01551	0.0
12	complement(5114..5506)	hypothetical; PP_01552	0.0
13	complement(5512..7215)	PHAGE_Lactob_KC5a_NC_007924: hypothetical protein; PP_01553; phage(gi90592630)	6.92e-05
14	complement(7231..7725)	hypothetical; PP_01554	0.0
15	complement(7970..9067)	PHAGE_Lister_B054_NC_009813: gp24; PP_01555; phage(gi157325308)	2.07e-69
16	complement(9141..9392)	hypothetical; PP_01556	0.0
17	complement(9520..9999)	hypothetical; PP_01557	0.0
18	complement(10013..10912)	PHAGE_Lister_B054_NC_009813: gp21; PP_01558; phage(gi157325305)	2.20e-16
19	complement(11077..11487)	PHAGE_Lister_B054_NC_009813: gp20; PP_01559; phage(gi157325304)	6.42e-12
20	complement(11499..12533)	PHAGE_Lister_B054_NC_009813: gp19; PP_01560; phage(gi157325303)	1.04e-12
21	complement(12551..18214)	PHAGE_Lactoc_bIL286_NC_002667: tail protein; PP_01561; phage(gi13095795)	1.47e-79
22	complement(18284..18433)	hypothetical; PP_01562	0.0
23	complement(18486..18932)	hypothetical; PP_01563	0.0
24	complement(18953..19384)	PHAGE_Lister_B054_NC_009813: gp15; PP_01564; phage(gi157325299)	1.92e-16
25	complement(19399..20532)	PHAGE_Lister_B054_NC_009813: gp14; PP_01565; phage(gi157325298)	5.11e-66
26	complement(20592..21131)	PHAGE_Lactob_LBR48_NC_027990: hypothetical protein; PP_01566; phage(gi937456761)	2.88e-09
27	complement(21145..21519)	PHAGE_Lister_B054_NC_009813: gp12; PP_01567; phage(gi157325296)	3.01e-06
28	complement(21543..22136)	PHAGE_Lister_B054_NC_009813: gp11; PP_01568; phage(gi157325295)	2.42e-24
29	complement(22190..22591)	hypothetical; PP_01569	0.0
30	complement(22606..23454)	PHAGE_Lister_B054_NC_009813: gp8; PP_01570; phage(gi157325292)	1.05e-26
31	complement(23541..24146)	PHAGE_Lister_B054_NC_009813: gp7; PP_01571; phage(gi157325291)	5.77e-17
32	complement(24159..25283)	PHAGE_Lister_B054_NC_009813: gp6; PP_01572; phage(gi157325290)	6.60e-68
33	complement(25285..25644)	hypothetical; PP_01573	0.0
34	complement(25723..26418)	PHAGE_Lactob_Lc_Nu_NC_007501: putative HNH endonuclease; PP_01574; phage(gi78000020)	8.25e-36
35	26440..26580	hypothetical; PP_01575	0.0
36	complement(26596..27294)	PHAGE_Lister_B054_NC_009813: gp4; PP_01576; phage(gi157325288)	3.22e-18
37	complement(27380..28789)	PHAGE_Lister_B054_NC_009813: gp3; PP_01577; phage(gi157325287)	8.83e-49
38	complement(28804..30150)	PHAGE_Lister_B054_NC_009813: TerL; PP_01578; phage(gi157325286)	2.65e-141
39	complement(30248..30805)	PHAGE_Brocho_NF5_NC_015252: gp1; PP_01579; phage(gi327197585)	5.48e-31
40	30891..31070	hypothetical; PP_01580	0.0
41	31119..31511	PHAGE_Paenib_Harrison_NC_028746: antitoxin HicB; PP_01581; phage(gi971482390)	7.46e-15
Region 4, lcb146_contig_43, total 26 CDS
#	CDS Position	BLAST Hit	E-Value
1	complement(199..1953)	PHAGE_Lister_B054_NC_009813: gp7; PP_01595; phage(gi157325291)	1.08e-13
2	complement(1959..2345)	hypothetical; PP_01596	0.0
3	complement(2351..3106)	PHAGE_Lister_B054_NC_009813: gp4; PP_01597; phage(gi157325288)	4.97e-29
4	complement(3132..4553)	PHAGE_Lister_B054_NC_009813: gp3; PP_01598; phage(gi157325287)	2.00e-52
5	complement(4569..5939)	PHAGE_Lister_B054_NC_009813: TerL; PP_01599; phage(gi157325286)	9.51e-122
6	complement(6013..6510)	hypothetical; PP_01600	0.0
7	complement(6580..6879)	hypothetical; PP_01601	0.0
8	complement(6892..7056)	PHAGE_Lactob_Lj771_NC_010179: hypothetical protein; PP_01602; phage(gi163932179)	2.39e-12
9	complement(7082..7255)	PHAGE_Lactob_jlb1_NC_024206: putative ParB protein; PP_01603; phage(gi971848911)	1.83e-28
10	complement(7259..7462)	hypothetical; PP_01604	0.0
11	complement(7475..7792)	hypothetical; PP_01605	0.0
12	complement(7975..8205)	hypothetical; PP_01606	0.0
13	8259..8378	hypothetical; PP_01607	0.0
14	complement(8616..8686)	tRNA	0.0
15	complement(8948..9442)	PHAGE_Lactob_phiJB_NC_022775: hypothetical protein; PP_01608; phage(gi571797876)	4.48e-13
16	complement(9448..9642)	PHAGE_Strept_SpSL1_NC_027396: Cro repressor; PP_01609; phage(gi849256086)	9.41e-08
17	complement(9650..9916)	hypothetical; PP_01610	0.0
18	complement(9928..10074)	hypothetical; PP_01611	0.0
19	complement(10077..10457)	PHAGE_Lactob_LfeSau_NC_029068: DNA nuclease; PP_01612; phage(gi985757765)	1.46e-30
20	complement(10460..10615)	hypothetical; PP_01613	0.0
21	complement(10630..11319)	PHAGE_Entero_phiFL2A_NC_013643: anti-repressor protein; PP_01614; phage(gi281416498)	4.29e-37
22	complement(11330..11557)	hypothetical; PP_01615	0.0
23	complement(11586..12023)	hypothetical; PP_01616	0.0
24	complement(12035..12244)	hypothetical; PP_01617	0.0
25	complement(12270..12734)	hypothetical; PP_01618	0.0
26	complement(12843..13379)	PHAGE_Lactob_phig1e_NC_004305: putative methyltransferase; PP_01619; phage(gi23455790)	2.44e-51
Region 5, lcb146_contig_44, total 33 CDS
#	CDS Position	BLAST Hit	E-Value
1	complement(1668..2462)	PHAGE_Lactob_phiAQ113_NC_019782: DNA replication protein; PP_01632; phage(gi446730275)	4.24e-58
2	complement(2477..3283)	PHAGE_Lactob_jlb1_NC_024206: putative replication protein; PP_01633; phage(gi971848899)	5.91e-43
3	complement(3286..4035)	PHAGE_Lactob_jlb1_NC_024206: hypothetical protein; PP_01634; phage(gi971848898)	1.04e-53
4	complement(4049..4306)	hypothetical; PP_01635	0.0
5	complement(4316..4405)	hypothetical; PP_01636	0.0
6	complement(4437..4508)	hypothetical; PP_01637	0.0
7	4550..4563	attL	0.0
8	complement(4635..4820)	hypothetical; PP_01638	0.0
9	complement(4828..5043)	PHAGE_Brevib_Jimmer2_NC_041976: hypothetical protein; PP_01639; phage(gi100057)	6.05e-09
10	complement(5049..5234)	hypothetical; PP_01640	0.0
11	complement(5290..5565)	hypothetical; PP_01641	0.0
12	complement(5577..5873)	hypothetical; PP_01642	0.0
13	complement(5985..6119)	hypothetical; PP_01643	0.0
14	complement(6133..6270)	hypothetical; PP_01644	0.0
15	complement(6283..7026)	PHAGE_Lactob_Lj965_NC_005355: putative antirepressor; PP_01645; phage(gi41179226)	8.69e-109
16	7082..7324	PHAGE_Lactob_phiadh_NC_000896: hypothetical protein; PP_01646; phage(gi9633010)	5.05e-26
17	complement(7505..7678)	hypothetical; PP_01647	0.0
18	complement(7679..7897)	hypothetical; PP_01648	0.0
19	8150..8491	PHAGE_Lactob_phiadh_NC_000896: Rad protein; PP_01649; phage(gi9633005)	1.07e-09
20	8500..8937	PHAGE_Lactob_Lj965_NC_005355: putative repressor; PP_01650; phage(gi41179223)	2.39e-23
21	8954..9274	hypothetical; PP_01651	0.0
22	9313..9579	hypothetical; PP_01652	0.0
23	9625..10338	PHAGE_Clostr_c_st_NC_007581: putative IS transposase (OrfA); PP_01653; phage(gi80159862)	1.04e-74
24	10397..11554	PHAGE_Lactob_Lb338_1_NC_012530: transposase; PP_01654; phage(gi226377790)	2.77e-71
25	11560..11697	hypothetical; PP_01655	0.0
26	11757..11769	attL	0.0
27	complement(11796..11909)	hypothetical; PP_01656	0.0
28	11984..12307	hypothetical; PP_01657	0.0
29	complement(12376..12714)	PHAGE_Lactob_Lj928_NC_005354: putative major head protein; PP_01658; phage(gi41179318)	2.64e-27
30	12942..13031	hypothetical; PP_01659	0.0
31	13036..14235	PHAGE_Lactob_Lj965_NC_005355: putative integrase; PP_01660; phage(gi41179218)	1.62e-73
32	16191..16203	attR	0.0
33	21170..21183	attR	0.0
Region 6, lcb146_contig_52, total 19 CDS
#	CDS Position	BLAST Hit	E-Value
1	complement(1260..3434)	PHAGE_Lactob_Lv_1_NC_011801: minor capsid protein; PP_01953; phage(gi219563210)	1.62e-11
2	complement(3451..4539)	hypothetical; PP_01954	0.0
3	complement(4568..5335)	PHAGE_Deep_s_D6E_NC_019544: hypothetical protein; PP_01955; phage(gi423262344)	4.67e-07
4	complement(5406..6518)	PHAGE_Lactob_LBR48_NC_027990: putative baseplate protein; PP_01956; phage(gi937456778)	2.13e-56
5	complement(6577..6927)	PHAGE_Lactob_LBR48_NC_027990: putative baseplate assembly protein; PP_01957; phage(gi937456777)	4.48e-08
6	complement(6938..7411)	hypothetical; PP_01958	0.0
7	complement(7424..8527)	PHAGE_Lactob_LBR48_NC_027990: hypothetical protein; PP_01959; phage(gi937456775)	2.54e-09
8	complement(8538..8960)	PHAGE_Lactob_LBR48_NC_027990: hypothetical protein; PP_01960; phage(gi937456774)	1.66e-14
9	complement(8973..9941)	PHAGE_Lactob_LBR48_NC_027990: putative muramidase; PP_01961; phage(gi937456773)	8.55e-12
10	complement(9944..15160)	PHAGE_Lactob_LBR48_NC_027990: hypothetical protein; PP_01962; phage(gi937456771)	9.25e-46
11	complement(15230..15376)	hypothetical; PP_01963	0.0
12	complement(15444..15812)	PHAGE_Lactob_LBR48_NC_027990: hypothetical protein; PP_01964; phage(gi937456764)	6.03e-07
13	complement(15869..16300)	PHAGE_Lactob_LBR48_NC_027990: hypothetical protein; PP_01965; phage(gi937456763)	7.85e-12
14	complement(16319..17449)	PHAGE_Lactob_LBR48_NC_027990: putative structure protein; PP_01966; phage(gi937456762)	2.16e-25
15	complement(17488..17931)	hypothetical; PP_01967	0.0
16	complement(17963..18418)	hypothetical; PP_01968	0.0
17	complement(18436..18807)	PHAGE_Lactob_LBR48_NC_027990: putative morphogenesis protein; PP_01969; phage(gi937456759)	2.39e-19
18	complement(19032..19421)	hypothetical; PP_01970	0.0
19	complement(19423..20214)	PHAGE_Lactob_LBR48_NC_027990: putative capsid protein; PP_01971; phage(gi937456756)	8.38e-08

## Sheet: CR17 summary
Total: 5 prophage regions have been identified, of which 0 regions are intact, 4 regions are incomplete, and 1 regions are questionable.
Region	Region Length	Completeness	Score	# Total Proteins	Region Position	Most Common Phage	GC %
LcB151_contig_22
1	24.7Kb	incomplete	60	14	19291-44034 info_outline	PHAGE_Clostr_c_st_NC_007581(2)	35.20%
LcB151_contig_47
2	47.8Kb	questionable	80	60	50917-98732 info_outline	PHAGE_Lactob_phiadh_NC_000896(22)	35.52%
LcB151_contig_57
3	35.7Kb	incomplete	50	46	828-36567 info_outline	PHAGE_Lactob_LBR48_NC_027990(14)	41.92%
LcB151_contig_58
4	12.6Kb	incomplete	30	26	1008-13691 info_outline	PHAGE_Lactob_Lj965_NC_005355(3)	37.61%
LcB151_contig_78
5	5.8Kb	incomplete	30	6	23977-29859 info_outline	PHAGE_Burkho_ST79_NC_021343(2)	38.09%
Intact (score > 90)
Questionable (score 70-90)
Incomplete (score < 70)
Region:	The number assigned to the region.
Region Length:	The length of the sequence of that region (in bp).
Completeness:	A prediction of whether the region contains a intact or incomplete prophage based on the above criteria.
Score:	The score of the region based on the above criteria.
# Total Proteins:	The number of ORFs present in the region.
Region Position:	The start and end positions of the region on the bacterial chromosome.
Most Common Phage:	The phage(s) with the highest number of proteins most similar to those in the region.
GC %:	The percentage of GC nucleotides of the region.
Criteria for scoring prophage regions (as intact, questionable, or incomplete):
Method 1:
1. If the number of certain phage organism in this table is more than or equal to 100% of the total number of CDS of the region, the region is marked with total score 150. If less than 100%, method 2 and 3 will be used.
Method 2:
1. If the number of certain phage organism in this table is more than 50% of the total number of CDS of the region, that phage organism is considered as the major potential phage for that region; the percentage of the total number of that phage organism in this table in the total number of proteins of the region is calculated and then multipled by 100; the percentage of the length of that phage o…
Method 3:
1. If any of the specific phage-related keywords (such as 'capsid', 'head', 'integrase', 'plate', 'tail', 'fiber', 'coat', 'transposase', 'portal', 'terminase', 'protease' or 'lysin') are present, the score will be increased by 10 for each keyword found.
2. If the size of the region is greater than 30 Kb, the score will be increased by 10.
3. If there are at least 40 proteins in the region, the score will be increased by 10.
4. If all of the phage-related proteins and hypothetical proteins constitute more than 70% of the total number of proteins in the region, the score will be increased by 10.
Compared the total score of method 2 with the total score of method 3, the bigger one is chosen as the total score of the region.
If the region's total score is less than 70, it is marked as incomplete; if between 70 to 90, it is marked as questionable; if greater than 90, it is marked as intact.

## Sheet: CRI17 details
Region 1, lcb151_contig_22, total 16 CDS
#	CDS Position	BLAST Hit	E-Value
1	19291..19302	attL	0.0
2	complement(29642..30799)	PHAGE_Lactob_Lb338_1_NC_012530: transposase; PP_00661; phage(gi226377790)	2.77e-71	New insertion sequence
3	complement(30858..31571)	PHAGE_Clostr_c_st_NC_007581: putative IS transposase (OrfA); PP_00662; phage(gi80159862)	1.04e-74	New insertion sequence
4	complement(31599..32315)	hypothetical; PP_00663	0.0
5	complement(32366..32542)	hypothetical; PP_00664	0.0
6	complement(32714..33826)	PHAGE_Strept_9872_NC_031094: hypothetical protein; PP_00665; phage(gi100030)	9.31e-19
7	34405..35190	PHAGE_Entero_EF62phi_NC_017732: chromosome partitioning ATPase; PP_00666; phage(gi384519759)	1.48e-37
8	35197..35412	hypothetical; PP_00667	0.0
9	35701..36201	PROPHAGE_Staphy_N315: transposase; PP_00668; phage(gi15927655)	6.22e-12
10	36243..36662	PROPHAGE_Strept_2603V/R: IS1381 transposase protein A; PP_00669; phage(gi22537126)	5.81e-56
11	37140..37745	PHAGE_Ralsto_RSM3_NC_011399: hypothetical protein; PP_00670; phage(gi209901327)	1.13e-30
12	38294..38422	hypothetical; PP_00671	0.0
13	complement(38649..38819)	hypothetical; PP_00672	0.0
14	39037..40065	PHAGE_Mycoba_Bongo_NC_041970: baseplate wedge subunit; PP_00673; phage(gi100108)	1.29e-120
15	40464..42632	PHAGE_Lactoc_WRP3_NC_027341: ribonucleotide diphosphate reductase subunit aplpha; PP_00674; phage(gi849250940)	0.0
16	44034..44045	attR	0.0
Region 2, lcb151_contig_47, total 63 CDS
#	CDS Position	BLAST Hit	E-Value
1	50917..52881	PHAGE_Plankt_PaV_LD_NC_016564: protein kinase; PP_01100; phage(gi371496162)	8.75e-17
2	52882..53772	hypothetical; PP_01101	0.0
3	53785..54435	hypothetical; PP_01102	0.0
4	54450..55109	hypothetical; PP_01103	0.0
5	55149..55229	hypothetical; PP_01104	0.0
6	55245..55454	hypothetical; PP_01105	0.0
7	55569..55613	attL	0.0
8	complement(55671..56837)	PHAGE_Lactob_LF1_NC_019486: phage integrase; PP_01106; phage(gi418489411)	9.45e-91
9	complement(56994..57527)	hypothetical; PP_01107	0.0
10	complement(57576..58379)	PHAGE_Strept_SpSL1_NC_027396: hypothetical protein; PP_01108; phage(gi849256064)	4.56e-20
11	complement(58381..58749)	PHAGE_Strept_SpSL1_NC_027396: CI repressor; PP_01109; phage(gi849256065)	2.93e-10
12	complement(58751..58927)	hypothetical; PP_01110	0.0
13	58983..59195	PHAGE_Lactoc_bIL312_NC_002671: repressor; PP_01111; phage(gi13095896)	8.66e-11
14	59198..59938	PHAGE_Lactob_Sha1_NC_019489: phage-related antirepressor; PP_01112; phage(gi418489833)	2.53e-66
15	59947..60252	PHAGE_Lactob_LL_H_NC_009554: hypothetical protein; PP_01113; phage(gi148750868)	1.07e-13
16	60496..60828	hypothetical; PP_01114	0.0
17	60863..61096	PHAGE_Lactob_phiadh_NC_000896: hypothetical protein; PP_01115; phage(gi9633017)	3.37e-05
18	61337..62059	PHAGE_Lactob_phiadh_NC_000896: NTP-binding motif protein; PP_01116; phage(gi9633018)	8.24e-123
19	62104..62340	hypothetical; PP_01117	0.0
20	62341..63684	PHAGE_Lactob_phiadh_NC_000896: putative DEAH-family helicase; PP_01118; phage(gi9633020)	8.14e-161
21	63687..64256	PHAGE_Lactob_phiadh_NC_000896: hypothetical protein; PP_01119; phage(gi9633021)	8.70e-29
22	64269..66590	PHAGE_Lactob_phiadh_NC_000896: putative DNA-polymerase or DNA-primase; PP_01120; phage(gi9633023)	0.0
23	67038..67304	hypothetical; PP_01121	0.0
24	67444..67620	hypothetical; PP_01122	0.0
25	67670..67900	hypothetical; PP_01123	0.0
26	67914..68129	PHAGE_Lister_P35_NC_009814: gp47; PP_01124; phage(gi157325412)	6.51e-05
27	68132..68350	hypothetical; PP_01125	0.0
28	68523..68750	hypothetical; PP_01126	0.0
29	68913..69149	hypothetical; PP_01127	0.0
30	69230..69433	PHAGE_Lactob_phiAQ113_NC_019782: hypothetical protein; PP_01128; phage(gi446730280)	2.53e-19
31	69652..70029	PHAGE_Lactob_LfeSau_NC_029068: DNA nuclease; PP_01129; phage(gi985757765)	5.20e-48
32	70043..70165	hypothetical; PP_01130	0.0
33	70167..70703	PHAGE_Lactob_JCL1032_NC_019456: hypothetical protein; PP_01131; phage(gi418489169)	1.67e-08
34	70759..71238	PHAGE_Lactob_phiadh_NC_000896: hypothetical protein; PP_01132; phage(gi9633037)	1.15e-20
35	complement(71363..71512)	hypothetical; PP_01133	0.0
36	71488..71559	tRNA	0.0
37	71585..72127	PHAGE_Lactob_phiadh_NC_000896: hypothetical protein; PP_01134; phage(gi9633038)	7.25e-63
38	72289..72741	PHAGE_Lactob_phiadh_NC_000896: hypothetical protein; PP_01135; phage(gi9633039)	6.33e-72
39	72812..73021	PHAGE_Lactob_LBR48_NC_027990: putative toxin component; PP_01136; phage(gi937456740)	1.10e-12
40	73050..73442	PHAGE_Paenib_Shelly_NC_041909: endonuclease II; PP_01137; phage(gi100065)	2.85e-14
41	73488..75422	PHAGE_Lactob_phiadh_NC_000896: hypothetical protein; PP_01138; phage(gi9633040)	0.0
42	75609..76793	PHAGE_Lactob_phiadh_NC_000896: hypothetical protein; PP_01139; phage(gi9633041)	3.42e-167
43	76828..77457	PHAGE_Lactob_phiadh_NC_000896: ClpP-like protease; PP_01140; phage(gi9633042)	5.12e-88
44	77472..78764	PHAGE_Lactoc_bIL286_NC_002667: capsid protein; PP_01141; phage(gi13095788)	7.37e-68
45	78785..79147	PHAGE_Lactob_phiadh_NC_000896: hypothetical protein; PP_01142; phage(gi9633044)	3.38e-23
46	79453..79893	PHAGE_Lactob_phiadh_NC_000896: hypothetical protein; PP_01143; phage(gi9633046)	2.38e-35
47	79947..80279	PHAGE_Lactob_Lv_1_NC_011801: head-tail joining protein; PP_01144; phage(gi219563204)	1.19e-08
48	80345..80974	PHAGE_Lactob_phiadh_NC_000896: major tail protein; PP_01145; phage(gi9633048)	9.17e-32
49	81080..81424	hypothetical; PP_01146	0.0
50	81456..81638	PHAGE_Lactob_phiadh_NC_000896: hypothetical protein; PP_01147; phage(gi9633050)	3.92e-05
51	81643..88092	PHAGE_Lactob_phiadh_NC_000896: hypothetical protein; PP_01148; phage(gi9633051)	4.40e-75
52	88139..88855	PHAGE_Lactob_phiadh_NC_000896: hypothetical protein; PP_01149; phage(gi9633053)	6.67e-22
53	88912..92181	PHAGE_Lactob_phiadh_NC_000896: hypothetical protein; PP_01150; phage(gi9633055)	1.56e-36
54	92184..92369	hypothetical; PP_01151	0.0
55	92383..93984	PHAGE_Lactob_phiadh_NC_000896: hypothetical protein; PP_01152; phage(gi9633056)	3.19e-19
56	93998..94471	hypothetical; PP_01153	0.0
57	94587..95201	PHAGE_Lactob_Lj965_NC_005355: hypothetical protein; PP_01154; phage(gi41179262)	2.69e-06
58	95300..95758	PHAGE_Lactob_phiadh_NC_000896: hypothetical protein; PP_01155; phage(gi9633057)	1.32e-07
59	95879..96295	PHAGE_Lactob_phiadh_NC_000896: hypothetical protein; PP_01156; phage(gi9633059)	1.71e-06
60	96528..96962	PHAGE_Lactob_phiJB_NC_022775: holin protein; PP_01157; phage(gi571797853)	1.47e-20
61	96973..97839	PHAGE_Lactob_LL_H_NC_009554: muramidase; PP_01158; phage(gi148750862)	2.42e-106
62	98235..98531	PHAGE_Lactob_Lj965_NC_005355: hypothetical protein; PP_01159; phage(gi41179255)	3.11e-08
63	98732..98776	attR	0.0
Region 3, lcb151_contig_57, total 46 CDS
#	CDS Position	BLAST Hit	E-Value
1	complement(828..3101)	PHAGE_Bacill_0305phi8_36_NC_009760: RecJ; PP_01595; phage(gi156564062)	5.80e-83
2	complement(3225..3944)	hypothetical; PP_01596	0.0
3	complement(4000..4113)	hypothetical; PP_01597	0.0
4	complement(4377..4733)	PHAGE_Lactob_Lj771_NC_010179: MazF-like protein; PP_01598; phage(gi163932202)	5.79e-28
5	complement(4767..5039)	PHAGE_Lactob_Lj771_NC_010179: Maz-like protein; PP_01599; phage(gi163932201)	1.43e-18
6	complement(5286..6407)	PHAGE_Lactob_phiAQ113_NC_019782: endolysin; PP_01600; phage(gi446730260)	0.0
7	complement(6506..6871)	PHAGE_Lactob_phiAQ113_NC_019782: hypothetical protein; PP_01601; phage(gi446730259)	1.42e-16
8	complement(6904..7095)	PHAGE_Lactob_phiAQ113_NC_019782: hypothetical protein; PP_01602; phage(gi446730258)	8.88e-15
9	complement(7118..7339)	PHAGE_Lactob_phiAQ113_NC_019782: hypothetical protein; PP_01603; phage(gi446730257)	6.59e-06
10	complement(7350..7697)	PHAGE_Lactob_Lv_1_NC_011801: holin; PP_01604; phage(gi219563212)	3.67e-11
11	complement(7708..7890)	PHAGE_Lactob_phiAQ113_NC_019782: hypothetical protein; PP_01605; phage(gi446730256)	6.03e-05
12	complement(7909..8535)	PHAGE_Lactob_phiAQ113_NC_019782: phage related protein; PP_01606; phage(gi446730255)	2.61e-40
13	complement(8624..8851)	hypothetical; PP_01607	0.0
14	complement(9107..9382)	hypothetical; PP_01608	0.0
15	complement(9391..9756)	hypothetical; PP_01609	0.0
16	complement(9757..10089)	hypothetical; PP_01610	0.0
17	complement(10095..10562)	hypothetical; PP_01611	0.0
18	complement(10568..12271)	PHAGE_Lactob_KC5a_NC_007924: hypothetical protein; PP_01612; phage(gi90592630)	6.92e-05
19	complement(12287..12781)	hypothetical; PP_01613	0.0
20	complement(13026..14123)	PHAGE_Lister_B054_NC_009813: gp24; PP_01614; phage(gi157325308)	2.07e-69
21	complement(14197..14448)	hypothetical; PP_01615	0.0
22	complement(14576..15055)	hypothetical; PP_01616	0.0
23	complement(15069..15968)	PHAGE_Lister_B054_NC_009813: gp21; PP_01617; phage(gi157325305)	2.20e-16
24	complement(16133..16543)	PHAGE_Lister_B054_NC_009813: gp20; PP_01618; phage(gi157325304)	6.42e-12
25	complement(16555..17589)	PHAGE_Lister_B054_NC_009813: gp19; PP_01619; phage(gi157325303)	1.04e-12
26	complement(17607..23270)	PHAGE_Lactoc_bIL286_NC_002667: tail protein; PP_01620; phage(gi13095795)	4.19e-80
27	complement(23340..23489)	hypothetical; PP_01621	0.0
28	complement(23542..23988)	hypothetical; PP_01622	0.0
29	complement(24009..24440)	PHAGE_Lister_B054_NC_009813: gp15; PP_01623; phage(gi157325299)	1.92e-16
30	complement(24455..25588)	PHAGE_Lister_B054_NC_009813: gp14; PP_01624; phage(gi157325298)	5.11e-66
31	complement(25648..26187)	PHAGE_Lactob_LBR48_NC_027990: hypothetical protein; PP_01625; phage(gi937456761)	1.84e-09
32	complement(26201..26575)	PHAGE_Lister_B054_NC_009813: gp12; PP_01626; phage(gi157325296)	9.41e-06
33	complement(26599..27192)	PHAGE_Lister_B054_NC_009813: gp11; PP_01627; phage(gi157325295)	1.97e-24
34	complement(27246..27647)	hypothetical; PP_01628	0.0
35	complement(27662..28510)	PHAGE_Lister_B054_NC_009813: gp8; PP_01629; phage(gi157325292)	1.05e-26
36	complement(28597..29202)	PHAGE_Lister_B054_NC_009813: gp7; PP_01630; phage(gi157325291)	5.77e-17
37	complement(29215..30339)	PHAGE_Lister_B054_NC_009813: gp6; PP_01631; phage(gi157325290)	6.60e-68
38	complement(30341..30700)	hypothetical; PP_01632	0.0
39	complement(30779..31474)	PHAGE_Lactob_Lc_Nu_NC_007501: putative HNH endonuclease; PP_01633; phage(gi78000020)	8.25e-36
40	31496..31636	hypothetical; PP_01634	0.0
41	complement(31652..32392)	PHAGE_Lister_B054_NC_009813: gp4; PP_01635; phage(gi157325288)	8.70e-21
42	complement(32442..33845)	PHAGE_Lister_B054_NC_009813: gp3; PP_01636; phage(gi157325287)	9.49e-49
43	complement(33860..35206)	PHAGE_Lister_B054_NC_009813: TerL; PP_01637; phage(gi157325286)	2.65e-141
44	complement(35304..35861)	PHAGE_Brocho_NF5_NC_015252: gp1; PP_01638; phage(gi327197585)	5.48e-31
45	35947..36126	hypothetical; PP_01639	0.0
46	36175..36567	PHAGE_Paenib_Harrison_NC_028746: antitoxin HicB; PP_01640; phage(gi971482390)	7.46e-15
Region 4, lcb151_contig_58, total 28 CDS
#	CDS Position	BLAST Hit	E-Value
1	complement(1008..1802)	PHAGE_Lactob_phiAQ113_NC_019782: DNA replication protein; PP_01661; phage(gi446730275)	3.98e-59
2	1148..1161	attL	0.0
3	complement(1817..2623)	PHAGE_Lactob_jlb1_NC_024206: putative replication protein; PP_01662; phage(gi971848899)	5.91e-43
4	complement(2626..3375)	PHAGE_Lactob_jlb1_NC_024206: hypothetical protein; PP_01663; phage(gi971848898)	1.04e-53
5	complement(3389..3646)	hypothetical; PP_01664	0.0
6	complement(3656..3745)	hypothetical; PP_01665	0.0
7	complement(3777..3935)	hypothetical; PP_01666	0.0
8	complement(3985..4161)	hypothetical; PP_01667	0.0
9	complement(4169..4384)	PHAGE_Brevib_Jimmer2_NC_041976: hypothetical protein; PP_01668; phage(gi100057)	6.05e-09
10	complement(4390..4638)	hypothetical; PP_01669	0.0
11	complement(4678..4905)	hypothetical; PP_01670	0.0
12	complement(4918..5214)	hypothetical; PP_01671	0.0
13	complement(5326..5460)	hypothetical; PP_01672	0.0
14	complement(5474..5611)	hypothetical; PP_01673	0.0
15	complement(5624..6367)	PHAGE_Lactob_Lj965_NC_005355: putative antirepressor; PP_01674; phage(gi41179226)	8.69e-109
16	6423..6665	PHAGE_Lactob_phiadh_NC_000896: hypothetical protein; PP_01675; phage(gi9633010)	5.05e-26
17	complement(6846..7019)	hypothetical; PP_01676	0.0
18	complement(7020..7238)	hypothetical; PP_01677	0.0
19	7491..7832	PHAGE_Lactob_phiadh_NC_000896: Rad protein; PP_01678; phage(gi9633005)	1.79e-09
20	7841..8278	PHAGE_Lactob_Lj965_NC_005355: putative repressor; PP_01679; phage(gi41179223)	2.39e-23
21	8295..8615	hypothetical; PP_01680	0.0
22	8654..8920	hypothetical; PP_01681	0.0
23	complement(8986..9099)	hypothetical; PP_01682	0.0
24	9191..9520	hypothetical; PP_01683	0.0
25	complement(9589..9927)	PHAGE_Lactob_Lj928_NC_005354: putative major head protein; PP_01684; phage(gi41179318)	2.64e-27
26	10155..10244	hypothetical; PP_01685	0.0
27	10249..11448	PHAGE_Lactob_Lj965_NC_005355: putative integrase; PP_01686; phage(gi41179218)	1.62e-73
28	13691..13704	attR	0.0
Region 5, lcb151_contig_78, total 6 CDS
#	CDS Position	BLAST Hit	E-Value
1	complement(23977..24297)	PHAGE_Burkho_ST79_NC_021343: HicB protein; PP_02578; phage(gi509141623)	1.36e-23
2	complement(24305..24580)	PHAGE_Burkho_ST79_NC_021343: HicA protein; PP_02579; phage(gi509141624)	5.06e-05
3	24605..25831	PROPHAGE_Escher_CFT073: transposase; PP_02580; phage(gi26246249)	1.52e-57
4	complement(26078..27376)	PHAGE_Gordon_Ghobes_NC_031028: DNA polymerase; PP_02581; phage(gi100036)	5.91e-20
5	complement(27380..28669)	PHAGE_Mycoba_Sebata_NC_041993: hinge connector of long tail fiber proximal connector; PP_02582; phage(gi100264)	7.13e-23
6	28825..29859	PHAGE_Staphy_42E_NC_007052: ORF012; PP_02583; phage(gi66395520)	6.83e-173
