# Supplementary material for: Characterization of the first vaginal Lactobacillus crispatus genomes isolated in Brazil
Source: PeerJ. 2021 Mar 10;9:e11079. doi: 10.7717/peerj.11079 (PMC7955673; doi:10.7717/peerj.11079)
Supplement: Supplemental Information 7 [file peerj-09-11079-s007.xlsx]

## Sheet: CRI4
CAS-TypeIIA genes						Contig	Feature
						LcB143_contig_62	CAS-TypeIIA
Cas-type/subtype	Gene status	System				LcB143_contig_62	CRISPR region 1
Csn2_0_IIA	mandatory	CAS-TypeIIA				LcB143_contig_64	CRISPR region 2
Cas2_0_I-II-III	accessory	CAS				LcB143_contig_104	CRISPR region 3
Cas1_0_II	accessory	CAS-TypeIIC
>CAS-TypeIIA|Csn2_0_IIA
ttacagtctcgttaacattaattgagcatctaaatgaatgttaaccattttcaacagctttttaatatcttcgctaaaat
caatttctaaaggtaaatcttccaaaagcaaagaatcattcaatactgtttctaatgaataaaaagattttaaaattcta
tttctgtttacctcatccaagttagaaataaagttcttaataatgacattcatatactttgccataatattgtcatttaa
caacggggctcctacaaaatcaaaactcttactaatagacttattgttgtattcgtcatcagaacatactattagatcat
ttaaggcttgaaaacctaaaaccagatctttataggcaatgggactttgagtgcaaataacattaattccatcttttaaa
cagattttcttatgtgacaaataggaaacaatcat
>CAS-TypeIIA|Cas2_0_I-II-III
tcatagtatcactgtcctgtctgaagtattgcgaatatcttttactgcatccccaaccaagaaatgcatatcactgtact
gtttttccgtaaccattagactttgcacaacacctttgctaggcataaattttcttattctcttttctaaaaaattagct
gtttgtctagtgacacatactctttcatacaccgaaaactgaatcattaaaaatccttcatttattagagcttttctaaa
ttgtcgatattcttttctttcagcggcagtgtccgtaggcaaatcaaacattatcattaatcgcat
>CAS-TypeIIA|Cas1_0_II
tcaaacattatcattaatcgcatcattcggtacctcattacacaaactcatctctattctaatatcatctgtttctccac
ttaaatatctaaggcagcttcttacatatacagaaattgcattcgttaaaattgtattcctaccattgaattttatttgt
aagctaagcaactcaactaatccatacttaatatctggtgtaaaactggtaatattttcgtgtgccttaacccaataatc
aactatggatctaaatggttccattaaatcacaagctaaattaaattgattttccactgaatgatgatgtattcccagat
aagtcaaatatccattcattgcaatttctctatcgaaggatgaaagcaatattgagtatccataatctagtgctgcatta
atcactccggaatttcttctaataaagtccttaccaaataacttcatgaaatattttctagcagccgctgcttctctatt
ggataaatcgttcacctctaacttgtacagctcttgctcaacttcagtttcatcaattcgataattttttaacaccgata
tttgattttttagcttagcagctacaattttggtccataaattttcttttcttctttcattccattcaaattgcattttc
aacttctttatgtccctagccccaggataataattcactgtctctgtaacaggttgatatttatcatcaacaaagattac
cttgcattgatttttggctaacttacttatcaaagcactagtaatcacagcctgtgatgttgaaattaaaaccaaattga
tatcttcaataggtatttgattaataccatcttttgtttggactataagcatattcatagagtatgttagctttgcatgc
tgagttattattacgttacgccatcccat
CRISPR
CRISPR_Id	CRISPR_Length	Consensus_Repeat	Nb_CRISPRs_with_same_Repeat (CRISPRdb)	Repeat_Length	Spacers_Nb	Mean_size_Spacers	Standard_Deviation_Spacers	Nb_Repeats_matching_Consensus	Ratio_Repeats_match/TotalRepeat	Conservation_Repeats (% identity)	EBcons_Repeats	Conservation_Spacers (% identity)	EBcons_Spacers	Repeat_Length_plus_mean_size_Spacers	Ratio_Repeat/mean_Spacers_Length	CRISPR_found_in_DB (if sequence IDs are similar)	Evidence_Level
1	299	gatctaaacctcattgatctaacaatcatctaaaac	0	36	4	30	0	4	0.8	81.0810810810811	88.2930579207455	12.1951219512195	14.95690549572	66	1.2	0	3
2	267	cctccacatgtgtggagaatact	0	23	4	38.25	0.5	2	0.4	82.6086956521739	78.9792179206462	21.7391304347826	19.5864674007107	61.25	0.601307189542484	0	3
3	64	tttactttataaaggaaataatatg	0	25	1	15	0	2	1	100	100	100	100	40	1.66666666666667	0	1
>1
tgttctgactcccatgatctaacaatcatctaaaacagaaaacaggtattccaggcgcgatagtgggatctaaacctcat
tgatctaacaatcatctaaaacgtttcccaacaataaaagaagtcgcccattgatctaaacctcattgatctaacaatca
tctaaaactataaatccggtccatcgtgaaaagcatttgatctaaacctcattgatctaacaatcatctaaaactagaaa
atggtttatttgtaccatcttctagatctaaacctcattgatctaacaatcatctaaaac
>2
cctccacatgtgtggagaatacttaagcctcatcttttggctgatgtaacgacttggatcacctccacatgtgtggagaa
tactaaacggctgtggcgttgacacagctcaaagtaggatcacctccacactcgtggagaatacgctaactggataccag
tcatcaccgttaacagtaggatcacctccacatacgtggagaatactctgccttgtctcccgtgcccttcaagatgatag
gatcacctccacactcgtggagaataca
>3
tttactttataaaggaaataatatgagatttttgctataatttactttataaaggaaataatatg

## Sheet: CRI8
CAS-TypeIIA genes						Contig	Feature
						LcB144_contig_41	CAS type IIA
Cas-type/subtype	Gene status	System				LcB144_contig_41	CRISPR region 1
Csn2_0_IIA	mandatory	CAS-TypeIIA				LcB144_contig_43	CRISPR region 2
Cas2_0_I-II-III	accessory	CAS				LcB144_contig_63	CRISPR region 3
Cas1_0_II	accessory	CAS-TypeIIC
>CAS-TypeIIA|Csn2_0_IIA
ttacagtctcgttaacattaattgagcatctaaatgaatgttaaccattttcaacagctttttaatatcttcgctaaaat
caatttctaaaggtaaatcttccaaaagcaaagaatcattcaatactgtttctaatgaataaaaagattttaaaattcta
tttctgtttacctcatccaagttagaaataaagttcttaataatgacattcatatactttgccataatattgtcatttaa
caacggggctcctacaaaatcaaaactcttactaatagacttattgttgtattcgtcatcagaacatactattagatcat
ttaaggcttgaaaacctaaaaccagatctttataggcaatgggactttgagtgcaaataacattaattccatcttttaaa
cagattttcttatgtgacaaataggaaacaatcat
>CAS-TypeIIA|Cas2_0_I-II-III
tcatagtatcactgtcctgtctgaagtattgcgaatatcttttactgcatccccaaccaagaaatgcatatcactgtact
gtttttccgtaaccattagactttgcacaacacctttgctaggcataaattttcttattctcttttctaaaaaattagct
gtttgtctagtgacacatactctttcatacaccgaaaactgaatcattaaaaatccttcatttattagagcttttctaaa
ttgtcgatattcttttctttcagcggcagtgtccgtaggcaaatcaaacattatcattaatcgcatcat
>CAS-TypeIIA|Cas1_0_II
tcaaacattatcattaatcgcatcattcggtacctcattacacaaactcatctctattctaatatcatctgtttctccac
ttaaatatctaaggcagcttcttacatatacagaaattgcattcgttaaaattgtattcctaccattgaattttatttgt
aagctaagcaactcaactaatccatacttaatatctggtgtaaaactggtaatattttcgtgtgccttaacccaataatc
aactatggatctaaatggttccattaaatcacaagctaaattaaattgattttccactgaatgatgatgtattcccagat
aagtcaaatatccattcattgcaatttctctatcgaaggatgaaagcaatattgagtatccataatctagtgctgcatta
atcactccggaatttcttctaataaagtccttaccaaataacttcatgaaatattttctagcagccgctgcttctctatt
ggataaatcgttcacctctaacttgtacagctcttgctcaacttcagtttcatcaattcgataattttttaacaccgata
tttgattttttagcttagcagctacaattttggtccataaattttcttttcttctttcattccattcaaattgcattttc
aacttctttatgtccctagccccaggataataattcactgtctctgtaacaggttgatatttatcatcaacaaagattac
cttgcattgatttttggctaacttacttatcaaagcactagtaatcacagcctgtgatgttgaaattaaaaccaaattga
tatcttcaataggtatttgattaataccatcttttgtttggactataagcatattcatagagtatgttagctttgcatgc
tgagttattattacgttacgccatcccat
CRISPR
CRISPR_Id	CRISPR_Length	Consensus_Repeat	Nb_CRISPRs_with_same_Repeat (CRISPRdb)	Repeat_Length	Spacers_Nb	Mean_size_Spacers	Standard_Deviation_Spacers	Nb_Repeats_matching_Consensus	Ratio_Repeats_match/TotalRepeat	Conservation_Repeats (% identity)	EBcons_Repeats	Conservation_Spacers (% identity)	EBcons_Spacers	Repeat_Length_plus_mean_size_Spacers	Ratio_Repeat/mean_Spacers_Length	CRISPR_found_in_DB (if sequence IDs are similar)	Evidence_Level
1	486	gatctaaacctcattgatctaacaatcatctaaaac	0	36	6	39.1666666666667	22.4536559755125	5	0.714285714285714	75.6756756756757	85.7012316098454	0	0	75.1666666666667	0.919148936170213	0	4
2	267	cctccacatgtgtggagaatact	0	23	4	38.25	0.5	3	0.6	82.6086956521739	79.635641835571	21.7391304347826	19.5864674007107	61.25	0.601307189542484	0	3
3	64	tttactttataaaggaaataatatg	0	25	1	15	0	1	0.5	96	96	100	100	40	1.66666666666667	0	1
>1
tgttctgactcccatgatctaacaatcatctaaaacagaaaacaggtattccaggcgcgatagtgggatctaaacctcat
tgatctaacaatcatctaaaactacctcacacccctattatttatttctttagatctaaacctcattgatctaaaaccgt
acgttggtaccgccgcaaaagctaatagatccaagcctcattgatctaacaaccatctaaaacgtcttacgcatgtaaac
gccgttttcacgggatctaaacctcattgatctaacaatcatctaaaacccgcgttaatgttgatttttctaaattcgag
atctaaacctcattgatctaacaatcatctaaaacgttcctagcagggacaagattcaagtgcttgatctaaacctcatt
gatctaacaatcatctaaaacacgtaagcaccttttgaattggagactactgatctaaacctcattgatctaacaatcat
ctaaaac
>2
cctccacatgtgtggagaatacttaagcctcatcttttggctgatgtaacgacttggatcacctccacatgtgtggagaa
tactaaacggctgtggcgttgacacagctcaaagtaggatcacctccacacacgtggagaatacgctaactggataccag
tcatcaccgttaacagtaggatcacctccacatgtgtggagaatactctgccttgtctcccgtgcccttcaagatgatag
gatcacctccacactcgtggagaataca
>3
tttactttataaaggaaataatatgagatttttgctataatttactttataaagaaaataatatg

## Sheet: CRI10
CAS-TypeIIA genes						Contig	Feature
						LcB146_contig_13	CRISPR region 1
Cas-type/subtype	Gene status	System				LcB146_contig_38	CAS type IIA
Csn2_0_IIA	mandatory	CAS-TypeIIA				LcB146_contig_38	CRISPR region 2
Cas2_0_I-II-III	accessory	CAS				LcB146_contig_39	CRISPR region 3
Cas1_0_II	accessory	CAS-TypeIIC				LcB146_contig_39	CAS type IIC
						LcB146_contig_64	CRISPR region 4
>CAS-TypeIIA|Csn2_0_IIA
ttacagtctcgttaacattaattgagcatctaaatgaatgttaaccattttcaacagctttttaatatcttcgctaaaat
caatttctaaaggtaaatcttccaaaagcaaagaatcattcaatactgtttctaatgaataaaaagattttaaaattcta
tttctgtttacctcatccaagttagaaataaagttcttaataatgacattcatatactttgccataatattgtcatttaa
caacggggctcctacaaaatcaaaactcttactaatagacttattgttgtattcgtcatcagaacatactattagatcat
ttaaggcttgaaaacctaaaaccagatctttataggcaatgggactttgagtgcaaataacattaattccatcttttaaa
cagattttcttatgtgacaaataggaaacaatcat
>CAS-TypeIIA|Cas2_0_I-II-III
tcatagtatcactgtcctgtctgaagtattgcgaatatcttttactgcatccccaaccaagaaatgcatatcactgtact
gtttttccgtaaccattagactttgcacaacacctttgctaggcataaattttcttattctcttttctaaaaaattagct
gtttgtctagtgacacatactctttcatacaccgaaaactgaatcattaaaaatccttcatttattagagcttttctaaa
ttgtcgatattcttttctttcagcggcagtgtccgtaggcaaatcaaacattatcattaatcgcat
>CAS-TypeIIA|Cas1_0_II
tcaaacattatcattaatcgcatcattcggtacctcattacacaaactcatctctattctaatatcatctgtttctccac
ttaaatatctaaggcagcttcttacatatacagaaattgcattcgttaaaattgtattcctaccattgaattttatttgt
aagctaagcaactcaactaatccatacttaatatctggtgtaaaactggtaatattttcgtgtgccttaacccaataatc
aactatggatctaaatggttccattaaatcacaagctaaattaaattgattttccactgaatgatgatgtattcccagat
aagtcaaatatccattcattgcaatttctctatcgaaggatgaaagcaatattgagtatccataatctagtgctgcatta
atcactccggaatttcttctaataaagtccttaccaaataacttcatgaaatattttctagcagccgctgcttctctatt
ggataaatcgttcacctctaacttgtacagctcttgctcaacttcagtttcatcaattcgataattttttaacaccgata
tttgattttttagcttagcagctacaattttggtccataaattttcttttcttctttcattccattcaaattgcattttc
aacttctttatgtccctagccccaggataataattcactgtctctgtaacaggttgatatttatcatcaacaaagattac
cttgcattgatttttggctaacttacttatcaaagcactagtaatcacagcctgtgatgttgaaattaaaaccaaattga
tatcttcaataggtatttgattaataccatcttttgtttggactataagcatattcatagagtatgttagctttgcatgc
tgagttattattacgttacgccatcccat
CAS-TypeIIC gene
Cas-type/subtype	Gene status	System
Cas9_0_II	mandatory	CAS-TypeIIC
>CAS-TypeIIC|Cas9_0_II
ttaaaaaaggaaatcttgatcgtttttattcatctggaagctatttttttcccagacacttaattgattattcttgatat
attcagccagcttatccttcaaatttttatttactatatctcctgatattttttggtaaatatcctgtagcttatgccct
cgtgtttgtgataacttagaatttcttctactttcacgtgcaaattcaatagctatttgtttaggtgcttgaccagaagc
agctttttgaatgtcatgaacaacttttacaacctgcctaatcattttcttatttgcaggagaagtatacgcttctgata
aaatatcttccatactatttgaatgcatgagatcttgatttgcatctgtaattgtgccttttatatctgctttatttact
atactcatgaaaatttgttggctattccacaactgctcaataatattttgaccatttgaatctacaatagcagttaacaa
ttttttagataatctgccccaaccctgaagtctaatattttgtaggaattgaatttgttttgctgtaagccaatcaattg
tttgaagcttttgtatataaatctgcttatcttcaaaaatagttgaccattcaataattttttcaaaatcatcacgaaat
tcatttgagtcaagtttatcaacaaataaacctgacttttttaatttaatgtatgtagataaactagaattaaatttagt
ttgatcagctaaccccttaattttgatataaggcaatttctgattttctattaaccaatttttaagctgcttagctgaga
cagtattattctttttgaataagtcctcataaagttcttgctttacgctaacagataatttcttcccattcacactaatt
ttatttaattcatccaaaacagtatatttttgatataaaagactatttgctggaagaacatcttcaccaaacaaataagt
atcttttgttgtaagtcgtttaataaagttatttgcagacttttgtctatcaactttttcatcaaaattccaaggcgtaa
ttcgacctttagcttttctaaccatccaagcaaaagattgattttgtcgagtttgaggataagatgaatttgttggttca
atcattggaccaacatagtatggcaccctaaaacgaatcagttcatcaagcttataaggtgcctgcatacgatgagcttt
aattggattaatctcttttaaaaatggataatattttccctgattttcaattatcttatctagctcgatttgattaagct
ggaagggaattacgccgttttcatcgcttcgttgcttaggcataaacttatctaacgctatttcttttctaatttgaact
gcctcttttgatgcatccaaattctttttaactatttcataaaaatcgctttttcgataaaggtgcttgttgggaaaggc
ttttttagtttcaacatcaacaaaatgacggttattgacatatttgtcgtaagccaactgtaaattgtgagcttttttcc
tgtctgaatggttcttgattactgtttttagcaatttcaaatcttgggcatgatcgttatattttcttatcatagattcc
gataaagttgaaccttcatcgacaatattcagtagagaaattgcactaaataagtttctaactaaatccaatatctgtaa
ctgagtatcagttaaatcagaagtaatttcactcaaatttacatccgcattttcatcatttaatttaaaattccaaattg
agctgtcagtcttgtctacatttacttgtaaaataatttcaaattttgctttgtatcctaaaattgctttgctaatttct
tttgaaatttttttacttagttttagaccagacttattttcagtgtcgggtaacacatcagcaatttcttttatcttatc
cagtttaaacatttgttcatttcgaataatgtcttcaacttttgaagcatttcctgcatcaaaaatcactccactttctg
gcagaaatatggaataaagatcgtttagttcatttacaaacctatcgatttcaatctttgacgcactaaaattacttatg
gatgaattagacaaaaaatttcctcgatatttcacgatatgatgaatggcaatataaatagcccgaagatcaaacttctt
atcctgtttcattaaagcgtttcttaaatgataaatagttggaaattttttataaaattgtttatccatttttttagttg
gaaagacaattgaagacacatttttccttgtgtccaatggagaaagtcctgactcttttaaacgagcaaagaaatttgga
tctacctttgccatttcttcatcaaaaatttcttccaacaatttaagacgccattttcttcgctttatacgcctcctagt
agttctaaaagctcgtctatcagcagctgatacgccttcatcaaacaagtgcgagccaagtgctctttttccatgcattt
ttaatatattattatcaaaatcagtagcaacccacccacatgaattagtaccaatatctagaccaaccatatattcatta
tttaacttcgtcat
CRISPR
CRISPR_Id	CRISPR_Length	Consensus_Repeat	Nb_CRISPRs_with_same_Repeat (CRISPRdb)	Repeat_Length	Spacers_Nb	Mean_size_Spacers	Standard_Deviation_Spacers	Nb_Repeats_matching_Consensus	Ratio_Repeats_match/TotalRepeat	Conservation_Repeats (% identity)	EBcons_Repeats	Conservation_Spacers (% identity)	EBcons_Spacers	Repeat_Length_plus_mean_size_Spacers	Ratio_Repeat/mean_Spacers_Length	CRISPR_found_in_DB (if sequence IDs are similar)	Evidence_Level
1	117	gctaataattctacagaagctgcgacaaccccacaatctt	0	40	1	38	0	1	0.5	97.5	97.5	100	100	78	1.05263157894737	0	1
2	486	gatctaaacctcattgatctaacaatcatctaaaac	0	36	6	39.1666666666667	22.4536559755125	5	0.714285714285714	69.4444444444444	81.1670879044725	0	0	75.1666666666667	0.919148936170213	0	4
3	267	cctccacatgtgtggagaatact	0	23	4	38.25	0.5	3	0.6	82.6086956521739	79.635641835571	21.7391304347826	19.5864674007107	61.25	0.601307189542484	0	3
4	64	tttactttataaaggaaataatatg	0	25	1	15	0	2	1	100	100	100	100	40	1.66666666666667	0	1
>1
gctaataattctacagaagctgcgacaaccccacaatcttcaccagaaacgcaaggtagtgcaagtaacaatgcaacggc
taataattctacagaagctgcgacaacctcacaatctt
>2 LcB146_contig_38				same contig as Cas-type IIA
tgttctgactcccatgatctaacaatcatctaaaacagaaaacaggtattccaggcgcgatagtgggatctaaacctcat
tgatctaacaatcatctaaaactacctcacacctctattatttatttctttagatctaaacctcattgatctaaaaccgt
acgttggtaccgccgcaaaagctaatagatccaaacctcattgatctaacaaccatctaaaacgtcttacgcatgtaaac
gccgttttcacgggatctaaacctcattgatctaacaatcatctaaaacccgcgttaatgttgatttttctaaattcgag
atctaaacctcattgatctaacaatcatctaaaacgttcctagcagggacaagattcaagtgcttgatctaaacctcatt
gatctaacaatcatctaaaacacgtaagcaccttttgaattggagactactgatctaaacctcattgatctaacaatcat
ctaaaac
>3
cctccacatgtgtggagaatacttaagcctcatcttttggctgatgtaacgacttggatcacctccacatgtgtggagaa
tactaaacggctgtggcgttgacacagctcaaagtaggatcacctccacacacgtggagaatacgctaactggataccag
tcatcaccgttaacagtaggatcacctccacatgtgtggagaatactctgccttgtctcccgtgcccttcaagatgatag
gatcacctccacactcgtggagaataca
>4
tttactttataaaggaaataatatgagatttttgctataatttactttataaaggaaataatatg

## Sheet: CRI17
CAS-TypeIIA genes						Contig	Feature
						LcB151_contig_13	CRISPR region 1
Cas-type/subtype	Gene status	System				LcB151_contig_54	CAS-TypeIIA
Csn2_0_IIA	mandatory	CAS-TypeIIA				LcB151_contig_54	CRISPR region 2
Cas2_0_I-II-III	accessory	CAS				LcB151_contig_55	CRISPR region 3
Cas1_0_II	accessory	CAS-TypeIIC				LcB151_contig_79	CRISPR region 4
Cas9_0_II	accessory	CAS-TypeIIC
>CAS-TypeIIA|Csn2_0_IIA
ttacagtctcgttaacattaattgagcatctaaatgaatgttaaccattttcaacagctttttaatatcttcgctaaaat
caatttctaaaggtaaatcttccaaaagcaaagaatcattcaatactgtttctaatgaataaaaagattttaaaattcta
tttctgtttacctcatccaagttagaaataaagttcttaataatgacattcatatactttgccataatattgtcatttaa
caacggggctcctacaaaatcaaaactcttactaatagacttattgttgtattcgtcatcagaacatactattagatcat
ttaaggcttgaaaacctaaaaccagatctttataggcaatgggactttgagtgcaaataacattaattccatcttttaaa
cagattttcttatgtgacaaataggaaacaatcat
>CAS-TypeIIA|Cas2_0_I-II-III
tcatagtatcactgtcctgtctgaagtattgcgaatatcttttactgcatccccaaccaagaaatgcatatcactgtact
gtttttccgtaaccattagactttgcacaacacctttgctaggcataaattttcttattctcttttctaaaaaattagct
gtttgtctagtgacacatactctttcatacaccgaaaactgaatcattaaaaatccttcatttattagagcttttctaaa
ttgtcgatattcttttctttcagcggcagtgtccgtaggcaaatcaaacattatcattaatcgcat
>CAS-TypeIIA|Cas1_0_II
tcaaacattatcattaatcgcatcattcggtacctcattacacaaactcatctctattctaatatcatctgtttctccac
ttaaatatctaaggcagcttcttacatatacagaaattgcattcgttaaaattgtattcctaccattgaattttatttgt
aagctaagcaactcaactaatccatacttaatatctggtgtaaaactggtaatattttcgtgtgccttaacccaataatc
aactatggatctaaatggttccattaaatcacaagctaaattaaattgattttccactgaatgatgatgtattcccagat
aagtcaaatatccattcattgcaatttctctatcgaaggatgaaagcaatattgagtatccataatctagtgctgcatta
atcactccggaatttcttctaataaagtccttaccaaataacttcatgaaatattttctagcagccgctgcttctctatt
ggataaatcgttcacctctaacttgtacagctcttgctcaacttcagtttcatcaattcgataattttttaacaccgata
tttgattttttagcttagcagctacaattttggtccataaattttcttttcttctttcattccattcaaattgcattttc
aacttctttatgtccctagccccaggataataattcactgtctctgtaacaggttgatatttatcatcaacaaagattac
cttgcattgatttttggctaacttacttatcaaagcactagtaatcacagcctgtgatgttgaaattaaaaccaaattga
tatcttcaataggtatttgattaataccatcttttgtttggactataagcatattcatagagtatgttagctttgcatgc
tgagttattattacgttacgccatcccat
>CAS-TypeIIA|Cas9_0_II
ttaaaaaaggaaatcttgatcgtttttattcatctggaagctatttttttcccagacacttaattgattattcttgatat
attcagccagcttatccttcaaatttttatttactatatctcctgatattttttggtaaatatcctgtagcttatgccct
cgtgtttgtgataacttagaatttcttctactttcacgtgcaaattcaatagctatttgtttaggtgcttgaccagaagc
agctttttgaatgtcatgaacaacttttacaacctgcctaatcattttcttatttgcaggagaagtatacgcttctgata
aaatatcttccatactatttgaatgcatgagatcttgatttgcatctgtaattgtgccttttatatctgctttatttact
atactcatgaaaatttgttggctattccacaactgctcaataatattttgaccatttgaatctacaatagcagttaacaa
ttttttagataatctgccccaaccctgaagtctaatattttgtaggaattgaatttgttttgctgtaagccaatcaattg
tttgaagcttttgtatataaatctgcttatcttcaaaaatagttgaccattcaataattttttcaaaatcatcacgaaat
tcatttgagtcaagtttatcaacaaataaacctgacttttttaatttaatgtatgtagataaactagaattaaatttagt
ttgatcagctaaccccttaattttgatataaggcaatttctgattttctattaaccaatttttaagctgcttagctgaga
cagtattattctttttgaataagtcctcataaagttcttgctttacgctaacagataatttcttcccattcacactaatt
ttatttaattcatccaaaacagtatatttttgatataaaagactatttgctggaagaacatcttcaccaaacaaataagt
atcttttgttgtaagtcgtttaataaagttatttgcagacttttgtctatcaactttttcatcaaaattccaaggcgtaa
ttcgacctttagcttttctaaccatccaagcaaaagattgattttgtcgagtttgaggataagatgaatttgttggttca
atcattggaccaacatagtatggcaccctaaaacgaatcagttcatcaagcttataaggtgcctgcatacgatgagcttt
aattggattaatctcttttaaaaatggataatattttccctgattttcaattatcttatctagctcgatttgattaagct
ggaagggaattacgccgttttcatcgcttcgttgcttaggcataaacttatctaacgctatttcttttctaatttgaact
gcctcttttgatgcatccaaattctttttaactatttcataaaaatcgctttttcgataaaggtgcttgttgggaaaggc
ttttttagtttcaacatcaacaaaatgacggttattgacatatttgtcgtaagccaactgtaaattgtgagcttttttcc
tgtctgaatggttcttgattactgtttttagcaatttcaaatcttgggcatgatcgttatattttcttatcatagattcc
gataaagttgaaccttcatcgacaatattcagtagagaaattgcactaaataagtttctaactaaatccaatatctgtaa
ctgagtatcagttaaatcagaagtaatttcactcaaatttacatccgcattttcatcatttaatttaaaattccaaattg
agctgtcagtcttgtctacatttacttgtaaaataatttcaaattttgctttgtatcctaaaattgctttgctaatttct
tttgaaatttttttacttagttttagaccagacttattttcagtgtcgggtaacacatcagcaatttcttttatcttatc
cagtttaaacatttgttcatttcgaataatgtcttcaacttttgaagcatttcctgcatcaaaaatcactccactttctg
gcagaaatatggaataaagatcgtttagttcatttacaaacctatcgatttcaatctttgacgcactaaaattacttatg
gatgaattagacaaaaaatttcctcgatatttcacgatatgatgaatggcaatataaatagcccgaagatcaaacttctt
atcctgtttcattaaagcgtttcttaaatgataaatagttggaaattttttataaaattgtttatccatttttttagttg
gaaagacaattgaagacacatttttccttgtgtccaatggagaaagtcctgactcttttaaacgagcaaagaaatttgga
tctacctttgccatttcttcatcaaaaatttcttccaacaatttaagacgccattttcttcgctttatacgcctcctagt
agttctaaaagctcgtctatcagcagctgatacgccttcatcaaacaagtgcgagccaagtgctctttttccatgcat
CRISPR
CRISPR_Id	CRISPR_Length	Consensus_Repeat	Nb_CRISPRs_with_same_Repeat (CRISPRdb)	Repeat_Length	Spacers_Nb	Mean_size_Spacers	Standard_Deviation_Spacers	Nb_Repeats_matching_Consensus	Ratio_Repeats_match/TotalRepeat	Conservation_Repeats (% identity)	EBcons_Repeats	Conservation_Spacers (% identity)	EBcons_Spacers	Repeat_Length_plus_mean_size_Spacers	Ratio_Repeat/mean_Spacers_Length	CRISPR_found_in_DB (if sequence IDs are similar)	Evidence_Level
1	117	gctaataattctacagaagctgcgacaaccccacaatctt	0	40	1	38	0	1	0.5	97.5	97.5	100	100	78	1.05263157894737	0	1
2	486	gatctaaacctcattgatctaacaatcatctaaaac	0	36	6	39.1666666666667	22.4536559755125	5	0.714285714285714	78.3783783783784	88.8061906754695	0	0	75.1666666666667	0.919148936170213	0	4
3	267	cctccacatgtgtggagaatact	0	23	4	38.25	0.5	3	0.6	82.6086956521739	79.635641835571	21.7391304347826	19.5864674007107	61.25	0.601307189542484	0	3
4	64	tttactttataaaggaaataatatg	0	25	1	15	0	2	1	100	100	100	100	40	1.66666666666667	0	1
>1
gctaataattctacagaagctgcgacaaccccacaatcttcaccagaaacgcaaggtagtgcaagtaacaatgcaacggc
taataattctacagaagctgcgacaacctcacaatctt
>2
tgttctgactcccatgatctaacaatcatctaaaacagaaaacaggtattccaggcgcgatagtgggatctaaacctcat
tgatctaacaatcatctaaaactacctcacacctctattatttatttctttagatctaaacctcattgatctaaaaccgt
acgttggtaccgccgcaaaagctaatagatctaaacctcattgatctaacaaccatctaaaacgtcttacgcatgtaaac
gccgttttcacgggatctaaacctcattgatctaacaatcatctaaaacccgcgttaatgttgatttttctaaattcgag
atctaaacctcattgatctaacaatcatctaaaacgttcctagcagggacaagattcaagtgcttgatctaaacctcatt
gatctaacaatcatctaaaacacgtaagcaccttttgaattggagactactgatctaaacctcattgatctaacaatcat
ctaaaac
>3
cctccacatgtgtggagaatacttaagcctcatcttttggctgatgtaacgacttggatcacctccacatgtgtggagaa
tactaaacggctgtggcgttgacacagctcaaagtaggatcacctccacacacgtggagaatacgctaactggataccag
tcatcaccgttaacagtaggatcacctccacatgtgtggagaatactctgccttgtctcccgtgcccttcaagatgatag
gatcacctccacactcgtggagaataca
>4
tttactttataaaggaaataatatgagatttttgctataatttactttataaaggaaataatatg
