# Supplementary material for: Characterization of the first vaginal Lactobacillus crispatus genomes isolated in Brazil
Source: PeerJ. 2021 Mar 10;9:e11079. doi: 10.7717/peerj.11079 (PMC7955673; doi:10.7717/peerj.11079)
Supplement: Supplemental Information 8 [file peerj-09-11079-s008.xlsx]

## Sheet: statistical results
Cluster_name	m78	m12	lnLm7	lnLm8	lnLm1	lnLm2	D(m78)	D(m12)	p_value(m78)	p_value(m12)	q_value(m78)	q_value(m12)				- final classification for nested models M1a2 and M78:
ORTHOMCL56	P	P	-1720.747639	-1702.178320	-1720.372945	-1702.178320	37.138638	36.389250	0.000000	0.000000	0.000003	0.000004
ORTHOMCL2958	P	P	-694.711726	-678.077206	-695.081573	-678.077204	33.269040	34.008738	0.000000	0.000000	0.000011	0.000007				- "P" for groups with q-values smaller than the cutoff.
ORTHOMCL1635	P	P	-987.946369	-976.603785	-987.997404	-976.603719	22.685168	22.787370	0.000012	0.000011	0.001233	0.001176
ORTHOMCL2745	P	P	-370.403184	-359.210651	-370.432044	-359.210648	22.385066	22.442792	0.000014	0.000013	0.001233	0.001176				- "u" for groups with q-values greater than the cutoff and p-values smaller
ORTHOMCL1729	P	P	-2678.602975	-2668.603876	-2678.718084	-2668.639096	19.998198	20.157976	0.000045	0.000042	0.003254	0.002950
ORTHOMCL2191	P	P	-587.155051	-578.347828	-587.185701	-578.350628	17.614446	17.670146	0.000150	0.000146	0.008929	0.008528				than the cutoff.
ORTHOMCL2681	P	P	-1187.629746	-1180.288906	-1187.651385	-1180.248305	14.681680	14.806160	0.000649	0.000609	0.033167	0.030606
ORTHOMCL1657	u	u	-317.940383	-312.150240	-318.065681	-312.153728	11.580286	11.823906	0.003057	0.002707	0.136823	0.095169				- "n" for negative groups.
ORTHOMCL2432	u	u	-716.937365	-711.997844	-718.188083	-711.891900	9.879042	12.592366	0.007158	0.001843	0.252927	0.072007
ORTHOMCL2080	u	u	-1673.409919	-1668.552631	-1674.343736	-1668.539856	9.714576	11.607760	0.007771	0.003016	0.252927	0.096390				- "-" for groups where it was not possible to compute p-values.
ORTHOMCL2054	u	u	-916.563831	-911.597859	-916.664508	-912.192275	9.931944	8.944466	0.006971	0.011422	0.252927	0.250983
ORTHOMCL2757	u	u	-2647.967974	-2643.660650	-2648.147169	-2643.653032	8.614648	8.988274	0.013470	0.011174	0.401855	0.250983
ORTHOMCL2532	u	P	-2208.412073	-2204.579041	-2209.751707	-2202.830845	7.666064	13.841724	0.021644	0.000987	0.553468	0.043375
ORTHOMCL1976	u	u	-723.243109	-719.365960	-723.247855	-719.422378	7.754298	7.650954	0.020710	0.021808	0.553468	0.409812				- -lnL values for models evaluated (M1a, M2, M7, M8a, M8). Possible
ORTHOMCL2051	u	u	-1441.605837	-1438.012246	-1441.610700	-1438.147420	7.187182	6.926560	0.027499	0.031327	0.615290	0.517284
ORTHOMCL2127	u	u	-310.984812	-307.362639	-311.227419	-307.362678	7.244346	7.729482	0.026725	0.020968	0.615290	0.409812				values are a negative number, and "-" for groups where it was not
ORTHOMCL2722	u	u	-282.138460	-278.715775	-282.146322	-278.715774	6.845370	6.861096	0.032625	0.032369	0.665721	0.517284
ORTHOMCL2824	u	u	-430.521865	-427.124807	-430.570663	-427.124802	6.794116	6.891722	0.033472	0.031877	0.665721	0.517284				possible to compute a -lnL value.
ORTHOMCL33	u	u	-4024.476721	-4021.151684	-4026.624234	-4021.174656	6.650074	10.899156	0.035971	0.004298	0.677769	0.116240
ORTHOMCL2297	u	n	-604.113340	-601.010259	-604.124841	-601.509822	6.206162	5.230038	0.044911	0.073166	0.803907	0.887022
ORTHOMCL1948	n	n	-765.464375	-765.464411	-765.499387	-765.464371	-0.000072	0.070032	1.000000	0.965590	1.000000	0.982064
ORTHOMCL2208	n	n	-1161.801910	-1161.727580	-1161.801247	-1161.727570	0.148660	0.147354	0.928370	0.928970	1.000000	0.982064				- D values, the difference of likelihoods for neutral models (M1a, M7
ORTHOMCL60	n	n	-270.143928	-270.143898	-270.143894	-270.144148	0.000060	-0.000508	0.999970	1.000000	1.000000	0.982064
ORTHOMCL2413	n	n	-718.395364	-718.395364	-718.395457	-718.398369	0.000000	-0.005824	1.000000	1.000000	1.000000	0.982064				and M8a) when compared with models that allow sites under positive
ORTHOMCL2428	n	n	-318.149264	-318.149185	-318.161604	-318.161683	0.000158	-0.000158	0.999920	1.000000	1.000000	0.982064
ORTHOMCL1800	n	n	-865.515631	-865.349094	-865.573162	-865.224012	0.333074	0.698300	0.846590	0.705290	1.000000	0.982064				selection (M2, M8 and M8, respectively).
ORTHOMCL1825	n	n	-1297.649539	-1297.649602	-1297.476067	-1297.476528	-0.000126	-0.000922	1.000000	1.000000	1.000000	0.982064
ORTHOMCL2181	n	n	-557.034545	-557.034545	-557.034545	-557.035983	0.000000	-0.002876	1.000000	1.000000	1.000000	0.982064
ORTHOMCL2095	n	n	-267.441574	-267.441573	-267.441649	-267.441403	0.000002	0.000492	1.000000	0.999750	1.000000	0.982064
ORTHOMCL77	n	n	-1618.966570	-1618.026754	-1619.077713	-1618.019711	1.879632	2.116004	0.390700	0.347150	1.000000	0.982064				- p-values computed for each pair of nested models evaluated.
ORTHOMCL53	n	n	-658.472066	-657.596182	-659.001883	-657.597151	1.751768	2.809464	0.416490	0.245430	1.000000	0.982064
ORTHOMCL2146	n	n	-286.041456	-286.047964	-286.047926	-285.946435	-0.013016	0.202982	1.000000	0.903490	1.000000	0.982064				Calculated through a Likelihood Ratio Test (LRT).
ORTHOMCL1838	n	n	-1445.281287	-1445.176733	-1445.295719	-1445.175649	0.209108	0.240140	0.900730	0.886860	1.000000	0.982064
ORTHOMCL2957	n	n	-1679.343233	-1679.343227	-1679.343500	-1679.343505	0.000012	-0.000010	0.999990	1.000000	1.000000	0.982064
ORTHOMCL2609	n	n	-506.805964	-506.805490	-506.805490	-506.805958	0.000948	-0.000936	0.999530	1.000000	1.000000	0.982064
ORTHOMCL2905	n	n	-384.367618	-384.367514	-384.367625	-384.367652	0.000208	-0.000054	0.999900	1.000000	1.000000	0.982064				- q-values computed for each pair of nested models evaluated.
ORTHOMCL1941	n	n	-658.833082	-658.822381	-658.835406	-658.822379	0.021402	0.026054	0.989360	0.987060	1.000000	0.982064
ORTHOMCL2286	n	n	-1476.505936	-1476.505936	-1476.511374	-1476.509059	0.000000	0.004630	1.000000	0.997690	1.000000	0.982064				Calculated through a False Discovery Rate correction.
ORTHOMCL2730	n	n	-960.925152	-960.925131	-960.925294	-960.925173	0.000042	0.000242	0.999980	0.999880	1.000000	0.982064
ORTHOMCL48	n	u	-2455.845934	-2453.932466	-2459.451001	-2453.942995	3.826936	11.016012	0.147570	0.004054	1.000000	0.116240
ORTHOMCL2631	n	n	-616.661209	-616.661209	-617.602511	-616.700331	0.000000	1.804360	1.000000	0.405680	1.000000	0.982064
ORTHOMCL2482	n	n	-623.242761	-623.242761	-623.242941	-623.242942	0.000000	-0.000002	1.000000	1.000000	1.000000	0.982064
ORTHOMCL2129	n	n	-638.086245	-638.086245	-637.897222	-637.897738	0.000000	-0.001032	1.000000	1.000000	1.000000	0.982064
ORTHOMCL1768	n	n	-598.403384	-596.457566	-598.632202	-596.457561	3.891636	4.349282	0.142870	0.113650	1.000000	0.982064
ORTHOMCL2403	n	n	-253.671266	-252.457523	-253.684556	-252.457519	2.427486	2.454074	0.297080	0.293160	1.000000	0.982064
ORTHOMCL3028	n	n	-443.452644	-443.186369	-443.461128	-443.186369	0.532550	0.549518	0.766230	0.759760	1.000000	0.982064
ORTHOMCL2755	n	n	-344.609349	-344.609348	-344.609416	-344.609416	0.000002	0.000000	1.000000	1.000000	1.000000	0.982064
ORTHOMCL2833	n	n	-533.502166	-533.502256	-533.501262	-533.501444	-0.000180	-0.000364	1.000000	1.000000	1.000000	0.982064
ORTHOMCL2234	n	n	-1039.040687	-1038.517918	-1039.040687	-1038.517787	1.045538	1.045800	0.592880	0.592800	1.000000	0.982064
ORTHOMCL2580	n	n	-1442.526400	-1442.523860	-1442.523860	-1442.527091	0.005080	-0.006462	0.997460	1.000000	1.000000	0.982064
ORTHOMCL1804	n	n	-346.214189	-346.217599	-346.214188	-346.214191	-0.006820	-0.000006	1.000000	1.000000	1.000000	0.982064
ORTHOMCL1646	n	n	-480.005196	-479.422151	-480.292106	-479.209804	1.166090	2.164604	0.558200	0.338810	1.000000	0.982064
ORTHOMCL14	n	n	-1151.277933	-1150.174504	-1151.319269	-1150.174502	2.206858	2.289534	0.331730	0.318300	1.000000	0.982064
ORTHOMCL2781	n	n	-207.332326	-207.332425	-207.332507	-207.332424	-0.000198	0.000166	1.000000	0.999920	1.000000	0.982064
ORTHOMCL2688	n	n	-591.549294	-591.549237	-591.548251	-591.548252	0.000114	-0.000002	0.999940	1.000000	1.000000	0.982064
ORTHOMCL2214	n	n	-3733.348640	-3732.321183	-3734.314109	-3732.324942	2.054914	3.978334	0.357920	0.136810	1.000000	0.982064
ORTHOMCL2063	n	n	-2102.653928	-2102.653869	-2102.655492	-2102.654070	0.000118	0.002844	0.999940	0.998580	1.000000	0.982064
ORTHOMCL2964	n	n	-731.274204	-731.273960	-731.296312	-731.296555	0.000488	-0.000486	0.999760	1.000000	1.000000	0.982064
ORTHOMCL2137	n	n	-1263.991651	-1263.988537	-1263.994147	-1263.988538	0.006228	0.011218	0.996890	0.994410	1.000000	0.982064
ORTHOMCL1845	n	n	-835.626749	-833.979225	-835.640779	-833.979224	3.295048	3.323110	0.192530	0.189840	1.000000	0.982064
ORTHOMCL974	n	n	-983.344018	-983.344210	-983.353373	-983.344200	-0.000384	0.018346	1.000000	0.990870	1.000000	0.982064
ORTHOMCL2294	n	n	-677.720480	-677.629882	-677.753960	-677.653328	0.181196	0.201264	0.913380	0.904270	1.000000	0.982064
ORTHOMCL1484	n	n	-756.164331	-756.164304	-756.169836	-756.169865	0.000054	-0.000058	0.999970	1.000000	1.000000	0.982064
ORTHOMCL2488	n	n	-2642.110621	-2641.716815	-2642.145701	-2641.723397	0.787612	0.844608	0.674480	0.655530	1.000000	0.982064
ORTHOMCL1924	n	u	-1876.044485	-1874.253806	-1877.398738	-1874.255924	3.581358	6.285628	0.166850	0.043161	1.000000	0.659761
ORTHOMCL1738	n	n	-410.042945	-409.999405	-410.112161	-410.001373	0.087080	0.221576	0.957390	0.895130	1.000000	0.982064
ORTHOMCL2585	n	n	-243.252824	-242.647888	-243.252824	-242.691772	1.209872	1.122104	0.546110	0.570610	1.000000	0.982064
ORTHOMCL2489	n	n	-713.994313	-713.994291	-713.994289	-713.994967	0.000044	-0.001356	0.999980	1.000000	1.000000	0.982064
ORTHOMCL7	n	n	-1872.653590	-1872.653609	-1870.396181	-1870.396445	-0.000038	-0.000528	1.000000	1.000000	1.000000	0.982064
ORTHOMCL2061	n	n	-528.818907	-528.819040	-528.818841	-528.818901	-0.000266	-0.000120	1.000000	1.000000	1.000000	0.982064
ORTHOMCL1677	n	n	-581.497567	-580.478226	-583.159211	-580.523488	2.038682	5.271446	0.360830	0.071667	1.000000	0.887022
ORTHOMCL2816	n	n	-899.701243	-899.701194	-899.704023	-899.704072	0.000098	-0.000098	0.999950	1.000000	1.000000	0.982064
ORTHOMCL2205	n	n	-583.557119	-583.557119	-583.557119	-583.507037	0.000000	0.100164	1.000000	0.951150	1.000000	0.982064
ORTHOMCL1839	n	n	-863.253132	-863.252840	-863.107740	-863.108242	0.000584	-0.001004	0.999710	1.000000	1.000000	0.982064
ORTHOMCL2252	n	n	-916.137526	-915.719409	-916.137526	-915.719410	0.836234	0.836232	0.658290	0.658290	1.000000	0.982064
ORTHOMCL2387	n	n	-2365.990278	-2365.514585	-2365.990279	-2365.514585	0.951386	0.951388	0.621450	0.621450	1.000000	0.982064
ORTHOMCL2505	n	n	-440.475832	-440.095914	-440.475832	-439.995608	0.759836	0.960448	0.683920	0.618640	1.000000	0.982064
ORTHOMCL16	n	n	-1393.102553	-1392.723458	-1393.102553	-1392.723458	0.758190	0.758190	0.684480	0.684480	1.000000	0.982064
ORTHOMCL1883	n	n	-279.026119	-279.026075	-279.028452	-279.028495	0.000088	-0.000086	0.999960	1.000000	1.000000	0.982064
ORTHOMCL2700	n	n	-469.692727	-469.691986	-469.691986	-469.691986	0.001482	0.000000	0.999260	1.000000	1.000000	0.982064
ORTHOMCL1719	n	n	-526.993817	-526.993756	-527.007101	-527.007162	0.000122	-0.000122	0.999940	1.000000	1.000000	0.982064
ORTHOMCL1793	n	n	-312.192712	-312.193327	-312.193127	-312.192802	-0.001230	0.000650	1.000000	0.999680	1.000000	0.982064
ORTHOMCL166	n	n	-987.280127	-987.061673	-987.513513	-987.066157	0.436908	0.894712	0.803760	0.639320	1.000000	0.982064
ORTHOMCL2097	n	n	-1034.540899	-1034.543301	-1034.540912	-1034.540957	-0.004804	-0.000090	1.000000	1.000000	1.000000	0.982064
ORTHOMCL2831	n	n	-683.866382	-683.866289	-683.883197	-683.883289	0.000186	-0.000184	0.999910	1.000000	1.000000	0.982064
ORTHOMCL2218	n	n	-570.979186	-570.389455	-570.977523	-570.389455	1.179462	1.176136	0.554480	0.555400	1.000000	0.982064
ORTHOMCL2164	n	n	-640.848379	-640.001181	-640.848281	-640.001181	1.694396	1.694200	0.428610	0.428660	1.000000	0.982064
ORTHOMCL2090	n	n	-464.609764	-464.609414	-464.609374	-464.609718	0.000700	-0.000688	0.999650	1.000000	1.000000	0.982064
ORTHOMCL43	n	n	-1195.493817	-1194.588500	-1195.494294	-1194.587550	1.810634	1.813488	0.404410	0.403840	1.000000	0.982064
ORTHOMCL2148	n	n	-572.300943	-572.300944	-572.303322	-572.301077	-0.000002	0.004490	1.000000	0.997760	1.000000	0.982064
ORTHOMCL2276	n	n	-289.730654	-289.730643	-289.730651	-289.730755	0.000022	-0.000208	0.999990	1.000000	1.000000	0.982064
ORTHOMCL2433	n	n	-352.708794	-352.708766	-352.711173	-352.711201	0.000056	-0.000056	0.999970	1.000000	1.000000	0.982064
ORTHOMCL1488	n	n	-386.232344	-386.232344	-385.496988	-385.497001	0.000000	-0.000026	1.000000	1.000000	1.000000	0.982064
ORTHOMCL1872	n	n	-445.984818	-445.984818	-445.896617	-445.894446	0.000000	0.004342	1.000000	0.997830	1.000000	0.982064
ORTHOMCL2107	n	n	-440.455898	-440.455892	-440.458941	-440.458950	0.000012	-0.000018	0.999990	1.000000	1.000000	0.982064
ORTHOMCL2785	n	n	-642.358623	-642.358622	-642.358692	-642.367172	0.000002	-0.016960	1.000000	1.000000	1.000000	0.982064
ORTHOMCL2444	n	n	-1815.676836	-1815.500874	-1815.676836	-1815.500874	0.351924	0.351924	0.838650	0.838650	1.000000	0.982064
ORTHOMCL2434	n	n	-483.920410	-483.939444	-483.939239	-483.918501	-0.038068	0.041476	1.000000	0.979480	1.000000	0.982064
ORTHOMCL1681	n	n	-434.523402	-434.523402	-434.523444	-434.528104	0.000000	-0.009320	1.000000	1.000000	1.000000	0.982064
ORTHOMCL1833	n	n	-1343.616577	-1343.616487	-1343.960611	-1343.506120	0.000180	0.908982	0.999910	0.634770	1.000000	0.982064
ORTHOMCL2479	n	n	-353.636233	-353.226361	-353.641164	-353.226359	0.819744	0.829610	0.663740	0.660470	1.000000	0.982064
ORTHOMCL2574	n	n	-357.899456	-357.899375	-357.915666	-357.915747	0.000162	-0.000162	0.999920	1.000000	1.000000	0.982064
ORTHOMCL2161	n	n	-714.903469	-714.903165	-714.934115	-714.934418	0.000608	-0.000606	0.999700	1.000000	1.000000	0.982064
ORTHOMCL1591	n	n	-488.082401	-488.082402	-488.103307	-488.103371	-0.000002	-0.000128	1.000000	1.000000	1.000000	0.982064
ORTHOMCL2160	n	n	-297.655899	-297.655851	-297.661995	-297.662042	0.000096	-0.000094	0.999950	1.000000	1.000000	0.982064
ORTHOMCL2274	n	n	-768.791070	-768.646888	-768.791069	-768.646888	0.288364	0.288362	0.865730	0.865730	1.000000	0.982064
ORTHOMCL44	n	n	-2243.368570	-2243.368821	-2243.219263	-2243.219313	-0.000502	-0.000100	1.000000	1.000000	1.000000	0.982064
ORTHOMCL2417	n	n	-493.203222	-493.203270	-493.203686	-493.203088	-0.000096	0.001196	1.000000	0.999400	1.000000	0.982064
ORTHOMCL2546	n	n	-630.342550	-630.341667	-630.341667	-630.341667	0.001766	0.000000	0.999120	1.000000	1.000000	0.982064
ORTHOMCL2743	n	n	-870.545265	-870.558912	-870.559195	-870.545592	-0.027294	0.027206	1.000000	0.986490	1.000000	0.982064
ORTHOMCL2652	n	n	-1612.800857	-1612.798936	-1612.800950	-1612.801299	0.003842	-0.000698	0.998080	1.000000	1.000000	0.982064
ORTHOMCL1925	n	n	-721.376166	-720.974360	-721.376166	-720.970235	0.803612	0.811862	0.669110	0.666360	1.000000	0.982064
ORTHOMCL1799	n	n	-334.507851	-334.504819	-334.504263	-334.504264	0.006064	-0.000002	0.996970	1.000000	1.000000	0.982064
ORTHOMCL2889	n	n	-839.278683	-839.278683	-839.624454	-839.518666	0.000000	0.211576	1.000000	0.899620	1.000000	0.982064
ORTHOMCL3021	n	n	-632.424377	-631.763177	-632.503061	-631.765237	1.322400	1.475648	0.516230	0.478150	1.000000	0.982064
ORTHOMCL1817	n	n	-365.857540	-365.854526	-366.100142	-365.854521	0.006028	0.491242	0.996990	0.782220	1.000000	0.982064
ORTHOMCL3035	n	n	-755.746364	-755.696637	-755.747126	-755.696636	0.099454	0.100980	0.951490	0.950760	1.000000	0.982064
ORTHOMCL2271	n	n	-247.814324	-247.812303	-247.812303	-247.812303	0.004042	0.000000	0.997980	1.000000	1.000000	0.982064
ORTHOMCL2182	n	n	-331.096443	-331.096384	-331.098502	-331.098523	0.000118	-0.000042	0.999940	1.000000	1.000000	0.982064
ORTHOMCL2147	n	n	-314.942165	-314.942004	-314.920206	-314.920383	0.000322	-0.000354	0.999840	1.000000	1.000000	0.982064
ORTHOMCL2425	n	n	-1045.413097	-1045.417008	-1045.413097	-1045.413153	-0.007822	-0.000112	1.000000	1.000000	1.000000	0.982064
ORTHOMCL2850	n	n	-487.437442	-487.437441	-487.437605	-487.456815	0.000002	-0.038420	1.000000	1.000000	1.000000	0.982064
ORTHOMCL517	n	n	-1041.404972	-1041.405070	-1041.405033	-1041.405876	-0.000196	-0.001686	1.000000	1.000000	1.000000	0.982064
ORTHOMCL2415	n	n	-762.378671	-762.378668	-762.379109	-762.379112	0.000006	-0.000006	1.000000	1.000000	1.000000	0.982064
ORTHOMCL2056	n	n	-552.480309	-552.473669	-552.478254	-552.473670	0.013280	0.009168	0.993380	0.995430	1.000000	0.982064
ORTHOMCL2545	n	n	-693.986623	-693.185673	-694.139999	-693.201730	1.601900	1.876538	0.448900	0.391300	1.000000	0.982064
ORTHOMCL84	n	n	-3030.837793	-3030.837781	-3030.840069	-3030.841305	0.000024	-0.002472	0.999990	1.000000	1.000000	0.982064
ORTHOMCL1647	n	n	-449.966968	-449.208795	-449.967156	-449.236244	1.516346	1.461824	0.468520	0.481470	1.000000	0.982064
ORTHOMCL2008	n	n	-864.489089	-864.489089	-864.492180	-864.489104	0.000000	0.006152	1.000000	0.996930	1.000000	0.982064
ORTHOMCL2112	n	n	-584.605010	-584.603110	-584.619198	-584.619382	0.003800	-0.000368	0.998100	1.000000	1.000000	0.982064
ORTHOMCL1943	n	n	-289.983006	-289.981961	-289.983368	-289.981966	0.002090	0.002804	0.998960	0.998600	1.000000	0.982064
ORTHOMCL2299	n	n	-835.501165	-835.501377	-835.501390	-835.501393	-0.000424	-0.000006	1.000000	1.000000	1.000000	0.982064
ORTHOMCL2657	n	n	-616.326396	-616.326437	-616.326413	-616.326419	-0.000082	-0.000012	1.000000	1.000000	1.000000	0.982064
ORTHOMCL2045	n	n	-203.015530	-203.015529	-203.015739	-203.069967	0.000002	-0.108456	1.000000	1.000000	1.000000	0.982064
ORTHOMCL1922	n	n	-678.806696	-678.768185	-678.840317	-678.769717	0.077022	0.141200	0.962220	0.931830	1.000000	0.982064
ORTHOMCL2348	n	n	-568.108663	-568.108583	-568.108574	-568.109213	0.000160	-0.001278	0.999920	1.000000	1.000000	0.982064
ORTHOMCL2834	n	n	-2329.713922	-2329.713922	-2329.152963	-2329.153026	0.000000	-0.000126	1.000000	1.000000	1.000000	0.982064
ORTHOMCL2066	n	n	-1384.900011	-1384.899863	-1384.899712	-1384.903107	0.000296	-0.006790	0.999850	1.000000	1.000000	0.982064
ORTHOMCL2395	n	n	-885.564592	-885.564744	-885.568674	-885.568695	-0.000304	-0.000042	1.000000	1.000000	1.000000	0.982064
ORTHOMCL2483	n	n	-929.037993	-929.035755	-929.037580	-929.037936	0.004476	-0.000712	0.997760	1.000000	1.000000	0.982064
ORTHOMCL3047	n	n	-485.627499	-485.627480	-485.631102	-485.631121	0.000038	-0.000038	0.999980	1.000000	1.000000	0.982064
ORTHOMCL1959	n	n	-2058.868002	-2057.886284	-2059.196853	-2057.889455	1.963436	2.614796	0.374670	0.270520	1.000000	0.982064
ORTHOMCL2074	n	n	-330.287654	-330.246844	-330.352232	-330.246948	0.081620	0.210568	0.960010	0.900070	1.000000	0.982064
ORTHOMCL1718	n	n	-1193.597849	-1193.397773	-1193.609410	-1193.397700	0.400152	0.423420	0.818670	0.809200	1.000000	0.982064
ORTHOMCL2416	n	n	-806.717611	-806.585258	-806.717610	-806.585258	0.264706	0.264704	0.876030	0.876030	1.000000	0.982064
ORTHOMCL1932	n	n	-328.424784	-328.427577	-328.424789	-328.424784	-0.005586	0.000010	1.000000	1.000000	1.000000	0.982064
ORTHOMCL3016	n	n	-779.191241	-779.191240	-779.191578	-779.192934	0.000002	-0.002712	1.000000	1.000000	1.000000	0.982064
ORTHOMCL2673	n	n	-314.696611	-314.696624	-314.695579	-314.695580	-0.000026	-0.000002	1.000000	1.000000	1.000000	0.982064
ORTHOMCL2367	n	n	-489.557454	-489.740619	-489.557724	-489.554621	-0.366330	0.006206	1.000000	0.996900	1.000000	0.982064
ORTHOMCL2930	n	n	-711.472678	-711.472678	-711.472984	-711.472985	0.000000	-0.000002	1.000000	1.000000	1.000000	0.982064
ORTHOMCL3024	n	n	-1042.314933	-1041.763119	-1042.314933	-1041.763119	1.103628	1.103628	0.575900	0.575900	1.000000	0.982064
ORTHOMCL2791	n	n	-1308.405099	-1307.647304	-1310.797598	-1308.107857	1.515590	5.379482	0.468700	0.067899	1.000000	0.887022
ORTHOMCL2210	n	n	-360.243207	-360.244403	-360.243915	-360.243207	-0.002392	0.001416	1.000000	0.999290	1.000000	0.982064
ORTHOMCL2643	n	n	-500.461416	-498.827699	-500.461417	-498.827700	3.267434	3.267434	0.195200	0.195200	1.000000	0.982064
ORTHOMCL2695	n	n	-558.396152	-558.045674	-558.396152	-557.922919	0.700956	0.946466	0.704350	0.622980	1.000000	0.982064
ORTHOMCL2238	n	n	-1864.312106	-1864.312030	-1864.312023	-1864.312099	0.000152	-0.000152	0.999920	1.000000	1.000000	0.982064
ORTHOMCL2048	n	n	-788.617991	-788.617968	-788.620281	-788.618155	0.000046	0.004252	0.999980	0.997880	1.000000	0.982064
ORTHOMCL2155	n	n	-690.055567	-690.055545	-690.055643	-690.055665	0.000044	-0.000044	0.999980	1.000000	1.000000	0.982064
ORTHOMCL2712	n	n	-306.050759	-306.050710	-306.050710	-306.051207	0.000098	-0.000994	0.999950	1.000000	1.000000	0.982064
ORTHOMCL2410	n	n	-412.377208	-412.377208	-410.206200	-410.206418	0.000000	-0.000436	1.000000	1.000000	1.000000	0.982064
ORTHOMCL2092	n	n	-655.806030	-655.806030	-653.831646	-653.831733	0.000000	-0.000174	1.000000	1.000000	1.000000	0.982064
ORTHOMCL2441	n	n	-648.663011	-648.302515	-648.663092	-648.302515	0.720992	0.721154	0.697330	0.697270	1.000000	0.982064
ORTHOMCL2662	n	n	-928.208652	-928.208622	-928.208620	-928.208747	0.000060	-0.000254	0.999970	1.000000	1.000000	0.982064
ORTHOMCL1700	n	n	-565.939455	-565.939456	-565.892027	-565.939451	-0.000002	-0.094848	1.000000	1.000000	1.000000	0.982064
ORTHOMCL1863	n	n	-456.639723	-456.639816	-456.320706	-456.320836	-0.000186	-0.000260	1.000000	1.000000	1.000000	0.982064
ORTHOMCL2125	n	n	-485.626475	-485.626475	-485.779231	-485.408117	0.000000	0.742228	1.000000	0.689970	1.000000	0.982064
ORTHOMCL2660	n	n	-1082.998830	-1082.996815	-1082.997727	-1082.996816	0.004030	0.001822	0.997990	0.999090	1.000000	0.982064
ORTHOMCL1979	n	n	-437.634775	-437.350206	-437.696963	-437.350845	0.569138	0.692236	0.752340	0.707430	1.000000	0.982064
ORTHOMCL2606	n	n	-615.060779	-615.060779	-615.060807	-615.060807	0.000000	0.000000	1.000000	1.000000	1.000000	0.982064
ORTHOMCL1858	n	n	-971.448498	-971.005384	-971.752895	-971.011786	0.886228	1.482218	0.642030	0.476590	1.000000	0.982064
ORTHOMCL1714	n	n	-660.976261	-660.982443	-660.976165	-660.976165	-0.012364	0.000000	1.000000	1.000000	1.000000	0.982064
ORTHOMCL2867	n	n	-575.214723	-574.858624	-575.389782	-574.858045	0.712198	1.063474	0.700400	0.587580	1.000000	0.982064
ORTHOMCL2138	n	n	-1037.641678	-1035.832945	-1038.804262	-1036.166752	3.617466	5.275020	0.163860	0.071539	1.000000	0.887022
ORTHOMCL2704	n	n	-567.359451	-567.134264	-567.739594	-567.134670	0.450374	1.209848	0.798370	0.546120	1.000000	0.982064
ORTHOMCL2802	n	n	-354.552549	-354.552541	-354.553334	-354.553342	0.000016	-0.000016	0.999990	1.000000	1.000000	0.982064
ORTHOMCL2053	n	n	-1067.635259	-1067.353555	-1067.247148	-1065.637299	0.563408	3.219698	0.754500	0.199920	1.000000	0.982064
ORTHOMCL1585	n	n	-404.248312	-404.248200	-404.257715	-404.257827	0.000224	-0.000224	0.999890	1.000000	1.000000	0.982064
ORTHOMCL2796	n	n	-1052.817576	-1052.817551	-1052.817549	-1052.817574	0.000050	-0.000050	0.999980	1.000000	1.000000	0.982064
ORTHOMCL2768	n	n	-1014.777029	-1014.773866	-1015.069370	-1014.785297	0.006326	0.568146	0.996840	0.752710	1.000000	0.982064
ORTHOMCL1816	n	n	-623.021142	-623.021142	-622.784638	-622.784608	0.000000	0.000060	1.000000	0.999970	1.000000	0.982064
ORTHOMCL2196	n	n	-409.160047	-408.127437	-409.171480	-408.129825	2.065220	2.083310	0.356080	0.352870	1.000000	0.982064
ORTHOMCL36	n	n	-1719.573661	-1719.573648	-1719.575410	-1719.575423	0.000026	-0.000026	0.999990	1.000000	1.000000	0.982064
ORTHOMCL1927	n	n	-267.431526	-267.431475	-267.431469	-267.431601	0.000102	-0.000264	0.999950	1.000000	1.000000	0.982064
ORTHOMCL160	n	n	-755.462290	-755.462290	-753.988747	-753.988812	0.000000	-0.000130	1.000000	1.000000	1.000000	0.982064
ORTHOMCL64	n	n	-1891.024888	-1891.025119	-1891.024996	-1891.045155	-0.000462	-0.040318	1.000000	1.000000	1.000000	0.982064
ORTHOMCL2754	n	n	-289.673384	-289.673072	-289.673072	-289.673073	0.000624	-0.000002	0.999690	1.000000	1.000000	0.982064
ORTHOMCL2359	n	n	-1119.039203	-1119.039595	-1119.039272	-1119.036035	-0.000784	0.006474	1.000000	0.996770	1.000000	0.982064
ORTHOMCL2729	n	n	-1368.809555	-1368.790751	-1368.926616	-1368.779196	0.037608	0.294840	0.981370	0.862930	1.000000	0.982064
ORTHOMCL2512	n	n	-264.728448	-264.644913	-264.728447	-264.644913	0.167070	0.167068	0.919860	0.919860	1.000000	0.982064
ORTHOMCL1778	n	n	-1122.710868	-1122.513165	-1123.003769	-1122.552625	0.395406	0.902288	0.820610	0.636900	1.000000	0.982064
ORTHOMCL1775	n	n	-1504.744512	-1503.845025	-1504.795147	-1503.905874	1.798974	1.778546	0.406780	0.410950	1.000000	0.982064
ORTHOMCL2303	n	n	-977.246637	-977.246637	-977.221091	-977.221091	0.000000	0.000000	1.000000	1.000000	1.000000	0.982064
ORTHOMCL2675	n	n	-758.538280	-757.638710	-758.716868	-757.744564	1.799140	1.944608	0.406740	0.378210	1.000000	0.982064
ORTHOMCL1889	n	n	-861.693044	-861.693044	-861.693118	-861.698691	0.000000	-0.011146	1.000000	1.000000	1.000000	0.982064
ORTHOMCL1812	n	n	-283.962832	-283.959362	-283.959362	-283.959362	0.006940	0.000000	0.996540	1.000000	1.000000	0.982064
ORTHOMCL2298	n	n	-891.196440	-891.196440	-891.208119	-891.196584	0.000000	0.023070	1.000000	0.988530	1.000000	0.982064
ORTHOMCL2394	n	n	-741.605888	-741.605842	-741.611801	-741.611847	0.000092	-0.000092	0.999950	1.000000	1.000000	0.982064
ORTHOMCL2870	n	n	-308.513976	-308.513957	-308.513956	-308.513974	0.000038	-0.000036	0.999980	1.000000	1.000000	0.982064
ORTHOMCL2145	n	n	-926.457144	-926.457143	-926.477288	-926.470406	0.000002	0.013764	1.000000	0.993140	1.000000	0.982064
ORTHOMCL2429	n	n	-455.851737	-455.810821	-455.959667	-455.814507	0.081832	0.290320	0.959910	0.864880	1.000000	0.982064
ORTHOMCL1	n	n	-282.777924	-282.777581	-282.777525	-282.777873	0.000686	-0.000696	0.999660	1.000000	1.000000	0.982064
ORTHOMCL2793	n	u	-2850.452541	-2850.062022	-2853.212216	-2850.139798	0.781038	6.144836	0.676710	0.046309	1.000000	0.678386
ORTHOMCL1691	n	n	-541.579028	-541.399372	-541.582418	-541.399418	0.359312	0.366000	0.835560	0.832770	1.000000	0.982064
ORTHOMCL1885	n	n	-814.906247	-814.906266	-814.897751	-814.897765	-0.000038	-0.000028	1.000000	1.000000	1.000000	0.982064
ORTHOMCL2952	n	n	-751.544458	-751.544458	-751.538049	-751.538051	0.000000	-0.000004	1.000000	1.000000	1.000000	0.982064
ORTHOMCL2430	n	n	-1051.532202	-1051.522762	-1051.534950	-1051.522923	0.018880	0.024054	0.990600	0.988050	1.000000	0.982064
ORTHOMCL1913	n	n	-1043.321745	-1042.178029	-1043.321745	-1042.177828	2.287432	2.287834	0.318630	0.318570	1.000000	0.982064
ORTHOMCL1749	n	n	-545.680182	-545.587656	-545.680210	-545.586693	0.185052	0.187034	0.911630	0.910720	1.000000	0.982064
ORTHOMCL1855	n	n	-516.564287	-516.564287	-516.907763	-516.542694	0.000000	0.730138	1.000000	0.694150	1.000000	0.982064
ORTHOMCL2456	n	n	-1079.475477	-1079.475345	-1079.475345	-1079.475346	0.000264	-0.000002	0.999870	1.000000	1.000000	0.982064
ORTHOMCL1655	n	n	-2068.340137	-2068.339606	-2068.389658	-2068.346461	0.001062	0.086394	0.999470	0.957720	1.000000	0.982064
ORTHOMCL2862	n	n	-415.074603	-415.074336	-415.074597	-415.074622	0.000534	-0.000050	0.999730	1.000000	1.000000	0.982064
ORTHOMCL2756	n	n	-368.024460	-368.023887	-368.024312	-368.024453	0.001146	-0.000282	0.999430	1.000000	1.000000	0.982064
ORTHOMCL1950	n	n	-560.821561	-560.163870	-560.827909	-560.170309	1.315382	1.315200	0.518050	0.518090	1.000000	0.982064
ORTHOMCL2267	n	n	-639.143308	-639.143308	-639.145845	-639.145772	0.000000	0.000146	1.000000	0.999930	1.000000	0.982064
ORTHOMCL1716	n	n	-915.207957	-915.207957	-913.820887	-913.820973	0.000000	-0.000172	1.000000	1.000000	1.000000	0.982064
ORTHOMCL2426	n	n	-436.044978	-436.017826	-436.149489	-436.018707	0.054304	0.261564	0.973210	0.877410	1.000000	0.982064
ORTHOMCL2366	n	n	-471.965621	-471.965586	-471.967391	-471.967425	0.000070	-0.000068	0.999970	1.000000	1.000000	0.982064
ORTHOMCL2215	n	n	-862.775685	-862.466451	-863.142629	-862.480041	0.618468	1.325176	0.734010	0.515520	1.000000	0.982064
ORTHOMCL2279	n	n	-1673.751172	-1673.639668	-1673.936485	-1673.639668	0.223008	0.593634	0.894490	0.743180	1.000000	0.982064
ORTHOMCL2302	n	n	-469.147683	-469.148090	-469.146942	-469.146842	-0.000814	0.000200	1.000000	0.999900	1.000000	0.982064
ORTHOMCL2015	n	n	-1386.830614	-1386.881608	-1386.830916	-1386.674069	-0.101988	0.313694	1.000000	0.854830	1.000000	0.982064
ORTHOMCL2477	n	n	-1743.311662	-1742.185482	-1743.327092	-1742.185482	2.252360	2.283220	0.324270	0.319300	1.000000	0.982064
ORTHOMCL2187	n	n	-487.222598	-487.222583	-487.222582	-487.222597	0.000030	-0.000030	0.999990	1.000000	1.000000	0.982064
ORTHOMCL2263	n	n	-269.691997	-269.690511	-269.690500	-269.690500	0.002972	0.000000	0.998520	1.000000	1.000000	0.982064
ORTHOMCL1811	n	n	-986.352124	-985.642678	-986.923433	-985.642678	1.418892	2.561510	0.491920	0.277830	1.000000	0.982064
ORTHOMCL1675	n	n	-674.800151	-674.800069	-674.806515	-674.807790	0.000164	-0.002550	0.999920	1.000000	1.000000	0.982064
ORTHOMCL1951	n	n	-953.803264	-953.803264	-953.736805	-953.736797	0.000000	0.000016	1.000000	0.999990	1.000000	0.982064
ORTHOMCL1783	n	n	-1229.064061	-1229.064049	-1229.065069	-1229.065080	0.000024	-0.000022	0.999990	1.000000	1.000000	0.982064
ORTHOMCL1663	n	n	-517.677977	-517.677204	-517.677099	-517.677889	0.001546	-0.001580	0.999230	1.000000	1.000000	0.982064
ORTHOMCL2525	n	n	-1078.492191	-1077.517472	-1078.550441	-1077.518147	1.949438	2.064588	0.377300	0.356190	1.000000	0.982064
ORTHOMCL1966	n	n	-444.874330	-444.513370	-444.874329	-444.533231	0.721920	0.682196	0.697010	0.710990	1.000000	0.982064
ORTHOMCL2261	n	n	-535.141359	-535.140755	-535.140755	-535.142095	0.001208	-0.002680	0.999400	1.000000	1.000000	0.982064
ORTHOMCL1790	n	n	-651.425298	-651.425364	-651.425298	-651.428653	-0.000132	-0.006710	1.000000	1.000000	1.000000	0.982064
ORTHOMCL2099	n	n	-482.771971	-482.771942	-482.774961	-482.774907	0.000058	0.000108	0.999970	0.999950	1.000000	0.982064
ORTHOMCL2381	n	n	-646.847783	-646.479960	-646.847634	-646.098372	0.735646	1.498524	0.692240	0.472720	1.000000	0.982064
ORTHOMCL1884	n	n	-306.504013	-306.273109	-306.573156	-306.273123	0.461808	0.600066	0.793820	0.740790	1.000000	0.982064
ORTHOMCL2198	n	n	-208.166895	-207.511086	-208.166887	-207.511089	1.311618	1.311596	0.519020	0.519030	1.000000	0.982064
ORTHOMCL2249	n	n	-664.024066	-664.024066	-664.025406	-664.025581	0.000000	-0.000350	1.000000	1.000000	1.000000	0.982064
ORTHOMCL2490	n	n	-373.378361	-373.378358	-373.378358	-372.974179	0.000006	0.808358	1.000000	0.667520	1.000000	0.982064
ORTHOMCL2910	n	n	-506.945943	-506.945939	-506.962374	-506.946979	0.000008	0.030790	1.000000	0.984720	1.000000	0.982064
ORTHOMCL2376	n	n	-494.726871	-494.726342	-494.726686	-494.724986	0.001058	0.003400	0.999470	0.998300	1.000000	0.982064
ORTHOMCL2009	n	n	-400.017312	-400.017374	-400.017695	-400.017721	-0.000124	-0.000052	1.000000	1.000000	1.000000	0.982064
ORTHOMCL2539	n	n	-378.891367	-378.890946	-378.891369	-378.890947	0.000842	0.000844	0.999580	0.999580	1.000000	0.982064
ORTHOMCL2454	n	n	-530.185365	-529.309249	-530.185365	-529.309249	1.752232	1.752232	0.416400	0.416400	1.000000	0.982064
ORTHOMCL2664	n	n	-1889.805238	-1889.805238	-1889.818230	-1889.819385	0.000000	-0.002310	1.000000	1.000000	1.000000	0.982064
ORTHOMCL2287	n	n	-369.599824	-369.599824	-369.133582	-369.133779	0.000000	-0.000394	1.000000	1.000000	1.000000	0.982064
ORTHOMCL2559	n	n	-553.970113	-553.970113	-553.970113	-553.971113	0.000000	-0.002000	1.000000	1.000000	1.000000	0.982064
ORTHOMCL2006	n	u	-1589.805210	-1589.804729	-1594.934355	-1589.952794	0.000962	9.963122	0.999520	0.006863	1.000000	0.172357
ORTHOMCL2527	n	n	-930.331855	-930.331855	-930.333913	-930.331855	0.000000	0.004116	1.000000	0.997940	1.000000	0.982064
ORTHOMCL3043	n	n	-260.723788	-259.719643	-260.724194	-259.719574	2.008290	2.009240	0.366360	0.366180	1.000000	0.982064
ORTHOMCL2414	n	n	-980.979743	-980.979083	-980.979083	-980.979083	0.001320	0.000000	0.999340	1.000000	1.000000	0.982064
ORTHOMCL2708	n	n	-540.607685	-540.607757	-540.607851	-540.607855	-0.000144	-0.000008	1.000000	1.000000	1.000000	0.982064
ORTHOMCL2497	n	n	-384.327228	-384.327190	-384.328586	-384.329340	0.000076	-0.001508	0.999960	1.000000	1.000000	0.982064
ORTHOMCL2666	n	n	-486.106258	-486.106205	-486.119142	-486.119195	0.000106	-0.000106	0.999950	1.000000	1.000000	0.982064
ORTHOMCL2268	n	n	-539.095737	-539.095658	-539.097107	-539.095761	0.000158	0.002692	0.999920	0.998650	1.000000	0.982064
ORTHOMCL1762	n	n	-283.090647	-282.396808	-283.138876	-282.396740	1.387678	1.484272	0.499650	0.476100	1.000000	0.982064
ORTHOMCL2481	n	n	-351.828860	-351.828849	-351.829559	-351.829569	0.000022	-0.000020	0.999990	1.000000	1.000000	0.982064
ORTHOMCL1955	n	n	-361.737531	-361.732947	-361.732947	-361.732947	0.009168	0.000000	0.995430	1.000000	1.000000	0.982064
ORTHOMCL1939	n	n	-653.913859	-651.640907	-654.003977	-651.640977	4.545904	4.726000	0.103010	0.094137	1.000000	0.982064
ORTHOMCL165	n	n	-1783.286153	-1783.286119	-1783.345191	-1783.287546	0.000068	0.115290	0.999970	0.943990	1.000000	0.982064
ORTHOMCL1923	n	n	-326.759381	-326.755325	-326.755302	-326.758958	0.008112	-0.007312	0.995950	1.000000	1.000000	0.982064
ORTHOMCL2418	n	n	-2463.639732	-2463.639735	-2463.639795	-2463.641546	-0.000006	-0.003502	1.000000	1.000000	1.000000	0.982064
ORTHOMCL1709	n	n	-1027.663268	-1027.580813	-1027.689480	-1027.496422	0.164910	0.386116	0.920850	0.824430	1.000000	0.982064
ORTHOMCL2642	n	n	-1056.663254	-1056.662232	-1056.662851	-1056.663415	0.002044	-0.001128	0.998980	1.000000	1.000000	0.982064
ORTHOMCL2544	n	n	-1765.952623	-1765.952623	-1765.206723	-1764.768047	0.000000	0.877352	1.000000	0.644890	1.000000	0.982064
ORTHOMCL2651	n	n	-1083.171854	-1083.021244	-1083.171851	-1083.020569	0.301220	0.302564	0.860180	0.859610	1.000000	0.982064
ORTHOMCL3033	n	n	-351.359607	-351.020617	-351.359607	-351.020617	0.677980	0.677980	0.712490	0.712490	1.000000	0.982064
ORTHOMCL2088	n	n	-325.166035	-325.166034	-325.167335	-325.166444	0.000002	0.001782	1.000000	0.999110	1.000000	0.982064
ORTHOMCL1766	n	n	-520.532685	-520.530915	-520.532088	-520.530872	0.003540	0.002432	0.998230	0.998780	1.000000	0.982064
ORTHOMCL1971	n	n	-1114.063388	-1114.063359	-1114.067309	-1114.067337	0.000058	-0.000056	0.999970	1.000000	1.000000	0.982064
ORTHOMCL2306	n	n	-391.156874	-391.155509	-391.155509	-391.156042	0.002730	-0.001066	0.998640	1.000000	1.000000	0.982064
ORTHOMCL2349	n	n	-1477.188665	-1477.035023	-1477.188665	-1477.034530	0.307284	0.308270	0.857580	0.857160	1.000000	0.982064
ORTHOMCL2682	n	n	-340.165950	-340.164738	-340.164738	-340.164739	0.002424	-0.000002	0.998790	1.000000	1.000000	0.982064
ORTHOMCL2520	n	n	-255.820898	-255.820124	-255.820124	-255.820124	0.001548	0.000000	0.999230	1.000000	1.000000	0.982064
ORTHOMCL2023	n	n	-1629.087010	-1629.086008	-1629.076532	-1629.076997	0.002004	-0.000930	0.999000	1.000000	1.000000	0.982064
ORTHOMCL1952	n	n	-529.739682	-529.739770	-529.739770	-529.739768	-0.000176	0.000004	1.000000	1.000000	1.000000	0.982064
ORTHOMCL2480	n	n	-859.365443	-859.317367	-859.379400	-859.379407	0.096152	-0.000014	0.953060	1.000000	1.000000	0.982064
ORTHOMCL2552	n	n	-432.765369	-431.585310	-432.866275	-432.147197	2.360118	1.438156	0.307260	0.487200	1.000000	0.982064
ORTHOMCL1815	n	n	-581.373433	-581.373433	-581.051847	-581.051777	0.000000	0.000140	1.000000	0.999930	1.000000	0.982064
ORTHOMCL1791	n	n	-558.529800	-558.498502	-558.543231	-558.499042	0.062596	0.088378	0.969190	0.956770	1.000000	0.982064
ORTHOMCL15	n	n	-1308.612999	-1308.609592	-1308.774063	-1308.610613	0.006814	0.326900	0.996600	0.849210	1.000000	0.982064
ORTHOMCL1769	n	n	-487.495636	-487.495616	-487.495614	-487.495634	0.000040	-0.000040	0.999980	1.000000	1.000000	0.982064
ORTHOMCL2694	n	n	-556.035037	-553.826904	-556.035037	-553.826906	4.416266	4.416262	0.109910	0.109910	1.000000	0.982064
ORTHOMCL2635	n	n	-1004.818360	-1003.698445	-1005.344306	-1003.667662	2.239830	3.353288	0.326310	0.187000	1.000000	0.982064
ORTHOMCL2368	n	n	-2917.900016	-2917.899868	-2917.899991	-2917.899992	0.000296	-0.000002	0.999850	1.000000	1.000000	0.982064
ORTHOMCL2485	n	n	-468.710822	-466.542342	-468.733142	-466.544502	4.336960	4.377280	0.114350	0.112070	1.000000	0.982064
ORTHOMCL2571	n	n	-412.432733	-411.823195	-412.544118	-411.823344	1.219076	1.441548	0.543600	0.486380	1.000000	0.982064
ORTHOMCL1788	n	n	-478.851821	-478.851847	-478.851888	-478.851885	-0.000052	0.000006	1.000000	1.000000	1.000000	0.982064
ORTHOMCL2057	n	n	-499.734156	-499.734156	-499.734204	-499.734204	0.000000	0.000000	1.000000	1.000000	1.000000	0.982064
ORTHOMCL1905	n	n	-549.166685	-549.155697	-549.381837	-549.156995	0.021976	0.449684	0.989070	0.798640	1.000000	0.982064
ORTHOMCL2677	n	n	-1575.438885	-1575.442107	-1575.438884	-1575.438885	-0.006444	-0.000002	1.000000	1.000000	1.000000	0.982064
ORTHOMCL2233	n	n	-462.244732	-462.244731	-462.244733	-462.244732	0.000002	0.000002	1.000000	1.000000	1.000000	0.982064
ORTHOMCL1882	n	n	-440.284656	-440.269474	-440.609396	-440.269472	0.030364	0.679848	0.984930	0.711820	1.000000	0.982064
ORTHOMCL2618	n	n	-1784.390107	-1784.390085	-1784.390083	-1784.390105	0.000044	-0.000044	0.999980	1.000000	1.000000	0.982064
ORTHOMCL1479	n	n	-766.144034	-766.144781	-766.141578	-766.144614	-0.001494	-0.006072	1.000000	1.000000	1.000000	0.982064
ORTHOMCL1930	n	n	-927.736892	-927.003969	-927.855903	-927.008241	1.465846	1.695324	0.480500	0.428420	1.000000	0.982064
ORTHOMCL2522	n	n	-743.885179	-743.885168	-743.888299	-743.888310	0.000022	-0.000022	0.999990	1.000000	1.000000	0.982064
ORTHOMCL2122	n	n	-1204.507857	-1203.801729	-1206.192458	-1203.804140	1.412256	4.776636	0.493550	0.091784	1.000000	0.982064
ORTHOMCL2702	n	n	-660.182897	-660.183146	-660.183185	-660.182251	-0.000498	0.001868	1.000000	0.999070	1.000000	0.982064
ORTHOMCL2439	n	n	-1337.912390	-1337.072272	-1337.083154	-1337.083280	1.680236	-0.000252	0.431660	1.000000	1.000000	0.982064
ORTHOMCL2800	n	n	-336.933924	-336.933575	-336.933575	-336.933673	0.000698	-0.000196	0.999650	1.000000	1.000000	0.982064
ORTHOMCL2209	n	n	-248.417532	-248.417086	-248.417091	-248.417002	0.000892	0.000178	0.999550	0.999910	1.000000	0.982064
ORTHOMCL2386	n	n	-1512.071781	-1511.972206	-1512.071781	-1511.947946	0.199150	0.247670	0.905220	0.883530	1.000000	0.982064
ORTHOMCL2728	n	n	-2200.074715	-2200.074357	-2200.101723	-2200.104654	0.000716	-0.005862	0.999640	1.000000	1.000000	0.982064
ORTHOMCL2216	n	n	-355.982518	-355.632696	-355.982518	-355.611727	0.699644	0.741582	0.704810	0.690190	1.000000	0.982064
ORTHOMCL2508	n	n	-1249.330735	-1249.330734	-1249.330734	-1249.333486	0.000002	-0.005504	1.000000	1.000000	1.000000	0.982064
ORTHOMCL2766	n	n	-620.449295	-620.449203	-620.468758	-620.468849	0.000184	-0.000182	0.999910	1.000000	1.000000	0.982064
ORTHOMCL2423	n	n	-408.314928	-408.314928	-407.779976	-407.780135	0.000000	-0.000318	1.000000	1.000000	1.000000	0.982064
ORTHOMCL2212	n	n	-995.044217	-995.044217	-994.130463	-994.130635	0.000000	-0.000344	1.000000	1.000000	1.000000	0.982064
ORTHOMCL2749	n	n	-370.085340	-369.090708	-370.089960	-369.091097	1.989264	1.997726	0.369860	0.368300	1.000000	0.982064
ORTHOMCL2269	n	n	-949.637939	-949.634278	-949.634278	-949.634279	0.007322	-0.000002	0.996350	1.000000	1.000000	0.982064
ORTHOMCL2189	n	n	-304.841764	-303.001951	-304.846844	-303.001948	3.679626	3.689792	0.158850	0.158040	1.000000	0.982064
ORTHOMCL2401	n	n	-1599.840168	-1599.814588	-1599.840888	-1599.814586	0.051160	0.052604	0.974740	0.974040	1.000000	0.982064
ORTHOMCL2397	n	n	-1008.723353	-1008.723353	-1008.681146	-1008.680868	0.000000	0.000556	1.000000	0.999720	1.000000	0.982064
ORTHOMCL2118	n	n	-461.535668	-461.535668	-462.150147	-461.581892	0.000000	1.136510	1.000000	0.566510	1.000000	0.982064
ORTHOMCL2555	n	n	-3285.563454	-3285.255971	-3285.684746	-3285.265613	0.614966	0.838266	0.735300	0.657620	1.000000	0.982064
ORTHOMCL2067	n	n	-244.937360	-242.233580	-244.938944	-242.233580	5.407560	5.410728	0.066952	0.066846	1.000000	0.887022
ORTHOMCL2853	n	n	-310.998517	-310.998332	-311.005405	-311.005588	0.000370	-0.000366	0.999820	1.000000	1.000000	0.982064
ORTHOMCL1929	n	n	-525.762455	-525.762437	-525.628969	-525.628976	0.000036	-0.000014	0.999980	1.000000	1.000000	0.982064
ORTHOMCL1711	n	n	-357.317083	-357.208820	-357.317084	-357.208820	0.216526	0.216528	0.897390	0.897390	1.000000	0.982064
ORTHOMCL1849	n	n	-716.233879	-713.921855	-716.235526	-714.292741	4.624048	3.885570	0.099061	0.143300	1.000000	0.982064
ORTHOMCL2872	n	n	-1751.922955	-1750.489443	-1752.118458	-1750.498523	2.867024	3.239870	0.238470	0.197910	1.000000	0.982064
ORTHOMCL2272	n	n	-1505.927331	-1505.927330	-1505.927362	-1505.934560	0.000002	-0.014396	1.000000	1.000000	1.000000	0.982064
ORTHOMCL2170	n	n	-563.891943	-563.891943	-563.793932	-563.793956	0.000000	-0.000048	1.000000	1.000000	1.000000	0.982064
ORTHOMCL1891	n	n	-755.081811	-755.081701	-754.940937	-754.941175	0.000220	-0.000476	0.999890	1.000000	1.000000	0.982064
ORTHOMCL2715	n	n	-354.673309	-354.673288	-354.673286	-354.673307	0.000042	-0.000042	0.999980	1.000000	1.000000	0.982064
ORTHOMCL1784	n	n	-3115.397883	-3115.114351	-3115.477185	-3115.115472	0.567064	0.723426	0.753120	0.696480	1.000000	0.982064
ORTHOMCL2228	n	u	-2208.317389	-2205.649635	-2209.543192	-2205.733127	5.335508	7.620130	0.069408	0.022147	1.000000	0.409812
ORTHOMCL2072	n	n	-594.350270	-594.350252	-594.352493	-594.352510	0.000036	-0.000034	0.999980	1.000000	1.000000	0.982064
ORTHOMCL2818	n	n	-610.274725	-610.274672	-610.281073	-610.281125	0.000106	-0.000104	0.999950	1.000000	1.000000	0.982064
ORTHOMCL1798	n	n	-1615.027426	-1614.670410	-1615.015036	-1614.670410	0.714032	0.689252	0.699760	0.708490	1.000000	0.982064
ORTHOMCL1974	n	n	-968.576186	-968.271155	-968.611665	-968.274583	0.610062	0.674164	0.737100	0.713850	1.000000	0.982064
ORTHOMCL2159	n	n	-1137.122613	-1137.122609	-1137.123473	-1137.125910	0.000008	-0.004874	1.000000	1.000000	1.000000	0.982064
ORTHOMCL1847	n	n	-322.679324	-322.679480	-322.679331	-322.679724	-0.000312	-0.000786	1.000000	1.000000	1.000000	0.982064
ORTHOMCL1821	n	n	-1144.836953	-1144.301666	-1144.836948	-1144.301666	1.070574	1.070564	0.585500	0.585500	1.000000	0.982064
ORTHOMCL2913	n	n	-275.251577	-275.251577	-275.251768	-275.251769	0.000000	-0.000002	1.000000	1.000000	1.000000	0.982064
ORTHOMCL2553	n	n	-241.539706	-241.539424	-241.539652	-241.539738	0.000564	-0.000172	0.999720	1.000000	1.000000	0.982064
ORTHOMCL2569	n	n	-852.796477	-852.796475	-852.796819	-852.796821	0.000004	-0.000004	1.000000	1.000000	1.000000	0.982064
ORTHOMCL2519	n	n	-620.335639	-618.249771	-620.335780	-618.280695	4.171736	4.110170	0.124200	0.128080	1.000000	0.982064
ORTHOMCL1789	n	n	-1132.375240	-1132.279025	-1132.410152	-1132.278583	0.192430	0.263138	0.908270	0.876720	1.000000	0.982064
ORTHOMCL1724	n	n	-1219.071942	-1219.071942	-1218.976845	-1218.976640	0.000000	0.000410	1.000000	0.999800	1.000000	0.982064
ORTHOMCL2577	n	n	-510.460004	-509.615779	-510.546546	-509.617918	1.688450	1.857256	0.429890	0.395100	1.000000	0.982064
ORTHOMCL1728	n	n	-686.965260	-685.150226	-686.968749	-685.152710	3.630068	3.632078	0.162830	0.162670	1.000000	0.982064
ORTHOMCL1710	n	n	-937.047528	-936.730496	-937.047528	-936.387669	0.634064	1.319718	0.728310	0.516920	1.000000	0.982064
ORTHOMCL2264	n	n	-230.598282	-230.598423	-230.597023	-230.597695	-0.000282	-0.001344	1.000000	1.000000	1.000000	0.982064
ORTHOMCL2509	n	n	-591.665541	-591.665541	-591.665750	-591.665759	0.000000	-0.000018	1.000000	1.000000	1.000000	0.982064
ORTHOMCL2906	n	n	-291.369254	-291.369226	-291.369224	-291.370260	0.000056	-0.002072	0.999970	1.000000	1.000000	0.982064
ORTHOMCL2725	n	n	-391.636710	-391.636644	-391.636638	-391.636704	0.000132	-0.000132	0.999930	1.000000	1.000000	0.982064
ORTHOMCL2024	n	n	-479.127298	-479.127298	-478.587758	-478.587852	0.000000	-0.000188	1.000000	1.000000	1.000000	0.982064
ORTHOMCL1908	n	n	-1060.547980	-1060.426329	-1060.589892	-1060.427759	0.243302	0.324266	0.885460	0.850330	1.000000	0.982064
ORTHOMCL2669	n	n	-3544.615399	-3544.615399	-3540.783371	-3540.784208	0.000000	-0.001674	1.000000	1.000000	1.000000	0.982064
ORTHOMCL2445	n	n	-530.547446	-530.547446	-530.547529	-530.547530	0.000000	-0.000002	1.000000	1.000000	1.000000	0.982064
ORTHOMCL2721	n	n	-686.618063	-686.618063	-686.618111	-686.618251	0.000000	-0.000280	1.000000	1.000000	1.000000	0.982064
ORTHOMCL109	n	n	-1559.075567	-1558.457846	-1559.075565	-1558.457148	1.235442	1.236834	0.539170	0.538800	1.000000	0.982064
ORTHOMCL2608	n	n	-209.544413	-209.545349	-209.544413	-209.544413	-0.001872	0.000000	1.000000	1.000000	1.000000	0.982064
ORTHOMCL2123	n	n	-1097.031573	-1096.708109	-1097.031570	-1096.708109	0.646928	0.646922	0.723640	0.723640	1.000000	0.982064
ORTHOMCL2799	n	n	-947.525671	-947.523346	-947.523346	-947.525365	0.004650	-0.004038	0.997680	1.000000	1.000000	0.982064
ORTHOMCL2587	-	-	-	-	-	-	-	-	-	-	-	-
ORTHOMCL3045	-	-	-	-	-	-	-	-	-	-	-	-
ORTHOMCL2713	-	-	-	-	-	-	-	-	-	-	-	-
ORTHOMCL110	-	-	-	-	-	-	-	-	-	-	-	-
ORTHOMCL2389	-	-	-	-	-	-	-	-	-	-	-	-
ORTHOMCL108	-	-	-	-	-	-	-	-	-	-	-	-
ORTHOMCL2868	-	-	-	-	-	-	-	-	-	-	-	-
ORTHOMCL2338	-	-	-	-	-	-	-	-	-	-	-	-
ORTHOMCL2038	-	-	-	-	-	-	-	-	-	-	-	-
ORTHOMCL2136	-	-	-	-	-	-	-	-	-	-	-	-
ORTHOMCL2921	-	-	-	-	-	-	-	-	-	-	-	-
ORTHOMCL1705	-	-	-	-	-	-	-	-	-	-	-	-
ORTHOMCL1774	-	-	-	-	-	-	-	-	-	-	-	-
ORTHOMCL2531	-	-	-	-	-	-	-	-	-	-	-	-
ORTHOMCL2685	-	-	-	-	-	-	-	-	-	-	-	-
ORTHOMCL1699	-	-	-	-	-	-	-	-	-	-	-	-
ORTHOMCL2239	-	-	-	-	-	-	-	-	-	-	-	-
ORTHOMCL2620	-	-	-	-	-	-	-	-	-	-	-	-
ORTHOMCL2333	-	-	-	-	-	-	-	-	-	-	-	-
ORTHOMCL2195	-	-	-	-	-	-	-	-	-	-	-	-
ORTHOMCL1978	-	-	-	-	-	-	-	-	-	-	-	-
ORTHOMCL1946	-	-	-	-	-	-	-	-	-	-	-	-
ORTHOMCL2203	-	-	-	-	-	-	-	-	-	-	-	-
ORTHOMCL2746	-	-	-	-	-	-	-	-	-	-	-	-
ORTHOMCL2301	-	-	-	-	-	-	-	-	-	-	-	-
ORTHOMCL1712	-	-	-	-	-	-	-	-	-	-	-	-
ORTHOMCL2804	-	-	-	-	-	-	-	-	-	-	-	-
ORTHOMCL2547	-	-	-	-	-	-	-	-	-	-	-	-
ORTHOMCL1752	-	-	-	-	-	-	-	-	-	-	-	-
ORTHOMCL2117	-	-	-	-	-	-	-	-	-	-	-	-
ORTHOMCL2227	-	-	-	-	-	-	-	-	-	-	-	-
ORTHOMCL2627	-	-	-	-	-	-	-	-	-	-	-	-
ORTHOMCL2342	-	-	-	-	-	-	-	-	-	-	-	-
ORTHOMCL2458	-	-	-	-	-	-	-	-	-	-	-	-
ORTHOMCL1692	-	-	-	-	-	-	-	-	-	-	-	-
ORTHOMCL2213	-	-	-	-	-	-	-	-	-	-	-	-
ORTHOMCL2278	-	-	-	-	-	-	-	-	-	-	-	-
ORTHOMCL57	-	-	-	-	-	-	-	-	-	-	-	-
ORTHOMCL1964	-	-	-	-	-	-	-	-	-	-	-	-
ORTHOMCL3015	-	-	-	-	-	-	-	-	-	-	-	-
ORTHOMCL2363	-	-	-	-	-	-	-	-	-	-	-	-
ORTHOMCL1875	-	-	-	-	-	-	-	-	-	-	-	-
ORTHOMCL2583	-	-	-	-	-	-	-	-	-	-	-	-
ORTHOMCL2513	-	-	-	-	-	-	-	-	-	-	-	-
ORTHOMCL2311	-	-	-	-	-	-	-	-	-	-	-	-
ORTHOMCL2447	-	-	-	-	-	-	-	-	-	-	-	-
ORTHOMCL1771	-	-	-	-	-	-	-	-	-	-	-	-
ORTHOMCL1907	-	-	-	-	-	-	-	-	-	-	-	-
ORTHOMCL1819	-	-	-	-	-	-	-	-	-	-	-	-
ORTHOMCL2941	-	-	-	-	-	-	-	-	-	-	-	-
ORTHOMCL1823	-	-	-	-	-	-	-	-	-	-	-	-
ORTHOMCL1818	-	-	-	-	-	-	-	-	-	-	-	-
ORTHOMCL2130	-	-	-	-	-	-	-	-	-	-	-	-
ORTHOMCL1792	-	-	-	-	-	-	-	-	-	-	-	-
ORTHOMCL1767	-	-	-	-	-	-	-	-	-	-	-	-
ORTHOMCL2932	-	-	-	-	-	-	-	-	-	-	-	-
ORTHOMCL2340	-	-	-	-	-	-	-	-	-	-	-	-
ORTHOMCL91	-	-	-	-	-	-	-	-	-	-	-	-
ORTHOMCL2354	-	-	-	-	-	-	-	-	-	-	-	-
ORTHOMCL2825	-	-	-	-	-	-	-	-	-	-	-	-
ORTHOMCL1854	-	-	-	-	-	-	-	-	-	-	-	-
ORTHOMCL2985	-	-	-	-	-	-	-	-	-	-	-	-
ORTHOMCL2224	-	-	-	-	-	-	-	-	-	-	-	-
ORTHOMCL2047	-	-	-	-	-	-	-	-	-	-	-	-
ORTHOMCL1936	-	-	-	-	-	-	-	-	-	-	-	-
ORTHOMCL2655	-	-	-	-	-	-	-	-	-	-	-	-
ORTHOMCL1866	-	-	-	-	-	-	-	-	-	-	-	-
ORTHOMCL2407	-	-	-	-	-	-	-	-	-	-	-	-
ORTHOMCL2199	-	-	-	-	-	-	-	-	-	-	-	-
ORTHOMCL42	-	-	-	-	-	-	-	-	-	-	-	-
ORTHOMCL2106	-	-	-	-	-	-	-	-	-	-	-	-
ORTHOMCL2736	-	-	-	-	-	-	-	-	-	-	-	-
ORTHOMCL2967	-	-	-	-	-	-	-	-	-	-	-	-
ORTHOMCL2	-	-	-	-	-	-	-	-	-	-	-	-
ORTHOMCL3005	-	-	-	-	-	-	-	-	-	-	-	-
ORTHOMCL2084	-	-	-	-	-	-	-	-	-	-	-	-
ORTHOMCL1757	-	-	-	-	-	-	-	-	-	-	-	-
ORTHOMCL2498	-	-	-	-	-	-	-	-	-	-	-	-
ORTHOMCL2670	-	-	-	-	-	-	-	-	-	-	-	-
ORTHOMCL1777	-	-	-	-	-	-	-	-	-	-	-	-
ORTHOMCL1878	-	-	-	-	-	-	-	-	-	-	-	-
ORTHOMCL2922	-	-	-	-	-	-	-	-	-	-	-	-
ORTHOMCL2499	-	-	-	-	-	-	-	-	-	-	-	-
ORTHOMCL1869	-	-	-	-	-	-	-	-	-	-	-	-
ORTHOMCL1868	-	-	-	-	-	-	-	-	-	-	-	-
ORTHOMCL2291	-	-	-	-	-	-	-	-	-	-	-	-
ORTHOMCL2025	-	-	-	-	-	-	-	-	-	-	-	-
ORTHOMCL2775	-	-	-	-	-	-	-	-	-	-	-	-
ORTHOMCL1888	-	-	-	-	-	-	-	-	-	-	-	-
ORTHOMCL2295	-	-	-	-	-	-	-	-	-	-	-	-
ORTHOMCL2550	-	-	-	-	-	-	-	-	-	-	-	-
ORTHOMCL65	-	-	-	-	-	-	-	-	-	-	-	-
ORTHOMCL2765	-	-	-	-	-	-	-	-	-	-	-	-
ORTHOMCL1723	-	-	-	-	-	-	-	-	-	-	-	-
ORTHOMCL1834	-	-	-	-	-	-	-	-	-	-	-	-
ORTHOMCL3006	-	-	-	-	-	-	-	-	-	-	-	-
ORTHOMCL1928	-	-	-	-	-	-	-	-	-	-	-	-
ORTHOMCL1879	-	-	-	-	-	-	-	-	-	-	-	-
ORTHOMCL2005	-	-	-	-	-	-	-	-	-	-	-	-
ORTHOMCL2709	-	-	-	-	-	-	-	-	-	-	-	-
ORTHOMCL1807	-	-	-	-	-	-	-	-	-	-	-	-
ORTHOMCL106	-	-	-	-	-	-	-	-	-	-	-	-
ORTHOMCL2362	-	-	-	-	-	-	-	-	-	-	-	-
ORTHOMCL2689	-	-	-	-	-	-	-	-	-	-	-	-
ORTHOMCL2638	-	-	-	-	-	-	-	-	-	-	-	-
ORTHOMCL2557	-	-	-	-	-	-	-	-	-	-	-	-
ORTHOMCL2861	-	-	-	-	-	-	-	-	-	-	-	-
ORTHOMCL1686	-	-	-	-	-	-	-	-	-	-	-	-
ORTHOMCL2887	-	-	-	-	-	-	-	-	-	-	-	-
ORTHOMCL1860	-	-	-	-	-	-	-	-	-	-	-	-
ORTHOMCL1826	-	-	-	-	-	-	-	-	-	-	-	-
ORTHOMCL2794	-	-	-	-	-	-	-	-	-	-	-	-
ORTHOMCL1957	-	-	-	-	-	-	-	-	-	-	-	-
ORTHOMCL2471	-	-	-	-	-	-	-	-	-	-	-	-
ORTHOMCL2676	-	-	-	-	-	-	-	-	-	-	-	-
ORTHOMCL2172	-	-	-	-	-	-	-	-	-	-	-	-
ORTHOMCL2001	-	-	-	-	-	-	-	-	-	-	-	-
ORTHOMCL1972	-	-	-	-	-	-	-	-	-	-	-	-
ORTHOMCL2377	-	-	-	-	-	-	-	-	-	-	-	-
ORTHOMCL2062	-	-	-	-	-	-	-	-	-	-	-	-
ORTHOMCL1803	-	-	-	-	-	-	-	-	-	-	-	-
ORTHOMCL67	-	-	-	-	-	-	-	-	-	-	-	-
ORTHOMCL2511	-	-	-	-	-	-	-	-	-	-	-	-
ORTHOMCL2329	-	-	-	-	-	-	-	-	-	-	-	-
ORTHOMCL2982	-	-	-	-	-	-	-	-	-	-	-	-
ORTHOMCL40	-	-	-	-	-	-	-	-	-	-	-	-
ORTHOMCL1836	-	-	-	-	-	-	-	-	-	-	-	-
ORTHOMCL2256	-	-	-	-	-	-	-	-	-	-	-	-
ORTHOMCL2706	-	-	-	-	-	-	-	-	-	-	-	-
ORTHOMCL99	-	-	-	-	-	-	-	-	-	-	-	-
ORTHOMCL1701	-	-	-	-	-	-	-	-	-	-	-	-
ORTHOMCL2141	-	-	-	-	-	-	-	-	-	-	-	-
ORTHOMCL2495	-	-	-	-	-	-	-	-	-	-	-	-
ORTHOMCL2083	-	-	-	-	-	-	-	-	-	-	-	-
ORTHOMCL3053	-	-	-	-	-	-	-	-	-	-	-	-
ORTHOMCL2245	-	-	-	-	-	-	-	-	-	-	-	-
ORTHOMCL1652	-	-	-	-	-	-	-	-	-	-	-	-
ORTHOMCL73	-	-	-	-	-	-	-	-	-	-	-	-
ORTHOMCL2310	-	-	-	-	-	-	-	-	-	-	-	-
ORTHOMCL2654	-	-	-	-	-	-	-	-	-	-	-	-
ORTHOMCL2244	-	-	-	-	-	-	-	-	-	-	-	-
ORTHOMCL2350	-	-	-	-	-	-	-	-	-	-	-	-
ORTHOMCL32	-	-	-	-	-	-	-	-	-	-	-	-
ORTHOMCL2626	-	-	-	-	-	-	-	-	-	-	-	-
ORTHOMCL2788	-	-	-	-	-	-	-	-	-	-	-	-
ORTHOMCL2075	-	-	-	-	-	-	-	-	-	-	-	-
ORTHOMCL2486	-	-	-	-	-	-	-	-	-	-	-	-
ORTHOMCL2242	-	-	-	-	-	-	-	-	-	-	-	-
ORTHOMCL2529	-	-	-	-	-	-	-	-	-	-	-	-
ORTHOMCL2636	-	-	-	-	-	-	-	-	-	-	-	-
ORTHOMCL2314	-	-	-	-	-	-	-	-	-	-	-	-
ORTHOMCL2157	-	-	-	-	-	-	-	-	-	-	-	-
ORTHOMCL0	-	-	-	-	-	-	-	-	-	-	-	-
ORTHOMCL2126	-	-	-	-	-	-	-	-	-	-	-	-
ORTHOMCL2623	-	-	-	-	-	-	-	-	-	-	-	-
ORTHOMCL2385	-	-	-	-	-	-	-	-	-	-	-	-
ORTHOMCL1984	-	-	-	-	-	-	-	-	-	-	-	-
ORTHOMCL2807	-	-	-	-	-	-	-	-	-	-	-	-
ORTHOMCL1801	-	-	-	-	-	-	-	-	-	-	-	-
ORTHOMCL2476	-	-	-	-	-	-	-	-	-	-	-	-
ORTHOMCL1808	-	-	-	-	-	-	-	-	-	-	-	-
ORTHOMCL1561	-	-	-	-	-	-	-	-	-	-	-	-
ORTHOMCL2411	-	-	-	-	-	-	-	-	-	-	-	-
ORTHOMCL2017	-	-	-	-	-	-	-	-	-	-	-	-
ORTHOMCL2496	-	-	-	-	-	-	-	-	-	-	-	-
ORTHOMCL1830	-	-	-	-	-	-	-	-	-	-	-	-
ORTHOMCL2801	-	-	-	-	-	-	-	-	-	-	-	-
ORTHOMCL2741	-	-	-	-	-	-	-	-	-	-	-	-
ORTHOMCL3041	-	-	-	-	-	-	-	-	-	-	-	-
ORTHOMCL52	-	-	-	-	-	-	-	-	-	-	-	-
ORTHOMCL1994	-	-	-	-	-	-	-	-	-	-	-	-
ORTHOMCL2168	-	-	-	-	-	-	-	-	-	-	-	-
ORTHOMCL1794	-	-	-	-	-	-	-	-	-	-	-	-
ORTHOMCL79	-	-	-	-	-	-	-	-	-	-	-	-
ORTHOMCL2474	-	-	-	-	-	-	-	-	-	-	-	-
ORTHOMCL1736	-	-	-	-	-	-	-	-	-	-	-	-
ORTHOMCL1829	-	-	-	-	-	-	-	-	-	-	-	-
ORTHOMCL2422	-	-	-	-	-	-	-	-	-	-	-	-
ORTHOMCL2820	-	-	-	-	-	-	-	-	-	-	-	-
ORTHOMCL2058	-	-	-	-	-	-	-	-	-	-	-	-
ORTHOMCL2628	-	-	-	-	-	-	-	-	-	-	-	-
ORTHOMCL1744	-	-	-	-	-	-	-	-	-	-	-	-
ORTHOMCL2582	-	-	-	-	-	-	-	-	-	-	-	-
ORTHOMCL1540	-	-	-	-	-	-	-	-	-	-	-	-
ORTHOMCL2707	-	-	-	-	-	-	-	-	-	-	-	-
ORTHOMCL2783	-	-	-	-	-	-	-	-	-	-	-	-
ORTHOMCL2347	-	-	-	-	-	-	-	-	-	-	-	-
ORTHOMCL2842	-	-	-	-	-	-	-	-	-	-	-	-
ORTHOMCL2450	-	-	-	-	-	-	-	-	-	-	-	-
ORTHOMCL2687	-	-	-	-	-	-	-	-	-	-	-	-
ORTHOMCL1992	-	-	-	-	-	-	-	-	-	-	-	-
ORTHOMCL2427	-	-	-	-	-	-	-	-	-	-	-	-
ORTHOMCL2135	-	-	-	-	-	-	-	-	-	-	-	-
ORTHOMCL2573	-	-	-	-	-	-	-	-	-	-	-	-
ORTHOMCL2873	-	-	-	-	-	-	-	-	-	-	-	-
ORTHOMCL2504	-	-	-	-	-	-	-	-	-	-	-	-
ORTHOMCL2337	-	-	-	-	-	-	-	-	-	-	-	-
ORTHOMCL2470	-	-	-	-	-	-	-	-	-	-	-	-
ORTHOMCL2760	-	-	-	-	-	-	-	-	-	-	-	-
ORTHOMCL2989	-	-	-	-	-	-	-	-	-	-	-	-
ORTHOMCL1865	-	-	-	-	-	-	-	-	-	-	-	-
ORTHOMCL2503	-	-	-	-	-	-	-	-	-	-	-	-
ORTHOMCL11	-	-	-	-	-	-	-	-	-	-	-	-
ORTHOMCL2380	-	-	-	-	-	-	-	-	-	-	-	-
ORTHOMCL2365	-	-	-	-	-	-	-	-	-	-	-	-
ORTHOMCL2230	-	-	-	-	-	-	-	-	-	-	-	-
ORTHOMCL3049	-	-	-	-	-	-	-	-	-	-	-	-
ORTHOMCL2974	-	-	-	-	-	-	-	-	-	-	-	-
ORTHOMCL2217	-	-	-	-	-	-	-	-	-	-	-	-
ORTHOMCL2637	-	-	-	-	-	-	-	-	-	-	-	-
ORTHOMCL2570	-	-	-	-	-	-	-	-	-	-	-	-
ORTHOMCL2526	-	-	-	-	-	-	-	-	-	-	-	-
ORTHOMCL2087	-	-	-	-	-	-	-	-	-	-	-	-
ORTHOMCL1873	-	-	-	-	-	-	-	-	-	-	-	-
ORTHOMCL2634	-	-	-	-	-	-	-	-	-	-	-	-
ORTHOMCL3046	-	-	-	-	-	-	-	-	-	-	-	-
ORTHOMCL2978	-	-	-	-	-	-	-	-	-	-	-	-
ORTHOMCL2916	-	-	-	-	-	-	-	-	-	-	-	-
ORTHOMCL2078	-	-	-	-	-	-	-	-	-	-	-	-
ORTHOMCL1877	-	-	-	-	-	-	-	-	-	-	-	-
ORTHOMCL2043	-	-	-	-	-	-	-	-	-	-	-	-
ORTHOMCL1999	-	-	-	-	-	-	-	-	-	-	-	-
ORTHOMCL2206	-	-	-	-	-	-	-	-	-	-	-	-
ORTHOMCL2808	-	-	-	-	-	-	-	-	-	-	-	-
ORTHOMCL2972	-	-	-	-	-	-	-	-	-	-	-	-
ORTHOMCL2912	-	-	-	-	-	-	-	-	-	-	-	-
ORTHOMCL83	-	-	-	-	-	-	-	-	-	-	-	-
ORTHOMCL1682	-	-	-	-	-	-	-	-	-	-	-	-
ORTHOMCL71	-	-	-	-	-	-	-	-	-	-	-	-
ORTHOMCL2792	-	-	-	-	-	-	-	-	-	-	-	-
ORTHOMCL2119	-	-	-	-	-	-	-	-	-	-	-	-
ORTHOMCL55	-	-	-	-	-	-	-	-	-	-	-	-
ORTHOMCL2769	-	-	-	-	-	-	-	-	-	-	-	-
ORTHOMCL2240	-	-	-	-	-	-	-	-	-	-	-	-
ORTHOMCL2813	-	-	-	-	-	-	-	-	-	-	-	-
ORTHOMCL2081	-	-	-	-	-	-	-	-	-	-	-	-
ORTHOMCL58	-	-	-	-	-	-	-	-	-	-	-	-
ORTHOMCL2491	-	-	-	-	-	-	-	-	-	-	-	-
ORTHOMCL2540	-	-	-	-	-	-	-	-	-	-	-	-
ORTHOMCL1881	-	-	-	-	-	-	-	-	-	-	-	-
ORTHOMCL1977	-	-	-	-	-	-	-	-	-	-	-	-
ORTHOMCL2640	-	-	-	-	-	-	-	-	-	-	-	-
ORTHOMCL1864	-	-	-	-	-	-	-	-	-	-	-	-
ORTHOMCL2435	-	-	-	-	-	-	-	-	-	-	-	-
ORTHOMCL45	-	-	-	-	-	-	-	-	-	-	-	-
ORTHOMCL49	-	-	-	-	-	-	-	-	-	-	-	-
ORTHOMCL2026	-	-	-	-	-	-	-	-	-	-	-	-
ORTHOMCL2344	-	-	-	-	-	-	-	-	-	-	-	-
ORTHOMCL2040	-	-	-	-	-	-	-	-	-	-	-	-
ORTHOMCL2378	-	-	-	-	-	-	-	-	-	-	-	-
ORTHOMCL944	-	-	-	-	-	-	-	-	-	-	-	-
ORTHOMCL2950	-	-	-	-	-	-	-	-	-	-	-	-
ORTHOMCL2639	-	-	-	-	-	-	-	-	-	-	-	-
ORTHOMCL1746	-	-	-	-	-	-	-	-	-	-	-	-
ORTHOMCL3009	-	-	-	-	-	-	-	-	-	-	-	-
ORTHOMCL2364	-	-	-	-	-	-	-	-	-	-	-	-
ORTHOMCL2776	-	-	-	-	-	-	-	-	-	-	-	-
ORTHOMCL1765	-	-	-	-	-	-	-	-	-	-	-	-
ORTHOMCL2171	-	-	-	-	-	-	-	-	-	-	-	-
ORTHOMCL50	-	-	-	-	-	-	-	-	-	-	-	-
ORTHOMCL2530	-	-	-	-	-	-	-	-	-	-	-	-
ORTHOMCL2124	-	-	-	-	-	-	-	-	-	-	-	-
ORTHOMCL2150	-	-	-	-	-	-	-	-	-	-	-	-
ORTHOMCL2761	-	-	-	-	-	-	-	-	-	-	-	-
ORTHOMCL2815	-	-	-	-	-	-	-	-	-	-	-	-
ORTHOMCL2044	-	-	-	-	-	-	-	-	-	-	-	-
ORTHOMCL2229	-	-	-	-	-	-	-	-	-	-	-	-
ORTHOMCL2028	-	-	-	-	-	-	-	-	-	-	-	-
ORTHOMCL2143	-	-	-	-	-	-	-	-	-	-	-	-
ORTHOMCL1689	-	-	-	-	-	-	-	-	-	-	-	-
ORTHOMCL2928	-	-	-	-	-	-	-	-	-	-	-	-
ORTHOMCL2543	-	-	-	-	-	-	-	-	-	-	-	-
ORTHOMCL2396	-	-	-	-	-	-	-	-	-	-	-	-
ORTHOMCL1708	-	-	-	-	-	-	-	-	-	-	-	-
ORTHOMCL2152	-	-	-	-	-	-	-	-	-	-	-	-
ORTHOMCL2738	-	-	-	-	-	-	-	-	-	-	-	-
ORTHOMCL59	-	-	-	-	-	-	-	-	-	-	-	-
ORTHOMCL2869	-	-	-	-	-	-	-	-	-	-	-	-
ORTHOMCL2984	-	-	-	-	-	-	-	-	-	-	-	-
ORTHOMCL2033	-	-	-	-	-	-	-	-	-	-	-	-
ORTHOMCL2356	-	-	-	-	-	-	-	-	-	-	-	-
ORTHOMCL2258	-	-	-	-	-	-	-	-	-	-	-	-
ORTHOMCL90	-	-	-	-	-	-	-	-	-	-	-	-
ORTHOMCL1717	-	-	-	-	-	-	-	-	-	-	-	-
ORTHOMCL2735	-	-	-	-	-	-	-	-	-	-	-	-
ORTHOMCL2089	-	-	-	-	-	-	-	-	-	-	-	-
ORTHOMCL2334	-	-	-	-	-	-	-	-	-	-	-	-
ORTHOMCL2002	-	-	-	-	-	-	-	-	-	-	-	-
ORTHOMCL2277	-	-	-	-	-	-	-	-	-	-	-	-
ORTHOMCL2046	-	-	-	-	-	-	-	-	-	-	-	-
ORTHOMCL2312	-	-	-	-	-	-	-	-	-	-	-	-
ORTHOMCL2336	-	-	-	-	-	-	-	-	-	-	-	-
ORTHOMCL1787	-	-	-	-	-	-	-	-	-	-	-	-
ORTHOMCL2762	-	-	-	-	-	-	-	-	-	-	-	-
ORTHOMCL2649	-	-	-	-	-	-	-	-	-	-	-	-
ORTHOMCL1989	-	-	-	-	-	-	-	-	-	-	-	-
ORTHOMCL2270	-	-	-	-	-	-	-	-	-	-	-	-
ORTHOMCL2778	-	-	-	-	-	-	-	-	-	-	-	-
ORTHOMCL2965	-	-	-	-	-	-	-	-	-	-	-	-
ORTHOMCL1684	-	-	-	-	-	-	-	-	-	-	-	-
ORTHOMCL1751	-	-	-	-	-	-	-	-	-	-	-	-
ORTHOMCL3044	-	-	-	-	-	-	-	-	-	-	-	-
ORTHOMCL1761	-	-	-	-	-	-	-	-	-	-	-	-
ORTHOMCL85	-	-	-	-	-	-	-	-	-	-	-	-
ORTHOMCL2541	-	-	-	-	-	-	-	-	-	-	-	-
ORTHOMCL1695	-	-	-	-	-	-	-	-	-	-	-	-
ORTHOMCL1720	-	-	-	-	-	-	-	-	-	-	-	-
ORTHOMCL1662	-	-	-	-	-	-	-	-	-	-	-	-
ORTHOMCL1890	-	-	-	-	-	-	-	-	-	-	-	-
ORTHOMCL2911	-	-	-	-	-	-	-	-	-	-	-	-
ORTHOMCL1707	-	-	-	-	-	-	-	-	-	-	-	-
ORTHOMCL1968	-	-	-	-	-	-	-	-	-	-	-	-
ORTHOMCL2351	-	-	-	-	-	-	-	-	-	-	-	-
ORTHOMCL1734	-	-	-	-	-	-	-	-	-	-	-	-
ORTHOMCL2341	-	-	-	-	-	-	-	-	-	-	-	-
ORTHOMCL1911	-	-	-	-	-	-	-	-	-	-	-	-
ORTHOMCL2222	-	-	-	-	-	-	-	-	-	-	-	-
ORTHOMCL2284	-	-	-	-	-	-	-	-	-	-	-	-
ORTHOMCL2293	-	-	-	-	-	-	-	-	-	-	-	-
ORTHOMCL2981	-	-	-	-	-	-	-	-	-	-	-	-
ORTHOMCL2692	-	-	-	-	-	-	-	-	-	-	-	-
ORTHOMCL2962	-	-	-	-	-	-	-	-	-	-	-	-
ORTHOMCL2616	-	-	-	-	-	-	-	-	-	-	-	-
ORTHOMCL2068	-	-	-	-	-	-	-	-	-	-	-	-
ORTHOMCL2566	-	-	-	-	-	-	-	-	-	-	-	-
ORTHOMCL1742	-	-	-	-	-	-	-	-	-	-	-	-
ORTHOMCL69	-	-	-	-	-	-	-	-	-	-	-	-
ORTHOMCL1753	-	-	-	-	-	-	-	-	-	-	-	-
ORTHOMCL2973	-	-	-	-	-	-	-	-	-	-	-	-
ORTHOMCL1937	-	-	-	-	-	-	-	-	-	-	-	-
ORTHOMCL2399	-	-	-	-	-	-	-	-	-	-	-	-
ORTHOMCL2250	-	-	-	-	-	-	-	-	-	-	-	-
ORTHOMCL2133	-	-	-	-	-	-	-	-	-	-	-	-
ORTHOMCL1642	-	-	-	-	-	-	-	-	-	-	-	-
ORTHOMCL1694	-	-	-	-	-	-	-	-	-	-	-	-
ORTHOMCL2169	-	-	-	-	-	-	-	-	-	-	-	-
ORTHOMCL2453	-	-	-	-	-	-	-	-	-	-	-	-
ORTHOMCL1671	-	-	-	-	-	-	-	-	-	-	-	-
ORTHOMCL1944	-	-	-	-	-	-	-	-	-	-	-	-
ORTHOMCL1755	-	-	-	-	-	-	-	-	-	-	-	-
ORTHOMCL3037	-	-	-	-	-	-	-	-	-	-	-	-
ORTHOMCL1739	-	-	-	-	-	-	-	-	-	-	-	-
ORTHOMCL2374	-	-	-	-	-	-	-	-	-	-	-	-
ORTHOMCL1548	-	-	-	-	-	-	-	-	-	-	-	-
ORTHOMCL2115	-	-	-	-	-	-	-	-	-	-	-	-
ORTHOMCL2211	-	-	-	-	-	-	-	-	-	-	-	-
ORTHOMCL2579	-	-	-	-	-	-	-	-	-	-	-	-
ORTHOMCL2894	-	-	-	-	-	-	-	-	-	-	-	-
ORTHOMCL2475	-	-	-	-	-	-	-	-	-	-	-	-
ORTHOMCL2770	-	-	-	-	-	-	-	-	-	-	-	-
ORTHOMCL1500	-	-	-	-	-	-	-	-	-	-	-	-
ORTHOMCL1850	-	-	-	-	-	-	-	-	-	-	-	-
ORTHOMCL1715	-	-	-	-	-	-	-	-	-	-	-	-
ORTHOMCL2944	-	-	-	-	-	-	-	-	-	-	-	-
ORTHOMCL2420	-	-	-	-	-	-	-	-	-	-	-	-
ORTHOMCL2672	-	-	-	-	-	-	-	-	-	-	-	-
ORTHOMCL1697	-	-	-	-	-	-	-	-	-	-	-	-
ORTHOMCL2836	-	-	-	-	-	-	-	-	-	-	-	-
ORTHOMCL2653	-	-	-	-	-	-	-	-	-	-	-	-
ORTHOMCL2305	-	-	-	-	-	-	-	-	-	-	-	-
ORTHOMCL1931	-	-	-	-	-	-	-	-	-	-	-	-
ORTHOMCL54	-	-	-	-	-	-	-	-	-	-	-	-
ORTHOMCL1704	-	-	-	-	-	-	-	-	-	-	-	-
ORTHOMCL2400	-	-	-	-	-	-	-	-	-	-	-	-
ORTHOMCL2977	-	-	-	-	-	-	-	-	-	-	-	-
ORTHOMCL2663	-	-	-	-	-	-	-	-	-	-	-	-
ORTHOMCL3023	-	-	-	-	-	-	-	-	-	-	-	-
ORTHOMCL2864	-	-	-	-	-	-	-	-	-	-	-	-
ORTHOMCL2533	-	-	-	-	-	-	-	-	-	-	-	-
ORTHOMCL1842	-	-	-	-	-	-	-	-	-	-	-	-
ORTHOMCL2200	-	-	-	-	-	-	-	-	-	-	-	-
ORTHOMCL2575	-	-	-	-	-	-	-	-	-	-	-	-
ORTHOMCL2059	-	-	-	-	-	-	-	-	-	-	-	-
ORTHOMCL2431	-	-	-	-	-	-	-	-	-	-	-	-
ORTHOMCL2039	-	-	-	-	-	-	-	-	-	-	-	-
ORTHOMCL2610	-	-	-	-	-	-	-	-	-	-	-	-
ORTHOMCL2339	-	-	-	-	-	-	-	-	-	-	-	-
ORTHOMCL1933	-	-	-	-	-	-	-	-	-	-	-	-
ORTHOMCL2567	-	-	-	-	-	-	-	-	-	-	-	-
ORTHOMCL2892	-	-	-	-	-	-	-	-	-	-	-	-
ORTHOMCL1934	-	-	-	-	-	-	-	-	-	-	-	-
ORTHOMCL2070	-	-	-	-	-	-	-	-	-	-	-	-
ORTHOMCL1897	-	-	-	-	-	-	-	-	-	-	-	-
ORTHOMCL2289	-	-	-	-	-	-	-	-	-	-	-	-
ORTHOMCL75	-	-	-	-	-	-	-	-	-	-	-	-
ORTHOMCL118	-	-	-	-	-	-	-	-	-	-	-	-
ORTHOMCL2795	-	-	-	-	-	-	-	-	-	-	-	-
ORTHOMCL72	-	-	-	-	-	-	-	-	-	-	-	-
ORTHOMCL1588	-	-	-	-	-	-	-	-	-	-	-	-
ORTHOMCL1636	-	-	-	-	-	-	-	-	-	-	-	-
ORTHOMCL2409	-	-	-	-	-	-	-	-	-	-	-	-
ORTHOMCL2438	-	-	-	-	-	-	-	-	-	-	-	-
ORTHOMCL2798	-	-	-	-	-	-	-	-	-	-	-	-
ORTHOMCL2128	-	-	-	-	-	-	-	-	-	-	-	-
ORTHOMCL2563	-	-	-	-	-	-	-	-	-	-	-	-
ORTHOMCL2629	-	-	-	-	-	-	-	-	-	-	-	-
ORTHOMCL2832	-	-	-	-	-	-	-	-	-	-	-	-
ORTHOMCL2968	-	-	-	-	-	-	-	-	-	-	-	-
ORTHOMCL2987	-	-	-	-	-	-	-	-	-	-	-	-
ORTHOMCL2372	-	-	-	-	-	-	-	-	-	-	-	-
ORTHOMCL82	-	-	-	-	-	-	-	-	-	-	-	-
ORTHOMCL1678	-	-	-	-	-	-	-	-	-	-	-	-
ORTHOMCL1731	-	-	-	-	-	-	-	-	-	-	-	-
ORTHOMCL2641	-	-	-	-	-	-	-	-	-	-	-	-
ORTHOMCL46	-	-	-	-	-	-	-	-	-	-	-	-
ORTHOMCL2457	-	-	-	-	-	-	-	-	-	-	-	-
ORTHOMCL2220	-	-	-	-	-	-	-	-	-	-	-	-
ORTHOMCL2223	-	-	-	-	-	-	-	-	-	-	-	-
ORTHOMCL1726	-	-	-	-	-	-	-	-	-	-	-	-
ORTHOMCL1853	-	-	-	-	-	-	-	-	-	-	-	-
ORTHOMCL1995	-	-	-	-	-	-	-	-	-	-	-	-
ORTHOMCL1745	-	-	-	-	-	-	-	-	-	-	-	-
ORTHOMCL2193	-	-	-	-	-	-	-	-	-	-	-	-
ORTHOMCL3004	-	-	-	-	-	-	-	-	-	-	-	-
ORTHOMCL2103	-	-	-	-	-	-	-	-	-	-	-	-
ORTHOMCL2614	-	-	-	-	-	-	-	-	-	-	-	-
ORTHOMCL1693	-	-	-	-	-	-	-	-	-	-	-	-
ORTHOMCL3007	-	-	-	-	-	-	-	-	-	-	-	-
ORTHOMCL2328	-	-	-	-	-	-	-	-	-	-	-	-
ORTHOMCL3027	-	-	-	-	-	-	-	-	-	-	-	-
ORTHOMCL1680	-	-	-	-	-	-	-	-	-	-	-	-
ORTHOMCL2323	-	-	-	-	-	-	-	-	-	-	-	-
ORTHOMCL2686	-	-	-	-	-	-	-	-	-	-	-	-
ORTHOMCL146	-	-	-	-	-	-	-	-	-	-	-	-
ORTHOMCL2309	-	-	-	-	-	-	-	-	-	-	-	-
ORTHOMCL1810	-	-	-	-	-	-	-	-	-	-	-	-
ORTHOMCL2534	-	-	-	-	-	-	-	-	-	-	-	-
ORTHOMCL1862	-	-	-	-	-	-	-	-	-	-	-	-
ORTHOMCL2779	-	-	-	-	-	-	-	-	-	-	-	-
ORTHOMCL1861	-	-	-	-	-	-	-	-	-	-	-	-
ORTHOMCL1962	-	-	-	-	-	-	-	-	-	-	-	-
ORTHOMCL2548	-	-	-	-	-	-	-	-	-	-	-	-
ORTHOMCL1918	-	-	-	-	-	-	-	-	-	-	-	-
ORTHOMCL66	-	-	-	-	-	-	-	-	-	-	-	-
ORTHOMCL2615	-	-	-	-	-	-	-	-	-	-	-	-
ORTHOMCL2086	-	-	-	-	-	-	-	-	-	-	-	-
ORTHOMCL2954	-	-	-	-	-	-	-	-	-	-	-	-
ORTHOMCL1613	-	-	-	-	-	-	-	-	-	-	-	-
ORTHOMCL2324	-	-	-	-	-	-	-	-	-	-	-	-
ORTHOMCL1614	-	-	-	-	-	-	-	-	-	-	-	-
ORTHOMCL2737	-	-	-	-	-	-	-	-	-	-	-	-
ORTHOMCL2806	-	-	-	-	-	-	-	-	-	-	-	-
ORTHOMCL2446	-	-	-	-	-	-	-	-	-	-	-	-
ORTHOMCL2740	-	-	-	-	-	-	-	-	-	-	-	-
ORTHOMCL2139	-	-	-	-	-	-	-	-	-	-	-	-
ORTHOMCL2907	-	-	-	-	-	-	-	-	-	-	-	-
ORTHOMCL2624	-	-	-	-	-	-	-	-	-	-	-	-
ORTHOMCL2226	-	-	-	-	-	-	-	-	-	-	-	-
ORTHOMCL2478	-	-	-	-	-	-	-	-	-	-	-	-
ORTHOMCL2625	-	-	-	-	-	-	-	-	-	-	-	-
ORTHOMCL1993	-	-	-	-	-	-	-	-	-	-	-	-
ORTHOMCL1584	-	-	-	-	-	-	-	-	-	-	-	-
ORTHOMCL1870	-	-	-	-	-	-	-	-	-	-	-	-
ORTHOMCL1796	-	-	-	-	-	-	-	-	-	-	-	-
ORTHOMCL2031	-	-	-	-	-	-	-	-	-	-	-	-
ORTHOMCL2484	-	-	-	-	-	-	-	-	-	-	-	-
ORTHOMCL1737	-	-	-	-	-	-	-	-	-	-	-	-
ORTHOMCL1844	-	-	-	-	-	-	-	-	-	-	-	-
ORTHOMCL1996	-	-	-	-	-	-	-	-	-	-	-	-
ORTHOMCL2718	-	-	-	-	-	-	-	-	-	-	-	-
ORTHOMCL1892	-	-	-	-	-	-	-	-	-	-	-	-
ORTHOMCL1841	-	-	-	-	-	-	-	-	-	-	-	-
ORTHOMCL2619	-	-	-	-	-	-	-	-	-	-	-	-
ORTHOMCL1698	-	-	-	-	-	-	-	-	-	-	-	-
ORTHOMCL2538	-	-	-	-	-	-	-	-	-	-	-	-
ORTHOMCL2969	-	-	-	-	-	-	-	-	-	-	-	-
ORTHOMCL30	-	-	-	-	-	-	-	-	-	-	-	-
ORTHOMCL2934	-	-	-	-	-	-	-	-	-	-	-	-
ORTHOMCL1115	-	-	-	-	-	-	-	-	-	-	-	-
ORTHOMCL2030	-	-	-	-	-	-	-	-	-	-	-	-
ORTHOMCL2162	-	-	-	-	-	-	-	-	-	-	-	-
ORTHOMCL68	-	-	-	-	-	-	-	-	-	-	-	-
ORTHOMCL2617	-	-	-	-	-	-	-	-	-	-	-	-
ORTHOMCL2020	-	-	-	-	-	-	-	-	-	-	-	-
ORTHOMCL2343	-	-	-	-	-	-	-	-	-	-	-	-
ORTHOMCL63	-	-	-	-	-	-	-	-	-	-	-	-
ORTHOMCL2734	-	-	-	-	-	-	-	-	-	-	-	-
ORTHOMCL62	-	-	-	-	-	-	-	-	-	-	-	-
ORTHOMCL2231	-	-	-	-	-	-	-	-	-	-	-	-
ORTHOMCL2714	-	-	-	-	-	-	-	-	-	-	-	-
ORTHOMCL2406	-	-	-	-	-	-	-	-	-	-	-	-
ORTHOMCL2979	-	-	-	-	-	-	-	-	-	-	-	-
ORTHOMCL2750	-	-	-	-	-	-	-	-	-	-	-	-
ORTHOMCL2317	-	-	-	-	-	-	-	-	-	-	-	-
ORTHOMCL1893	-	-	-	-	-	-	-	-	-	-	-	-
ORTHOMCL2621	-	-	-	-	-	-	-	-	-	-	-	-
ORTHOMCL2542	-	-	-	-	-	-	-	-	-	-	-	-
ORTHOMCL2398	-	-	-	-	-	-	-	-	-	-	-	-
ORTHOMCL2501	-	-	-	-	-	-	-	-	-	-	-	-
ORTHOMCL2393	-	-	-	-	-	-	-	-	-	-	-	-
ORTHOMCL61	-	-	-	-	-	-	-	-	-	-	-	-
ORTHOMCL2468	-	-	-	-	-	-	-	-	-	-	-	-
ORTHOMCL2353	-	-	-	-	-	-	-	-	-	-	-	-
ORTHOMCL1637	-	-	-	-	-	-	-	-	-	-	-	-
ORTHOMCL2225	-	-	-	-	-	-	-	-	-	-	-	-
ORTHOMCL2207	-	-	-	-	-	-	-	-	-	-	-	-
ORTHOMCL37	-	-	-	-	-	-	-	-	-	-	-	-
ORTHOMCL1990	-	-	-	-	-	-	-	-	-	-	-	-
ORTHOMCL1743	-	-	-	-	-	-	-	-	-	-	-	-
ORTHOMCL1756	-	-	-	-	-	-	-	-	-	-	-	-
ORTHOMCL2924	-	-	-	-	-	-	-	-	-	-	-	-
ORTHOMCL1917	-	-	-	-	-	-	-	-	-	-	-	-
ORTHOMCL2593	-	-	-	-	-	-	-	-	-	-	-	-
ORTHOMCL2390	-	-	-	-	-	-	-	-	-	-	-	-
ORTHOMCL1333	-	-	-	-	-	-	-	-	-	-	-	-
ORTHOMCL2165	-	-	-	-	-	-	-	-	-	-	-	-
ORTHOMCL2018	-	-	-	-	-	-	-	-	-	-	-	-
ORTHOMCL3008	-	-	-	-	-	-	-	-	-	-	-	-
ORTHOMCL3034	-	-	-	-	-	-	-	-	-	-	-	-
ORTHOMCL2241	-	-	-	-	-	-	-	-	-	-	-	-
ORTHOMCL2751	-	-	-	-	-	-	-	-	-	-	-	-
ORTHOMCL2817	-	-	-	-	-	-	-	-	-	-	-	-
ORTHOMCL1820	-	-	-	-	-	-	-	-	-	-	-	-
ORTHOMCL2988	-	-	-	-	-	-	-	-	-	-	-	-
ORTHOMCL2281	-	-	-	-	-	-	-	-	-	-	-	-
ORTHOMCL2727	-	-	-	-	-	-	-	-	-	-	-	-
ORTHOMCL2535	-	-	-	-	-	-	-	-	-	-	-	-
ORTHOMCL1805	-	-	-	-	-	-	-	-	-	-	-	-
ORTHOMCL2645	-	-	-	-	-	-	-	-	-	-	-	-
ORTHOMCL2763	-	-	-	-	-	-	-	-	-	-	-	-
ORTHOMCL2010	-	-	-	-	-	-	-	-	-	-	-	-
ORTHOMCL2449	-	-	-	-	-	-	-	-	-	-	-	-
ORTHOMCL119	-	-	-	-	-	-	-	-	-	-	-	-
ORTHOMCL2949	-	-	-	-	-	-	-	-	-	-	-	-
ORTHOMCL1832	-	-	-	-	-	-	-	-	-	-	-	-
ORTHOMCL2859	-	-	-	-	-	-	-	-	-	-	-	-
ORTHOMCL2384	-	-	-	-	-	-	-	-	-	-	-	-
ORTHOMCL2880	-	-	-	-	-	-	-	-	-	-	-	-
ORTHOMCL2313	-	-	-	-	-	-	-	-	-	-	-	-
ORTHOMCL2732	-	-	-	-	-	-	-	-	-	-	-	-
ORTHOMCL2308	-	-	-	-	-	-	-	-	-	-	-	-
ORTHOMCL2178	-	-	-	-	-	-	-	-	-	-	-	-
ORTHOMCL1900	-	-	-	-	-	-	-	-	-	-	-	-
ORTHOMCL1654	-	-	-	-	-	-	-	-	-	-	-	-
ORTHOMCL2701	-	-	-	-	-	-	-	-	-	-	-	-
ORTHOMCL2935	-	-	-	-	-	-	-	-	-	-	-	-
ORTHOMCL2494	-	-	-	-	-	-	-	-	-	-	-	-
ORTHOMCL2970	-	-	-	-	-	-	-	-	-	-	-	-
ORTHOMCL2753	-	-	-	-	-	-	-	-	-	-	-	-
ORTHOMCL1773	-	-	-	-	-	-	-	-	-	-	-	-
ORTHOMCL2896	-	-	-	-	-	-	-	-	-	-	-	-
ORTHOMCL2455	-	-	-	-	-	-	-	-	-	-	-	-
ORTHOMCL2931	-	-	-	-	-	-	-	-	-	-	-	-
ORTHOMCL1876	-	-	-	-	-	-	-	-	-	-	-	-
ORTHOMCL2188	-	-	-	-	-	-	-	-	-	-	-	-
ORTHOMCL2093	-	-	-	-	-	-	-	-	-	-	-	-
ORTHOMCL81	-	-	-	-	-	-	-	-	-	-	-	-
ORTHOMCL2487	-	-	-	-	-	-	-	-	-	-	-	-
ORTHOMCL1776	-	-	-	-	-	-	-	-	-	-	-	-
ORTHOMCL2251	-	-	-	-	-	-	-	-	-	-	-	-
ORTHOMCL2565	-	-	-	-	-	-	-	-	-	-	-	-
ORTHOMCL2956	-	-	-	-	-	-	-	-	-	-	-	-
ORTHOMCL1983	-	-	-	-	-	-	-	-	-	-	-	-
ORTHOMCL1748	-	-	-	-	-	-	-	-	-	-	-	-
ORTHOMCL1857	-	-	-	-	-	-	-	-	-	-	-	-
ORTHOMCL1985	-	-	-	-	-	-	-	-	-	-	-	-
ORTHOMCL2975	-	-	-	-	-	-	-	-	-	-	-	-
ORTHOMCL2391	-	-	-	-	-	-	-	-	-	-	-	-
ORTHOMCL1987	-	-	-	-	-	-	-	-	-	-	-	-
ORTHOMCL1643	-	-	-	-	-	-	-	-	-	-	-	-
ORTHOMCL2897	-	-	-	-	-	-	-	-	-	-	-	-
ORTHOMCL2436	-	-	-	-	-	-	-	-	-	-	-	-
ORTHOMCL2134	-	-	-	-	-	-	-	-	-	-	-	-
ORTHOMCL2315	-	-	-	-	-	-	-	-	-	-	-	-
ORTHOMCL2933	-	-	-	-	-	-	-	-	-	-	-	-
ORTHOMCL1856	-	-	-	-	-	-	-	-	-	-	-	-
ORTHOMCL1674	-	-	-	-	-	-	-	-	-	-	-	-
ORTHOMCL38	-	-	-	-	-	-	-	-	-	-	-	-
ORTHOMCL1851	-	-	-	-	-	-	-	-	-	-	-	-
ORTHOMCL2186	-	-	-	-	-	-	-	-	-	-	-	-
ORTHOMCL2318	-	-	-	-	-	-	-	-	-	-	-	-
ORTHOMCL2082	-	-	-	-	-	-	-	-	-	-	-	-
ORTHOMCL1760	-	-	-	-	-	-	-	-	-	-	-	-
ORTHOMCL2554	-	-	-	-	-	-	-	-	-	-	-	-
ORTHOMCL2630	-	-	-	-	-	-	-	-	-	-	-	-
ORTHOMCL1733	-	-	-	-	-	-	-	-	-	-	-	-
ORTHOMCL2098	-	-	-	-	-	-	-	-	-	-	-	-
ORTHOMCL2254	-	-	-	-	-	-	-	-	-	-	-	-
ORTHOMCL2720	-	-	-	-	-	-	-	-	-	-	-	-
ORTHOMCL2693	-	-	-	-	-	-	-	-	-	-	-	-
ORTHOMCL1958	-	-	-	-	-	-	-	-	-	-	-	-
ORTHOMCL1970	-	-	-	-	-	-	-	-	-	-	-	-
ORTHOMCL1982	-	-	-	-	-	-	-	-	-	-	-	-
ORTHOMCL2646	-	-	-	-	-	-	-	-	-	-	-	-
ORTHOMCL1867	-	-	-	-	-	-	-	-	-	-	-	-
ORTHOMCL2322	-	-	-	-	-	-	-	-	-	-	-	-
ORTHOMCL1785	-	-	-	-	-	-	-	-	-	-	-	-
ORTHOMCL2335	-	-	-	-	-	-	-	-	-	-	-	-
ORTHOMCL2185	-	-	-	-	-	-	-	-	-	-	-	-
ORTHOMCL3036	-	-	-	-	-	-	-	-	-	-	-	-
ORTHOMCL2463	-	-	-	-	-	-	-	-	-	-	-	-
ORTHOMCL2452	-	-	-	-	-	-	-	-	-	-	-	-
ORTHOMCL2290	-	-	-	-	-	-	-	-	-	-	-	-
ORTHOMCL2101	-	-	-	-	-	-	-	-	-	-	-	-
ORTHOMCL2404	-	-	-	-	-	-	-	-	-	-	-	-
ORTHOMCL2246	-	-	-	-	-	-	-	-	-	-	-	-
ORTHOMCL1797	-	-	-	-	-	-	-	-	-	-	-	-
ORTHOMCL1899	-	-	-	-	-	-	-	-	-	-	-	-
ORTHOMCL2909	-	-	-	-	-	-	-	-	-	-	-	-
ORTHOMCL2373	-	-	-	-	-	-	-	-	-	-	-	-
ORTHOMCL1750	-	-	-	-	-	-	-	-	-	-	-	-
ORTHOMCL2632	-	-	-	-	-	-	-	-	-	-	-	-
ORTHOMCL1822	-	-	-	-	-	-	-	-	-	-	-	-
ORTHOMCL41	-	-	-	-	-	-	-	-	-	-	-	-
ORTHOMCL2032	-	-	-	-	-	-	-	-	-	-	-	-
ORTHOMCL1814	-	-	-	-	-	-	-	-	-	-	-	-
ORTHOMCL2633	-	-	-	-	-	-	-	-	-	-	-	-
ORTHOMCL80	-	-	-	-	-	-	-	-	-	-	-	-
ORTHOMCL76	-	-	-	-	-	-	-	-	-	-	-	-
ORTHOMCL2888	-	-	-	-	-	-	-	-	-	-	-	-
ORTHOMCL1770	-	-	-	-	-	-	-	-	-	-	-	-
ORTHOMCL1986	-	-	-	-	-	-	-	-	-	-	-	-
ORTHOMCL1947	-	-	-	-	-	-	-	-	-	-	-	-
ORTHOMCL1843	-	-	-	-	-	-	-	-	-	-	-	-
ORTHOMCL2656	-	-	-	-	-	-	-	-	-	-	-	-
ORTHOMCL2917	-	-	-	-	-	-	-	-	-	-	-	-
ORTHOMCL1909	-	-	-	-	-	-	-	-	-	-	-	-
ORTHOMCL2572	-	-	-	-	-	-	-	-	-	-	-	-
ORTHOMCL2019	-	-	-	-	-	-	-	-	-	-	-	-
ORTHOMCL1590	-	-	-	-	-	-	-	-	-	-	-	-
ORTHOMCL1960	-	-	-	-	-	-	-	-	-	-	-	-
ORTHOMCL2113	-	-	-	-	-	-	-	-	-	-	-	-
ORTHOMCL2320	-	-	-	-	-	-	-	-	-	-	-	-
ORTHOMCL1945	-	-	-	-	-	-	-	-	-	-	-	-
ORTHOMCL1942	-	-	-	-	-	-	-	-	-	-	-	-
ORTHOMCL1903	-	-	-	-	-	-	-	-	-	-	-	-
ORTHOMCL1887	-	-	-	-	-	-	-	-	-	-	-	-
ORTHOMCL2325	-	-	-	-	-	-	-	-	-	-	-	-
ORTHOMCL2316	-	-	-	-	-	-	-	-	-	-	-	-
ORTHOMCL2506	-	-	-	-	-	-	-	-	-	-	-	-
ORTHOMCL2050	-	-	-	-	-	-	-	-	-	-	-	-
ORTHOMCL2003	-	-	-	-	-	-	-	-	-	-	-	-
ORTHOMCL1827	-	-	-	-	-	-	-	-	-	-	-	-
ORTHOMCL2976	-	-	-	-	-	-	-	-	-	-	-	-
ORTHOMCL103	-	-	-	-	-	-	-	-	-	-	-	-
ORTHOMCL2787	-	-	-	-	-	-	-	-	-	-	-	-
ORTHOMCL2747	-	-	-	-	-	-	-	-	-	-	-	-
ORTHOMCL2467	-	-	-	-	-	-	-	-	-	-	-	-
ORTHOMCL1721	-	-	-	-	-	-	-	-	-	-	-	-
ORTHOMCL2929	-	-	-	-	-	-	-	-	-	-	-	-
ORTHOMCL2283	-	-	-	-	-	-	-	-	-	-	-	-
ORTHOMCL2803	-	-	-	-	-	-	-	-	-	-	-	-
ORTHOMCL1904	-	-	-	-	-	-	-	-	-	-	-	-
ORTHOMCL2142	-	-	-	-	-	-	-	-	-	-	-	-
ORTHOMCL87	-	-	-	-	-	-	-	-	-	-	-	-
ORTHOMCL1649	-	-	-	-	-	-	-	-	-	-	-	-
ORTHOMCL1837	-	-	-	-	-	-	-	-	-	-	-	-
ORTHOMCL3019	-	-	-	-	-	-	-	-	-	-	-	-
ORTHOMCL2448	-	-	-	-	-	-	-	-	-	-	-	-
ORTHOMCL2014	-	-	-	-	-	-	-	-	-	-	-	-
ORTHOMCL2052	-	-	-	-	-	-	-	-	-	-	-	-
ORTHOMCL1914	-	-	-	-	-	-	-	-	-	-	-	-
ORTHOMCL2352	-	-	-	-	-	-	-	-	-	-	-	-
ORTHOMCL39	-	-	-	-	-	-	-	-	-	-	-	-
ORTHOMCL2000	-	-	-	-	-	-	-	-	-	-	-	-
ORTHOMCL1735	-	-	-	-	-	-	-	-	-	-	-	-
ORTHOMCL2920	-	-	-	-	-	-	-	-	-	-	-	-
ORTHOMCL2986	-	-	-	-	-	-	-	-	-	-	-	-
ORTHOMCL1779	-	-	-	-	-	-	-	-	-	-	-	-
ORTHOMCL1740	-	-	-	-	-	-	-	-	-	-	-	-
ORTHOMCL3029	-	-	-	-	-	-	-	-	-	-	-	-
ORTHOMCL1802	-	-	-	-	-	-	-	-	-	-	-	-
ORTHOMCL1973	-	-	-	-	-	-	-	-	-	-	-	-
ORTHOMCL1835	-	-	-	-	-	-	-	-	-	-	-	-
ORTHOMCL2612	-	-	-	-	-	-	-	-	-	-	-	-
ORTHOMCL86	-	-	-	-	-	-	-	-	-	-	-	-
ORTHOMCL2408	-	-	-	-	-	-	-	-	-	-	-	-
ORTHOMCL2644	-	-	-	-	-	-	-	-	-	-	-	-
ORTHOMCL2037	-	-	-	-	-	-	-	-	-	-	-	-
ORTHOMCL78	-	-	-	-	-	-	-	-	-	-	-	-
ORTHOMCL2121	-	-	-	-	-	-	-	-	-	-	-	-
ORTHOMCL2131	-	-	-	-	-	-	-	-	-	-	-	-
ORTHOMCL2622	-	-	-	-	-	-	-	-	-	-	-	-
ORTHOMCL2886	-	-	-	-	-	-	-	-	-	-	-	-
ORTHOMCL2717	-	-	-	-	-	-	-	-	-	-	-	-
ORTHOMCL35	-	-	-	-	-	-	-	-	-	-	-	-
ORTHOMCL3030	-	-	-	-	-	-	-	-	-	-	-	-
ORTHOMCL1895	-	-	-	-	-	-	-	-	-	-	-	-
ORTHOMCL2661	-	-	-	-	-	-	-	-	-	-	-	-
ORTHOMCL1848	-	-	-	-	-	-	-	-	-	-	-	-
ORTHOMCL2613	-	-	-	-	-	-	-	-	-	-	-	-
ORTHOMCL2248	-	-	-	-	-	-	-	-	-	-	-	-
ORTHOMCL2980	-	-	-	-	-	-	-	-	-	-	-	-
ORTHOMCL74	-	-	-	-	-	-	-	-	-	-	-	-
ORTHOMCL2983	-	-	-	-	-	-	-	-	-	-	-	-
ORTHOMCL2412	-	-	-	-	-	-	-	-	-	-	-	-
ORTHOMCL47	-	-	-	-	-	-	-	-	-	-	-	-
ORTHOMCL1696	-	-	-	-	-	-	-	-	-	-	-	-
ORTHOMCL1998	-	-	-	-	-	-	-	-	-	-	-	-
ORTHOMCL2388	-	-	-	-	-	-	-	-	-	-	-	-
ORTHOMCL2549	-	-	-	-	-	-	-	-	-	-	-	-
ORTHOMCL2243	-	-	-	-	-	-	-	-	-	-	-	-
ORTHOMCL1980	-	-	-	-	-	-	-	-	-	-	-	-
ORTHOMCL1758	-	-	-	-	-	-	-	-	-	-	-	-
ORTHOMCL2120	-	-	-	-	-	-	-	-	-	-	-	-
ORTHOMCL114	-	-	-	-	-	-	-	-	-	-	-	-
ORTHOMCL1713	-	-	-	-	-	-	-	-	-	-	-	-
ORTHOMCL2536	-	-	-	-	-	-	-	-	-	-	-	-
ORTHOMCL2772	-	-	-	-	-	-	-	-	-	-	-	-
ORTHOMCL70	-	-	-	-	-	-	-	-	-	-	-	-
ORTHOMCL2874	-	-	-	-	-	-	-	-	-	-	-	-
ORTHOMCL2166	-	-	-	-	-	-	-	-	-	-	-	-
ORTHOMCL2558	-	-	-	-	-	-	-	-	-	-	-	-
ORTHOMCL1702	-	-	-	-	-	-	-	-	-	-	-	-
ORTHOMCL2733	-	-	-	-	-	-	-	-	-	-	-	-
ORTHOMCL2132	-	-	-	-	-	-	-	-	-	-	-	-
ORTHOMCL2288	-	-	-	-	-	-	-	-	-	-	-	-
ORTHOMCL2105	-	-	-	-	-	-	-	-	-	-	-	-
ORTHOMCL1921	-	-	-	-	-	-	-	-	-	-	-	-
ORTHOMCL2176	-	-	-	-	-	-	-	-	-	-	-	-
ORTHOMCL51	-	-	-	-	-	-	-	-	-	-	-	-
ORTHOMCL2327	-	-	-	-	-	-	-	-	-	-	-	-
ORTHOMCL2021	-	-	-	-	-	-	-	-	-	-	-	-
ORTHOMCL1961	-	-	-	-	-	-	-	-	-	-	-	-
ORTHOMCL2809	-	-	-	-	-	-	-	-	-	-	-	-
ORTHOMCL1732	-	-	-	-	-	-	-	-	-	-	-	-
ORTHOMCL3048	-	-	-	-	-	-	-	-	-	-	-	-
ORTHOMCL1988	-	-	-	-	-	-	-	-	-	-	-	-
ORTHOMCL2611	-	-	-	-	-	-	-	-	-	-	-	-
ORTHOMCL2719	-	-	-	-	-	-	-	-	-	-	-	-
ORTHOMCL1902	-	-	-	-	-	-	-	-	-	-	-	-
ORTHOMCL1687	-	-	-	-	-	-	-	-	-	-	-	-
ORTHOMCL1912	-	-	-	-	-	-	-	-	-	-	-	-
ORTHOMCL2167	-	-	-	-	-	-	-	-	-	-	-	-
ORTHOMCL1670	-	-	-	-	-	-	-	-	-	-	-	-
ORTHOMCL2466	-	-	-	-	-	-	-	-	-	-	-	-
ORTHOMCL2104	-	-	-	-	-	-	-	-	-	-	-	-
ORTHOMCL2462	-	-	-	-	-	-	-	-	-	-	-	-
ORTHOMCL1896	-	-	-	-	-	-	-	-	-	-	-	-
ORTHOMCL2451	-	-	-	-	-	-	-	-	-	-	-	-
ORTHOMCL2537	-	-	-	-	-	-	-	-	-	-	-	-
ORTHOMCL1831	-	-	-	-	-	-	-	-	-	-	-	-
ORTHOMCL1730	-	-	-	-	-	-	-	-	-	-	-	-
ORTHOMCL1871	-	-	-	-	-	-	-	-	-	-	-	-
ORTHOMCL3026	-	-	-	-	-	-	-	-	-	-	-	-
ORTHOMCL2848	-	-	-	-	-	-	-	-	-	-	-	-
ORTHOMCL2232	-	-	-	-	-	-	-	-	-	-	-	-
ORTHOMCL2459	-	-	-	-	-	-	-	-	-	-	-	-
ORTHOMCL2647	-	-	-	-	-	-	-	-	-	-	-	-
ORTHOMCL2201	-	-	-	-	-	-	-	-	-	-	-	-
ORTHOMCL1780	-	-	-	-	-	-	-	-	-	-	-	-
ORTHOMCL2560	-	-	-	-	-	-	-	-	-	-	-	-
ORTHOMCL2382	-	-	-	-	-	-	-	-	-	-	-	-
ORTHOMCL1747	-	-	-	-	-	-	-	-	-	-	-	-
ORTHOMCL2971	-	-	-	-	-	-	-	-	-	-	-	-
ORTHOMCL1727	-	-	-	-	-	-	-	-	-	-	-	-
ORTHOMCL2096	-	-	-	-	-	-	-	-	-	-	-	-
ORTHOMCL250	-	-	-	-	-	-	-	-	-	-	-	-
ORTHOMCL668	-	-	-	-	-	-	-	-	-	-	-	-
ORTHOMCL723	-	-	-	-	-	-	-	-	-	-	-	-
ORTHOMCL1170	-	-	-	-	-	-	-	-	-	-	-	-
ORTHOMCL2944	-	-	-	-	-	-	-	-	-	-	-	-
ORTHOMCL185	-	-	-	-	-	-	-	-	-	-	-	-
ORTHOMCL412	-	-	-	-	-	-	-	-	-	-	-	-
ORTHOMCL1199	-	-	-	-	-	-	-	-	-	-	-	-
ORTHOMCL1263	-	-	-	-	-	-	-	-	-	-	-	-
ORTHOMCL2591	-	-	-	-	-	-	-	-	-	-	-	-
ORTHOMCL1066	-	-	-	-	-	-	-	-	-	-	-	-
ORTHOMCL1197	-	-	-	-	-	-	-	-	-	-	-	-
ORTHOMCL669	-	-	-	-	-	-	-	-	-	-	-	-
ORTHOMCL1178	-	-	-	-	-	-	-	-	-	-	-	-
ORTHOMCL199	-	-	-	-	-	-	-	-	-	-	-	-
ORTHOMCL587	-	-	-	-	-	-	-	-	-	-	-	-
ORTHOMCL320	-	-	-	-	-	-	-	-	-	-	-	-
ORTHOMCL1108	-	-	-	-	-	-	-	-	-	-	-	-
ORTHOMCL1128	-	-	-	-	-	-	-	-	-	-	-	-
ORTHOMCL1818	-	-	-	-	-	-	-	-	-	-	-	-
ORTHOMCL2936	-	-	-	-	-	-	-	-	-	-	-	-
ORTHOMCL2422	-	-	-	-	-	-	-	-	-	-	-	-
ORTHOMCL632	-	-	-	-	-	-	-	-	-	-	-	-
ORTHOMCL311	-	-	-	-	-	-	-	-	-	-	-	-
ORTHOMCL220	-	-	-	-	-	-	-	-	-	-	-	-
ORTHOMCL2544	-	-	-	-	-	-	-	-	-	-	-	-
ORTHOMCL2081	-	-	-	-	-	-	-	-	-	-	-	-
ORTHOMCL105	-	-	-	-	-	-	-	-	-	-	-	-
ORTHOMCL1919	-	-	-	-	-	-	-	-	-	-	-	-
ORTHOMCL2785	-	-	-	-	-	-	-	-	-	-	-	-
ORTHOMCL1159	-	-	-	-	-	-	-	-	-	-	-	-
ORTHOMCL168	-	-	-	-	-	-	-	-	-	-	-	-
ORTHOMCL1266	-	-	-	-	-	-	-	-	-	-	-	-
ORTHOMCL1189	-	-	-	-	-	-	-	-	-	-	-	-
ORTHOMCL616	-	-	-	-	-	-	-	-	-	-	-	-
ORTHOMCL341	-	-	-	-	-	-	-	-	-	-	-	-
ORTHOMCL1886	-	-	-	-	-	-	-	-	-	-	-	-
ORTHOMCL2667	-	-	-	-	-	-	-	-	-	-	-	-
ORTHOMCL102	-	-	-	-	-	-	-	-	-	-	-	-
ORTHOMCL463	-	-	-	-	-	-	-	-	-	-	-	-
ORTHOMCL1168	-	-	-	-	-	-	-	-	-	-	-	-
ORTHOMCL1677	-	-	-	-	-	-	-	-	-	-	-	-
ORTHOMCL2861	-	-	-	-	-	-	-	-	-	-	-	-
ORTHOMCL522	-	-	-	-	-	-	-	-	-	-	-	-
ORTHOMCL754	-	-	-	-	-	-	-	-	-	-	-	-
ORTHOMCL1131	-	-	-	-	-	-	-	-	-	-	-	-
ORTHOMCL2343	-	-	-	-	-	-	-	-	-	-	-	-
ORTHOMCL1055	-	-	-	-	-	-	-	-	-	-	-	-
ORTHOMCL1193	-	-	-	-	-	-	-	-	-	-	-	-
ORTHOMCL85	-	-	-	-	-	-	-	-	-	-	-	-
ORTHOMCL2220	-	-	-	-	-	-	-	-	-	-	-	-
ORTHOMCL42	-	-	-	-	-	-	-	-	-	-	-	-
ORTHOMCL2038	-	-	-	-	-	-	-	-	-	-	-	-
ORTHOMCL603	-	-	-	-	-	-	-	-	-	-	-	-
ORTHOMCL323	-	-	-	-	-	-	-	-	-	-	-	-
ORTHOMCL1661	-	-	-	-	-	-	-	-	-	-	-	-
ORTHOMCL1817	-	-	-	-	-	-	-	-	-	-	-	-
ORTHOMCL1483	-	-	-	-	-	-	-	-	-	-	-	-
ORTHOMCL1074	-	-	-	-	-	-	-	-	-	-	-	-
ORTHOMCL697	-	-	-	-	-	-	-	-	-	-	-	-
ORTHOMCL1938	-	-	-	-	-	-	-	-	-	-	-	-
ORTHOMCL921	-	-	-	-	-	-	-	-	-	-	-	-
ORTHOMCL1006	-	-	-	-	-	-	-	-	-	-	-	-
ORTHOMCL1235	-	-	-	-	-	-	-	-	-	-	-	-
ORTHOMCL372	-	-	-	-	-	-	-	-	-	-	-	-
ORTHOMCL923	-	-	-	-	-	-	-	-	-	-	-	-
ORTHOMCL1582	-	-	-	-	-	-	-	-	-	-	-	-
ORTHOMCL2844	-	-	-	-	-	-	-	-	-	-	-	-
ORTHOMCL202	-	-	-	-	-	-	-	-	-	-	-	-
ORTHOMCL648	-	-	-	-	-	-	-	-	-	-	-	-
ORTHOMCL2091	-	-	-	-	-	-	-	-	-	-	-	-
ORTHOMCL1133	-	-	-	-	-	-	-	-	-	-	-	-
ORTHOMCL1830	-	-	-	-	-	-	-	-	-	-	-	-
ORTHOMCL915	-	-	-	-	-	-	-	-	-	-	-	-
ORTHOMCL1712	-	-	-	-	-	-	-	-	-	-	-	-
ORTHOMCL1631	-	-	-	-	-	-	-	-	-	-	-	-
ORTHOMCL1183	-	-	-	-	-	-	-	-	-	-	-	-
ORTHOMCL691	-	-	-	-	-	-	-	-	-	-	-	-
ORTHOMCL1949	-	-	-	-	-	-	-	-	-	-	-	-
ORTHOMCL350	-	-	-	-	-	-	-	-	-	-	-	-
ORTHOMCL1713	-	-	-	-	-	-	-	-	-	-	-	-
ORTHOMCL1561	-	-	-	-	-	-	-	-	-	-	-	-
ORTHOMCL1103	-	-	-	-	-	-	-	-	-	-	-	-
ORTHOMCL419	-	-	-	-	-	-	-	-	-	-	-	-
ORTHOMCL878	-	-	-	-	-	-	-	-	-	-	-	-
ORTHOMCL1671	-	-	-	-	-	-	-	-	-	-	-	-
ORTHOMCL127	-	-	-	-	-	-	-	-	-	-	-	-
ORTHOMCL802	-	-	-	-	-	-	-	-	-	-	-	-
ORTHOMCL656	-	-	-	-	-	-	-	-	-	-	-	-
ORTHOMCL158	-	-	-	-	-	-	-	-	-	-	-	-
ORTHOMCL189	-	-	-	-	-	-	-	-	-	-	-	-
ORTHOMCL1514	-	-	-	-	-	-	-	-	-	-	-	-
ORTHOMCL565	-	-	-	-	-	-	-	-	-	-	-	-
ORTHOMCL1930	-	-	-	-	-	-	-	-	-	-	-	-
ORTHOMCL2165	-	-	-	-	-	-	-	-	-	-	-	-
ORTHOMCL1453	-	-	-	-	-	-	-	-	-	-	-	-
ORTHOMCL1007	-	-	-	-	-	-	-	-	-	-	-	-
ORTHOMCL863	-	-	-	-	-	-	-	-	-	-	-	-
ORTHOMCL829	-	-	-	-	-	-	-	-	-	-	-	-
ORTHOMCL255	-	-	-	-	-	-	-	-	-	-	-	-
ORTHOMCL979	-	-	-	-	-	-	-	-	-	-	-	-
ORTHOMCL1723	-	-	-	-	-	-	-	-	-	-	-	-
ORTHOMCL989	-	-	-	-	-	-	-	-	-	-	-	-
ORTHOMCL394	-	-	-	-	-	-	-	-	-	-	-	-
ORTHOMCL777	-	-	-	-	-	-	-	-	-	-	-	-
ORTHOMCL987	-	-	-	-	-	-	-	-	-	-	-	-
ORTHOMCL2306	-	-	-	-	-	-	-	-	-	-	-	-
ORTHOMCL307	-	-	-	-	-	-	-	-	-	-	-	-
ORTHOMCL1966	-	-	-	-	-	-	-	-	-	-	-	-
ORTHOMCL1277	-	-	-	-	-	-	-	-	-	-	-	-
ORTHOMCL2376	-	-	-	-	-	-	-	-	-	-	-	-
ORTHOMCL100	-	-	-	-	-	-	-	-	-	-	-	-
ORTHOMCL877	-	-	-	-	-	-	-	-	-	-	-	-
ORTHOMCL113	-	-	-	-	-	-	-	-	-	-	-	-
ORTHOMCL1900	-	-	-	-	-	-	-	-	-	-	-	-
ORTHOMCL35	-	-	-	-	-	-	-	-	-	-	-	-
ORTHOMCL284	-	-	-	-	-	-	-	-	-	-	-	-
ORTHOMCL868	-	-	-	-	-	-	-	-	-	-	-	-
ORTHOMCL218	-	-	-	-	-	-	-	-	-	-	-	-
ORTHOMCL2812	-	-	-	-	-	-	-	-	-	-	-	-
ORTHOMCL2538	-	-	-	-	-	-	-	-	-	-	-	-
ORTHOMCL1688	-	-	-	-	-	-	-	-	-	-	-	-
ORTHOMCL572	-	-	-	-	-	-	-	-	-	-	-	-
ORTHOMCL1305	-	-	-	-	-	-	-	-	-	-	-	-
ORTHOMCL245	-	-	-	-	-	-	-	-	-	-	-	-
ORTHOMCL1509	-	-	-	-	-	-	-	-	-	-	-	-
ORTHOMCL165	-	-	-	-	-	-	-	-	-	-	-	-
ORTHOMCL225	-	-	-	-	-	-	-	-	-	-	-	-
ORTHOMCL1644	-	-	-	-	-	-	-	-	-	-	-	-
ORTHOMCL1300	-	-	-	-	-	-	-	-	-	-	-	-
ORTHOMCL2831	-	-	-	-	-	-	-	-	-	-	-	-
ORTHOMCL1522	-	-	-	-	-	-	-	-	-	-	-	-
ORTHOMCL1293	-	-	-	-	-	-	-	-	-	-	-	-
ORTHOMCL1512	-	-	-	-	-	-	-	-	-	-	-	-
ORTHOMCL1584	-	-	-	-	-	-	-	-	-	-	-	-
ORTHOMCL781	-	-	-	-	-	-	-	-	-	-	-	-
ORTHOMCL957	-	-	-	-	-	-	-	-	-	-	-	-
ORTHOMCL1397	-	-	-	-	-	-	-	-	-	-	-	-
ORTHOMCL739	-	-	-	-	-	-	-	-	-	-	-	-
ORTHOMCL970	-	-	-	-	-	-	-	-	-	-	-	-
ORTHOMCL1441	-	-	-	-	-	-	-	-	-	-	-	-
ORTHOMCL905	-	-	-	-	-	-	-	-	-	-	-	-
ORTHOMCL663	-	-	-	-	-	-	-	-	-	-	-	-
ORTHOMCL570	-	-	-	-	-	-	-	-	-	-	-	-
ORTHOMCL574	-	-	-	-	-	-	-	-	-	-	-	-
ORTHOMCL40	-	-	-	-	-	-	-	-	-	-	-	-
ORTHOMCL1450	-	-	-	-	-	-	-	-	-	-	-	-
ORTHOMCL909	-	-	-	-	-	-	-	-	-	-	-	-
ORTHOMCL1167	-	-	-	-	-	-	-	-	-	-	-	-
ORTHOMCL44	-	-	-	-	-	-	-	-	-	-	-	-
ORTHOMCL193	-	-	-	-	-	-	-	-	-	-	-	-
ORTHOMCL1110	-	-	-	-	-	-	-	-	-	-	-	-
ORTHOMCL211	-	-	-	-	-	-	-	-	-	-	-	-
ORTHOMCL266	-	-	-	-	-	-	-	-	-	-	-	-
ORTHOMCL583	-	-	-	-	-	-	-	-	-	-	-	-
ORTHOMCL977	-	-	-	-	-	-	-	-	-	-	-	-
ORTHOMCL2651	-	-	-	-	-	-	-	-	-	-	-	-
ORTHOMCL264	-	-	-	-	-	-	-	-	-	-	-	-
ORTHOMCL2402	-	-	-	-	-	-	-	-	-	-	-	-
ORTHOMCL1452	-	-	-	-	-	-	-	-	-	-	-	-
ORTHOMCL682	-	-	-	-	-	-	-	-	-	-	-	-
ORTHOMCL2206	-	-	-	-	-	-	-	-	-	-	-	-
ORTHOMCL1211	-	-	-	-	-	-	-	-	-	-	-	-
ORTHOMCL1415	-	-	-	-	-	-	-	-	-	-	-	-
ORTHOMCL2562	-	-	-	-	-	-	-	-	-	-	-	-
ORTHOMCL310	-	-	-	-	-	-	-	-	-	-	-	-
ORTHOMCL954	-	-	-	-	-	-	-	-	-	-	-	-
ORTHOMCL1276	-	-	-	-	-	-	-	-	-	-	-	-
ORTHOMCL96	-	-	-	-	-	-	-	-	-	-	-	-
ORTHOMCL180	-	-	-	-	-	-	-	-	-	-	-	-
ORTHOMCL960	-	-	-	-	-	-	-	-	-	-	-	-
ORTHOMCL594	-	-	-	-	-	-	-	-	-	-	-	-
ORTHOMCL2530	-	-	-	-	-	-	-	-	-	-	-	-
ORTHOMCL2296	-	-	-	-	-	-	-	-	-	-	-	-
ORTHOMCL2262	-	-	-	-	-	-	-	-	-	-	-	-
ORTHOMCL1751	-	-	-	-	-	-	-	-	-	-	-	-
ORTHOMCL152	-	-	-	-	-	-	-	-	-	-	-	-
ORTHOMCL2129	-	-	-	-	-	-	-	-	-	-	-	-
ORTHOMCL2568	-	-	-	-	-	-	-	-	-	-	-	-
ORTHOMCL795	-	-	-	-	-	-	-	-	-	-	-	-
ORTHOMCL84	-	-	-	-	-	-	-	-	-	-	-	-
ORTHOMCL1215	-	-	-	-	-	-	-	-	-	-	-	-
ORTHOMCL261	-	-	-	-	-	-	-	-	-	-	-	-
ORTHOMCL1287	-	-	-	-	-	-	-	-	-	-	-	-
ORTHOMCL1354	-	-	-	-	-	-	-	-	-	-	-	-
ORTHOMCL195	-	-	-	-	-	-	-	-	-	-	-	-
ORTHOMCL1684	-	-	-	-	-	-	-	-	-	-	-	-
ORTHOMCL1341	-	-	-	-	-	-	-	-	-	-	-	-
ORTHOMCL1782	-	-	-	-	-	-	-	-	-	-	-	-
ORTHOMCL2264	-	-	-	-	-	-	-	-	-	-	-	-
ORTHOMCL391	-	-	-	-	-	-	-	-	-	-	-	-
ORTHOMCL675	-	-	-	-	-	-	-	-	-	-	-	-
ORTHOMCL2549	-	-	-	-	-	-	-	-	-	-	-	-
ORTHOMCL2963	-	-	-	-	-	-	-	-	-	-	-	-
ORTHOMCL2893	-	-	-	-	-	-	-	-	-	-	-	-
ORTHOMCL2705	-	-	-	-	-	-	-	-	-	-	-	-
ORTHOMCL1565	-	-	-	-	-	-	-	-	-	-	-	-
ORTHOMCL2810	-	-	-	-	-	-	-	-	-	-	-	-
ORTHOMCL164	-	-	-	-	-	-	-	-	-	-	-	-
ORTHOMCL183	-	-	-	-	-	-	-	-	-	-	-	-
ORTHOMCL1794	-	-	-	-	-	-	-	-	-	-	-	-
ORTHOMCL733	-	-	-	-	-	-	-	-	-	-	-	-
ORTHOMCL2741	-	-	-	-	-	-	-	-	-	-	-	-
ORTHOMCL396	-	-	-	-	-	-	-	-	-	-	-	-
ORTHOMCL962	-	-	-	-	-	-	-	-	-	-	-	-
ORTHOMCL1763	-	-	-	-	-	-	-	-	-	-	-	-
ORTHOMCL360	-	-	-	-	-	-	-	-	-	-	-	-
ORTHOMCL1130	-	-	-	-	-	-	-	-	-	-	-	-
ORTHOMCL808	-	-	-	-	-	-	-	-	-	-	-	-
ORTHOMCL1883	-	-	-	-	-	-	-	-	-	-	-	-
ORTHOMCL2119	-	-	-	-	-	-	-	-	-	-	-	-
ORTHOMCL2457	-	-	-	-	-	-	-	-	-	-	-	-
ORTHOMCL693	-	-	-	-	-	-	-	-	-	-	-	-
ORTHOMCL1862	-	-	-	-	-	-	-	-	-	-	-	-
ORTHOMCL1217	-	-	-	-	-	-	-	-	-	-	-	-
ORTHOMCL1160	-	-	-	-	-	-	-	-	-	-	-	-
ORTHOMCL1387	-	-	-	-	-	-	-	-	-	-	-	-
ORTHOMCL1762	-	-	-	-	-	-	-	-	-	-	-	-
ORTHOMCL2511	-	-	-	-	-	-	-	-	-	-	-	-
ORTHOMCL2987	-	-	-	-	-	-	-	-	-	-	-	-
ORTHOMCL813	-	-	-	-	-	-	-	-	-	-	-	-
ORTHOMCL1431	-	-	-	-	-	-	-	-	-	-	-	-
ORTHOMCL1011	-	-	-	-	-	-	-	-	-	-	-	-
ORTHOMCL1190	-	-	-	-	-	-	-	-	-	-	-	-
ORTHOMCL476	-	-	-	-	-	-	-	-	-	-	-	-
ORTHOMCL544	-	-	-	-	-	-	-	-	-	-	-	-
ORTHOMCL410	-	-	-	-	-	-	-	-	-	-	-	-
ORTHOMCL77	-	-	-	-	-	-	-	-	-	-	-	-
ORTHOMCL857	-	-	-	-	-	-	-	-	-	-	-	-
ORTHOMCL1901	-	-	-	-	-	-	-	-	-	-	-	-
ORTHOMCL58	-	-	-	-	-	-	-	-	-	-	-	-
ORTHOMCL339	-	-	-	-	-	-	-	-	-	-	-	-
ORTHOMCL2792	-	-	-	-	-	-	-	-	-	-	-	-
ORTHOMCL1634	-	-	-	-	-	-	-	-	-	-	-	-
ORTHOMCL1724	-	-	-	-	-	-	-	-	-	-	-	-
ORTHOMCL1075	-	-	-	-	-	-	-	-	-	-	-	-
ORTHOMCL815	-	-	-	-	-	-	-	-	-	-	-	-
ORTHOMCL2215	-	-	-	-	-	-	-	-	-	-	-	-
ORTHOMCL2906	-	-	-	-	-	-	-	-	-	-	-	-
ORTHOMCL1994	-	-	-	-	-	-	-	-	-	-	-	-
ORTHOMCL670	-	-	-	-	-	-	-	-	-	-	-	-
ORTHOMCL1119	-	-	-	-	-	-	-	-	-	-	-	-
ORTHOMCL1520	-	-	-	-	-	-	-	-	-	-	-	-
ORTHOMCL2604	-	-	-	-	-	-	-	-	-	-	-	-
ORTHOMCL1449	-	-	-	-	-	-	-	-	-	-	-	-
ORTHOMCL2074	-	-	-	-	-	-	-	-	-	-	-	-
ORTHOMCL872	-	-	-	-	-	-	-	-	-	-	-	-
ORTHOMCL2823	-	-	-	-	-	-	-	-	-	-	-	-
ORTHOMCL2494	-	-	-	-	-	-	-	-	-	-	-	-
ORTHOMCL1267	-	-	-	-	-	-	-	-	-	-	-	-
ORTHOMCL1545	-	-	-	-	-	-	-	-	-	-	-	-
ORTHOMCL1725	-	-	-	-	-	-	-	-	-	-	-	-
ORTHOMCL2852	-	-	-	-	-	-	-	-	-	-	-	-
ORTHOMCL1009	-	-	-	-	-	-	-	-	-	-	-	-
ORTHOMCL253	-	-	-	-	-	-	-	-	-	-	-	-
ORTHOMCL246	-	-	-	-	-	-	-	-	-	-	-	-
ORTHOMCL2891	-	-	-	-	-	-	-	-	-	-	-	-
ORTHOMCL966	-	-	-	-	-	-	-	-	-	-	-	-
ORTHOMCL1608	-	-	-	-	-	-	-	-	-	-	-	-
ORTHOMCL115	-	-	-	-	-	-	-	-	-	-	-	-
ORTHOMCL1141	-	-	-	-	-	-	-	-	-	-	-	-
ORTHOMCL2505	-	-	-	-	-	-	-	-	-	-	-	-
ORTHOMCL2650	-	-	-	-	-	-	-	-	-	-	-	-
ORTHOMCL197	-	-	-	-	-	-	-	-	-	-	-	-
ORTHOMCL235	-	-	-	-	-	-	-	-	-	-	-	-
ORTHOMCL1261	-	-	-	-	-	-	-	-	-	-	-	-
ORTHOMCL315	-	-	-	-	-	-	-	-	-	-	-	-
ORTHOMCL1268	-	-	-	-	-	-	-	-	-	-	-	-
ORTHOMCL1530	-	-	-	-	-	-	-	-	-	-	-	-
ORTHOMCL1979	-	-	-	-	-	-	-	-	-	-	-	-
ORTHOMCL1144	-	-	-	-	-	-	-	-	-	-	-	-
ORTHOMCL3005	-	-	-	-	-	-	-	-	-	-	-	-
ORTHOMCL1356	-	-	-	-	-	-	-	-	-	-	-	-
ORTHOMCL546	-	-	-	-	-	-	-	-	-	-	-	-
ORTHOMCL82	-	-	-	-	-	-	-	-	-	-	-	-
ORTHOMCL1807	-	-	-	-	-	-	-	-	-	-	-	-
ORTHOMCL1398	-	-	-	-	-	-	-	-	-	-	-	-
ORTHOMCL1383	-	-	-	-	-	-	-	-	-	-	-	-
ORTHOMCL370	-	-	-	-	-	-	-	-	-	-	-	-
ORTHOMCL474	-	-	-	-	-	-	-	-	-	-	-	-
ORTHOMCL1430	-	-	-	-	-	-	-	-	-	-	-	-
ORTHOMCL2770	-	-	-	-	-	-	-	-	-	-	-	-
ORTHOMCL1517	-	-	-	-	-	-	-	-	-	-	-	-
ORTHOMCL49	-	-	-	-	-	-	-	-	-	-	-	-
ORTHOMCL2383	-	-	-	-	-	-	-	-	-	-	-	-
ORTHOMCL1173	-	-	-	-	-	-	-	-	-	-	-	-
ORTHOMCL291	-	-	-	-	-	-	-	-	-	-	-	-
ORTHOMCL2662	-	-	-	-	-	-	-	-	-	-	-	-
ORTHOMCL1853	-	-	-	-	-	-	-	-	-	-	-	-
ORTHOMCL249	-	-	-	-	-	-	-	-	-	-	-	-
ORTHOMCL894	-	-	-	-	-	-	-	-	-	-	-	-
ORTHOMCL2736	-	-	-	-	-	-	-	-	-	-	-	-
ORTHOMCL772	-	-	-	-	-	-	-	-	-	-	-	-
ORTHOMCL2542	-	-	-	-	-	-	-	-	-	-	-	-
ORTHOMCL2806	-	-	-	-	-	-	-	-	-	-	-	-
ORTHOMCL1665	-	-	-	-	-	-	-	-	-	-	-	-
ORTHOMCL2026	-	-	-	-	-	-	-	-	-	-	-	-
ORTHOMCL931	-	-	-	-	-	-	-	-	-	-	-	-
ORTHOMCL1012	-	-	-	-	-	-	-	-	-	-	-	-
ORTHOMCL545	-	-	-	-	-	-	-	-	-	-	-	-
ORTHOMCL366	-	-	-	-	-	-	-	-	-	-	-	-
ORTHOMCL1960	-	-	-	-	-	-	-	-	-	-	-	-
ORTHOMCL465	-	-	-	-	-	-	-	-	-	-	-	-
ORTHOMCL153	-	-	-	-	-	-	-	-	-	-	-	-
ORTHOMCL1489	-	-	-	-	-	-	-	-	-	-	-	-
ORTHOMCL2325	-	-	-	-	-	-	-	-	-	-	-	-
ORTHOMCL1138	-	-	-	-	-	-	-	-	-	-	-	-
ORTHOMCL912	-	-	-	-	-	-	-	-	-	-	-	-
ORTHOMCL803	-	-	-	-	-	-	-	-	-	-	-	-
ORTHOMCL2276	-	-	-	-	-	-	-	-	-	-	-	-
ORTHOMCL2291	-	-	-	-	-	-	-	-	-	-	-	-
ORTHOMCL2876	-	-	-	-	-	-	-	-	-	-	-	-
ORTHOMCL2141	-	-	-	-	-	-	-	-	-	-	-	-
ORTHOMCL1587	-	-	-	-	-	-	-	-	-	-	-	-
ORTHOMCL2382	-	-	-	-	-	-	-	-	-	-	-	-
ORTHOMCL1303	-	-	-	-	-	-	-	-	-	-	-	-
ORTHOMCL1059	-	-	-	-	-	-	-	-	-	-	-	-
ORTHOMCL1340	-	-	-	-	-	-	-	-	-	-	-	-
ORTHOMCL641	-	-	-	-	-	-	-	-	-	-	-	-
ORTHOMCL948	-	-	-	-	-	-	-	-	-	-	-	-
ORTHOMCL454	-	-	-	-	-	-	-	-	-	-	-	-
ORTHOMCL581	-	-	-	-	-	-	-	-	-	-	-	-
ORTHOMCL650	-	-	-	-	-	-	-	-	-	-	-	-
ORTHOMCL2224	-	-	-	-	-	-	-	-	-	-	-	-
ORTHOMCL1069	-	-	-	-	-	-	-	-	-	-	-	-
ORTHOMCL256	-	-	-	-	-	-	-	-	-	-	-	-
ORTHOMCL302	-	-	-	-	-	-	-	-	-	-	-	-
ORTHOMCL31	-	-	-	-	-	-	-	-	-	-	-	-
ORTHOMCL1685	-	-	-	-	-	-	-	-	-	-	-	-
ORTHOMCL2731	-	-	-	-	-	-	-	-	-	-	-	-
ORTHOMCL702	-	-	-	-	-	-	-	-	-	-	-	-
ORTHOMCL1094	-	-	-	-	-	-	-	-	-	-	-	-
ORTHOMCL1443	-	-	-	-	-	-	-	-	-	-	-	-
ORTHOMCL1417	-	-	-	-	-	-	-	-	-	-	-	-
ORTHOMCL376	-	-	-	-	-	-	-	-	-	-	-	-
ORTHOMCL666	-	-	-	-	-	-	-	-	-	-	-	-
ORTHOMCL262	-	-	-	-	-	-	-	-	-	-	-	-
ORTHOMCL635	-	-	-	-	-	-	-	-	-	-	-	-
ORTHOMCL597	-	-	-	-	-	-	-	-	-	-	-	-
ORTHOMCL186	-	-	-	-	-	-	-	-	-	-	-	-
ORTHOMCL2159	-	-	-	-	-	-	-	-	-	-	-	-
ORTHOMCL479	-	-	-	-	-	-	-	-	-	-	-	-
ORTHOMCL1433	-	-	-	-	-	-	-	-	-	-	-	-
ORTHOMCL2707	-	-	-	-	-	-	-	-	-	-	-	-
ORTHOMCL2013	-	-	-	-	-	-	-	-	-	-	-	-
ORTHOMCL1093	-	-	-	-	-	-	-	-	-	-	-	-
ORTHOMCL480	-	-	-	-	-	-	-	-	-	-	-	-
ORTHOMCL707	-	-	-	-	-	-	-	-	-	-	-	-
ORTHOMCL749	-	-	-	-	-	-	-	-	-	-	-	-
ORTHOMCL1123	-	-	-	-	-	-	-	-	-	-	-	-
ORTHOMCL2937	-	-	-	-	-	-	-	-	-	-	-	-
ORTHOMCL1243	-	-	-	-	-	-	-	-	-	-	-	-
ORTHOMCL1214	-	-	-	-	-	-	-	-	-	-	-	-
ORTHOMCL703	-	-	-	-	-	-	-	-	-	-	-	-
ORTHOMCL2216	-	-	-	-	-	-	-	-	-	-	-	-
ORTHOMCL1689	-	-	-	-	-	-	-	-	-	-	-	-
ORTHOMCL1767	-	-	-	-	-	-	-	-	-	-	-	-
ORTHOMCL1195	-	-	-	-	-	-	-	-	-	-	-	-
ORTHOMCL1358	-	-	-	-	-	-	-	-	-	-	-	-
ORTHOMCL769	-	-	-	-	-	-	-	-	-	-	-	-
ORTHOMCL531	-	-	-	-	-	-	-	-	-	-	-	-
ORTHOMCL146	-	-	-	-	-	-	-	-	-	-	-	-
ORTHOMCL196	-	-	-	-	-	-	-	-	-	-	-	-
ORTHOMCL820	-	-	-	-	-	-	-	-	-	-	-	-
ORTHOMCL713	-	-	-	-	-	-	-	-	-	-	-	-
ORTHOMCL2365	-	-	-	-	-	-	-	-	-	-	-	-
ORTHOMCL299	-	-	-	-	-	-	-	-	-	-	-	-
ORTHOMCL1400	-	-	-	-	-	-	-	-	-	-	-	-
ORTHOMCL2880	-	-	-	-	-	-	-	-	-	-	-	-
ORTHOMCL318	-	-	-	-	-	-	-	-	-	-	-	-
ORTHOMCL993	-	-	-	-	-	-	-	-	-	-	-	-
ORTHOMCL1032	-	-	-	-	-	-	-	-	-	-	-	-
ORTHOMCL1606	-	-	-	-	-	-	-	-	-	-	-	-
ORTHOMCL585	-	-	-	-	-	-	-	-	-	-	-	-
ORTHOMCL1904	-	-	-	-	-	-	-	-	-	-	-	-
ORTHOMCL2675	-	-	-	-	-	-	-	-	-	-	-	-
ORTHOMCL541	-	-	-	-	-	-	-	-	-	-	-	-
ORTHOMCL673	-	-	-	-	-	-	-	-	-	-	-	-
ORTHOMCL287	-	-	-	-	-	-	-	-	-	-	-	-
ORTHOMCL768	-	-	-	-	-	-	-	-	-	-	-	-
ORTHOMCL207	-	-	-	-	-	-	-	-	-	-	-	-
ORTHOMCL651	-	-	-	-	-	-	-	-	-	-	-	-
ORTHOMCL1375	-	-	-	-	-	-	-	-	-	-	-	-
ORTHOMCL1154	-	-	-	-	-	-	-	-	-	-	-	-
ORTHOMCL136	-	-	-	-	-	-	-	-	-	-	-	-
ORTHOMCL681	-	-	-	-	-	-	-	-	-	-	-	-
ORTHOMCL2701	-	-	-	-	-	-	-	-	-	-	-	-
ORTHOMCL1551	-	-	-	-	-	-	-	-	-	-	-	-
ORTHOMCL356	-	-	-	-	-	-	-	-	-	-	-	-
ORTHOMCL2931	-	-	-	-	-	-	-	-	-	-	-	-
ORTHOMCL2344	-	-	-	-	-	-	-	-	-	-	-	-
ORTHOMCL2850	-	-	-	-	-	-	-	-	-	-	-	-
ORTHOMCL991	-	-	-	-	-	-	-	-	-	-	-	-
ORTHOMCL2465	-	-	-	-	-	-	-	-	-	-	-	-
ORTHOMCL1307	-	-	-	-	-	-	-	-	-	-	-	-
ORTHOMCL2926	-	-	-	-	-	-	-	-	-	-	-	-
ORTHOMCL1884	-	-	-	-	-	-	-	-	-	-	-	-
ORTHOMCL1224	-	-	-	-	-	-	-	-	-	-	-	-
ORTHOMCL1788	-	-	-	-	-	-	-	-	-	-	-	-
ORTHOMCL2492	-	-	-	-	-	-	-	-	-	-	-	-
ORTHOMCL1432	-	-	-	-	-	-	-	-	-	-	-	-
ORTHOMCL1146	-	-	-	-	-	-	-	-	-	-	-	-
ORTHOMCL468	-	-	-	-	-	-	-	-	-	-	-	-
ORTHOMCL1026	-	-	-	-	-	-	-	-	-	-	-	-
ORTHOMCL166	-	-	-	-	-	-	-	-	-	-	-	-
ORTHOMCL125	-	-	-	-	-	-	-	-	-	-	-	-
ORTHOMCL714	-	-	-	-	-	-	-	-	-	-	-	-
ORTHOMCL2271	-	-	-	-	-	-	-	-	-	-	-	-
ORTHOMCL300	-	-	-	-	-	-	-	-	-	-	-	-
ORTHOMCL1562	-	-	-	-	-	-	-	-	-	-	-	-
ORTHOMCL297	-	-	-	-	-	-	-	-	-	-	-	-
ORTHOMCL1720	-	-	-	-	-	-	-	-	-	-	-	-
ORTHOMCL2461	-	-	-	-	-	-	-	-	-	-	-	-
ORTHOMCL790	-	-	-	-	-	-	-	-	-	-	-	-
ORTHOMCL2472	-	-	-	-	-	-	-	-	-	-	-	-
ORTHOMCL2519	-	-	-	-	-	-	-	-	-	-	-	-
ORTHOMCL2436	-	-	-	-	-	-	-	-	-	-	-	-
ORTHOMCL1203	-	-	-	-	-	-	-	-	-	-	-	-
ORTHOMCL1343	-	-	-	-	-	-	-	-	-	-	-	-
ORTHOMCL56	-	-	-	-	-	-	-	-	-	-	-	-
ORTHOMCL1759	-	-	-	-	-	-	-	-	-	-	-	-
ORTHOMCL1114	-	-	-	-	-	-	-	-	-	-	-	-
ORTHOMCL417	-	-	-	-	-	-	-	-	-	-	-	-
ORTHOMCL1244	-	-	-	-	-	-	-	-	-	-	-	-
ORTHOMCL462	-	-	-	-	-	-	-	-	-	-	-	-
ORTHOMCL1330	-	-	-	-	-	-	-	-	-	-	-	-
ORTHOMCL2174	-	-	-	-	-	-	-	-	-	-	-	-
ORTHOMCL1445	-	-	-	-	-	-	-	-	-	-	-	-
ORTHOMCL953	-	-	-	-	-	-	-	-	-	-	-	-
ORTHOMCL571	-	-	-	-	-	-	-	-	-	-	-	-
ORTHOMCL1081	-	-	-	-	-	-	-	-	-	-	-	-
ORTHOMCL719	-	-	-	-	-	-	-	-	-	-	-	-
ORTHOMCL1384	-	-	-	-	-	-	-	-	-	-	-	-
ORTHOMCL1284	-	-	-	-	-	-	-	-	-	-	-	-
ORTHOMCL1566	-	-	-	-	-	-	-	-	-	-	-	-
ORTHOMCL116	-	-	-	-	-	-	-	-	-	-	-	-
ORTHOMCL1258	-	-	-	-	-	-	-	-	-	-	-	-
ORTHOMCL1220	-	-	-	-	-	-	-	-	-	-	-	-
ORTHOMCL2321	-	-	-	-	-	-	-	-	-	-	-	-
ORTHOMCL1092	-	-	-	-	-	-	-	-	-	-	-	-
ORTHOMCL634	-	-	-	-	-	-	-	-	-	-	-	-
ORTHOMCL2355	-	-	-	-	-	-	-	-	-	-	-	-
ORTHOMCL1360	-	-	-	-	-	-	-	-	-	-	-	-
ORTHOMCL2719	-	-	-	-	-	-	-	-	-	-	-	-
ORTHOMCL12	-	-	-	-	-	-	-	-	-	-	-	-
ORTHOMCL575	-	-	-	-	-	-	-	-	-	-	-	-
ORTHOMCL2039	-	-	-	-	-	-	-	-	-	-	-	-
ORTHOMCL472	-	-	-	-	-	-	-	-	-	-	-	-
ORTHOMCL1132	-	-	-	-	-	-	-	-	-	-	-	-
ORTHOMCL205	-	-	-	-	-	-	-	-	-	-	-	-
ORTHOMCL2703	-	-	-	-	-	-	-	-	-	-	-	-
ORTHOMCL608	-	-	-	-	-	-	-	-	-	-	-	-
ORTHOMCL653	-	-	-	-	-	-	-	-	-	-	-	-
ORTHOMCL272	-	-	-	-	-	-	-	-	-	-	-	-
ORTHOMCL416	-	-	-	-	-	-	-	-	-	-	-	-
ORTHOMCL1071	-	-	-	-	-	-	-	-	-	-	-	-
ORTHOMCL99	-	-	-	-	-	-	-	-	-	-	-	-
ORTHOMCL2328	-	-	-	-	-	-	-	-	-	-	-	-
ORTHOMCL280	-	-	-	-	-	-	-	-	-	-	-	-
ORTHOMCL855	-	-	-	-	-	-	-	-	-	-	-	-
ORTHOMCL2226	-	-	-	-	-	-	-	-	-	-	-	-
ORTHOMCL2207	-	-	-	-	-	-	-	-	-	-	-	-
ORTHOMCL766	-	-	-	-	-	-	-	-	-	-	-	-
ORTHOMCL785	-	-	-	-	-	-	-	-	-	-	-	-
ORTHOMCL438	-	-	-	-	-	-	-	-	-	-	-	-
ORTHOMCL1560	-	-	-	-	-	-	-	-	-	-	-	-
ORTHOMCL529	-	-	-	-	-	-	-	-	-	-	-	-
ORTHOMCL1001	-	-	-	-	-	-	-	-	-	-	-	-
ORTHOMCL122	-	-	-	-	-	-	-	-	-	-	-	-
ORTHOMCL1513	-	-	-	-	-	-	-	-	-	-	-	-
ORTHOMCL232	-	-	-	-	-	-	-	-	-	-	-	-
ORTHOMCL758	-	-	-	-	-	-	-	-	-	-	-	-
ORTHOMCL2589	-	-	-	-	-	-	-	-	-	-	-	-
ORTHOMCL1288	-	-	-	-	-	-	-	-	-	-	-	-
ORTHOMCL1859	-	-	-	-	-	-	-	-	-	-	-	-
ORTHOMCL917	-	-	-	-	-	-	-	-	-	-	-	-
ORTHOMCL637	-	-	-	-	-	-	-	-	-	-	-	-
ORTHOMCL308	-	-	-	-	-	-	-	-	-	-	-	-
ORTHOMCL461	-	-	-	-	-	-	-	-	-	-	-	-
ORTHOMCL485	-	-	-	-	-	-	-	-	-	-	-	-
ORTHOMCL2908	-	-	-	-	-	-	-	-	-	-	-	-
ORTHOMCL1334	-	-	-	-	-	-	-	-	-	-	-	-
ORTHOMCL1989	-	-	-	-	-	-	-	-	-	-	-	-
ORTHOMCL688	-	-	-	-	-	-	-	-	-	-	-	-
ORTHOMCL269	-	-	-	-	-	-	-	-	-	-	-	-
ORTHOMCL351	-	-	-	-	-	-	-	-	-	-	-	-
ORTHOMCL2035	-	-	-	-	-	-	-	-	-	-	-	-
ORTHOMCL1575	-	-	-	-	-	-	-	-	-	-	-	-
ORTHOMCL946	-	-	-	-	-	-	-	-	-	-	-	-
ORTHOMCL1876	-	-	-	-	-	-	-	-	-	-	-	-
ORTHOMCL385	-	-	-	-	-	-	-	-	-	-	-	-
ORTHOMCL814	-	-	-	-	-	-	-	-	-	-	-	-
ORTHOMCL831	-	-	-	-	-	-	-	-	-	-	-	-
ORTHOMCL349	-	-	-	-	-	-	-	-	-	-	-	-
ORTHOMCL2484	-	-	-	-	-	-	-	-	-	-	-	-
ORTHOMCL1874	-	-	-	-	-	-	-	-	-	-	-	-
ORTHOMCL335	-	-	-	-	-	-	-	-	-	-	-	-
ORTHOMCL406	-	-	-	-	-	-	-	-	-	-	-	-
ORTHOMCL94	-	-	-	-	-	-	-	-	-	-	-	-
ORTHOMCL1282	-	-	-	-	-	-	-	-	-	-	-	-
ORTHOMCL2198	-	-	-	-	-	-	-	-	-	-	-	-
ORTHOMCL2531	-	-	-	-	-	-	-	-	-	-	-	-
ORTHOMCL293	-	-	-	-	-	-	-	-	-	-	-	-
ORTHOMCL1808	-	-	-	-	-	-	-	-	-	-	-	-
ORTHOMCL271	-	-	-	-	-	-	-	-	-	-	-	-
ORTHOMCL1185	-	-	-	-	-	-	-	-	-	-	-	-
ORTHOMCL458	-	-	-	-	-	-	-	-	-	-	-	-
ORTHOMCL2268	-	-	-	-	-	-	-	-	-	-	-	-
ORTHOMCL509	-	-	-	-	-	-	-	-	-	-	-	-
ORTHOMCL788	-	-	-	-	-	-	-	-	-	-	-	-
ORTHOMCL88	-	-	-	-	-	-	-	-	-	-	-	-
ORTHOMCL312	-	-	-	-	-	-	-	-	-	-	-	-
ORTHOMCL304	-	-	-	-	-	-	-	-	-	-	-	-
ORTHOMCL1777	-	-	-	-	-	-	-	-	-	-	-	-
ORTHOMCL2426	-	-	-	-	-	-	-	-	-	-	-	-
ORTHOMCL2062	-	-	-	-	-	-	-	-	-	-	-	-
ORTHOMCL2284	-	-	-	-	-	-	-	-	-	-	-	-
ORTHOMCL638	-	-	-	-	-	-	-	-	-	-	-	-
ORTHOMCL448	-	-	-	-	-	-	-	-	-	-	-	-
ORTHOMCL1120	-	-	-	-	-	-	-	-	-	-	-	-
ORTHOMCL439	-	-	-	-	-	-	-	-	-	-	-	-
ORTHOMCL2653	-	-	-	-	-	-	-	-	-	-	-	-
ORTHOMCL1018	-	-	-	-	-	-	-	-	-	-	-	-
ORTHOMCL1249	-	-	-	-	-	-	-	-	-	-	-	-
ORTHOMCL1628	-	-	-	-	-	-	-	-	-	-	-	-
ORTHOMCL1089	-	-	-	-	-	-	-	-	-	-	-	-
ORTHOMCL986	-	-	-	-	-	-	-	-	-	-	-	-
ORTHOMCL459	-	-	-	-	-	-	-	-	-	-	-	-
ORTHOMCL961	-	-	-	-	-	-	-	-	-	-	-	-
ORTHOMCL1543	-	-	-	-	-	-	-	-	-	-	-	-
ORTHOMCL1182	-	-	-	-	-	-	-	-	-	-	-	-
ORTHOMCL1833	-	-	-	-	-	-	-	-	-	-	-	-
ORTHOMCL1479	-	-	-	-	-	-	-	-	-	-	-	-
ORTHOMCL1733	-	-	-	-	-	-	-	-	-	-	-	-
ORTHOMCL1467	-	-	-	-	-	-	-	-	-	-	-	-
ORTHOMCL319	-	-	-	-	-	-	-	-	-	-	-	-
ORTHOMCL2927	-	-	-	-	-	-	-	-	-	-	-	-
ORTHOMCL1014	-	-	-	-	-	-	-	-	-	-	-	-
ORTHOMCL427	-	-	-	-	-	-	-	-	-	-	-	-
ORTHOMCL849	-	-	-	-	-	-	-	-	-	-	-	-
ORTHOMCL1090	-	-	-	-	-	-	-	-	-	-	-	-
ORTHOMCL526	-	-	-	-	-	-	-	-	-	-	-	-
ORTHOMCL1352	-	-	-	-	-	-	-	-	-	-	-	-
ORTHOMCL830	-	-	-	-	-	-	-	-	-	-	-	-
ORTHOMCL2794	-	-	-	-	-	-	-	-	-	-	-	-
ORTHOMCL1602	-	-	-	-	-	-	-	-	-	-	-	-
ORTHOMCL2347	-	-	-	-	-	-	-	-	-	-	-	-
ORTHOMCL147	-	-	-	-	-	-	-	-	-	-	-	-
ORTHOMCL1041	-	-	-	-	-	-	-	-	-	-	-	-
ORTHOMCL2600	-	-	-	-	-	-	-	-	-	-	-	-
ORTHOMCL2335	-	-	-	-	-	-	-	-	-	-	-	-
ORTHOMCL1585	-	-	-	-	-	-	-	-	-	-	-	-
ORTHOMCL554	-	-	-	-	-	-	-	-	-	-	-	-
ORTHOMCL2314	-	-	-	-	-	-	-	-	-	-	-	-
ORTHOMCL1180	-	-	-	-	-	-	-	-	-	-	-	-
ORTHOMCL2583	-	-	-	-	-	-	-	-	-	-	-	-
ORTHOMCL2180	-	-	-	-	-	-	-	-	-	-	-	-
ORTHOMCL1162	-	-	-	-	-	-	-	-	-	-	-	-
ORTHOMCL833	-	-	-	-	-	-	-	-	-	-	-	-
ORTHOMCL1589	-	-	-	-	-	-	-	-	-	-	-	-
ORTHOMCL1971	-	-	-	-	-	-	-	-	-	-	-	-
ORTHOMCL601	-	-	-	-	-	-	-	-	-	-	-	-
ORTHOMCL118	-	-	-	-	-	-	-	-	-	-	-	-
ORTHOMCL1504	-	-	-	-	-	-	-	-	-	-	-	-
ORTHOMCL847	-	-	-	-	-	-	-	-	-	-	-	-
ORTHOMCL760	-	-	-	-	-	-	-	-	-	-	-	-
ORTHOMCL2764	-	-	-	-	-	-	-	-	-	-	-	-
ORTHOMCL322	-	-	-	-	-	-	-	-	-	-	-	-
ORTHOMCL1821	-	-	-	-	-	-	-	-	-	-	-	-
ORTHOMCL1434	-	-	-	-	-	-	-	-	-	-	-	-
ORTHOMCL404	-	-	-	-	-	-	-	-	-	-	-	-
ORTHOMCL911	-	-	-	-	-	-	-	-	-	-	-	-
ORTHOMCL1468	-	-	-	-	-	-	-	-	-	-	-	-
ORTHOMCL1024	-	-	-	-	-	-	-	-	-	-	-	-
ORTHOMCL2447	-	-	-	-	-	-	-	-	-	-	-	-
ORTHOMCL2460	-	-	-	-	-	-	-	-	-	-	-	-
ORTHOMCL1548	-	-	-	-	-	-	-	-	-	-	-	-
ORTHOMCL1299	-	-	-	-	-	-	-	-	-	-	-	-
ORTHOMCL2024	-	-	-	-	-	-	-	-	-	-	-	-
ORTHOMCL631	-	-	-	-	-	-	-	-	-	-	-	-
ORTHOMCL1283	-	-	-	-	-	-	-	-	-	-	-	-
ORTHOMCL3012	-	-	-	-	-	-	-	-	-	-	-	-
ORTHOMCL660	-	-	-	-	-	-	-	-	-	-	-	-
ORTHOMCL1583	-	-	-	-	-	-	-	-	-	-	-	-
ORTHOMCL1322	-	-	-	-	-	-	-	-	-	-	-	-
ORTHOMCL393	-	-	-	-	-	-	-	-	-	-	-	-
ORTHOMCL1098	-	-	-	-	-	-	-	-	-	-	-	-
ORTHOMCL399	-	-	-	-	-	-	-	-	-	-	-	-
ORTHOMCL234	-	-	-	-	-	-	-	-	-	-	-	-
ORTHOMCL715	-	-	-	-	-	-	-	-	-	-	-	-
ORTHOMCL963	-	-	-	-	-	-	-	-	-	-	-	-
ORTHOMCL1999	-	-	-	-	-	-	-	-	-	-	-	-
ORTHOMCL1048	-	-	-	-	-	-	-	-	-	-	-	-
ORTHOMCL447	-	-	-	-	-	-	-	-	-	-	-	-
ORTHOMCL2674	-	-	-	-	-	-	-	-	-	-	-	-
ORTHOMCL1043	-	-	-	-	-	-	-	-	-	-	-	-
ORTHOMCL518	-	-	-	-	-	-	-	-	-	-	-	-
ORTHOMCL74	-	-	-	-	-	-	-	-	-	-	-	-
ORTHOMCL1727	-	-	-	-	-	-	-	-	-	-	-	-
ORTHOMCL2320	-	-	-	-	-	-	-	-	-	-	-	-
ORTHOMCL500	-	-	-	-	-	-	-	-	-	-	-	-
ORTHOMCL1809	-	-	-	-	-	-	-	-	-	-	-	-
ORTHOMCL679	-	-	-	-	-	-	-	-	-	-	-	-
ORTHOMCL1682	-	-	-	-	-	-	-	-	-	-	-	-
ORTHOMCL1369	-	-	-	-	-	-	-	-	-	-	-	-
ORTHOMCL3013	-	-	-	-	-	-	-	-	-	-	-	-
ORTHOMCL2228	-	-	-	-	-	-	-	-	-	-	-	-
ORTHOMCL1917	-	-	-	-	-	-	-	-	-	-	-	-
ORTHOMCL276	-	-	-	-	-	-	-	-	-	-	-	-
ORTHOMCL2771	-	-	-	-	-	-	-	-	-	-	-	-
ORTHOMCL2526	-	-	-	-	-	-	-	-	-	-	-	-
ORTHOMCL1060	-	-	-	-	-	-	-	-	-	-	-	-
ORTHOMCL2895	-	-	-	-	-	-	-	-	-	-	-	-
ORTHOMCL828	-	-	-	-	-	-	-	-	-	-	-	-
ORTHOMCL2045	-	-	-	-	-	-	-	-	-	-	-	-
ORTHOMCL1674	-	-	-	-	-	-	-	-	-	-	-	-
ORTHOMCL2106	-	-	-	-	-	-	-	-	-	-	-	-
ORTHOMCL2443	-	-	-	-	-	-	-	-	-	-	-	-
ORTHOMCL2370	-	-	-	-	-	-	-	-	-	-	-	-
ORTHOMCL1577	-	-	-	-	-	-	-	-	-	-	-	-
ORTHOMCL971	-	-	-	-	-	-	-	-	-	-	-	-
ORTHOMCL481	-	-	-	-	-	-	-	-	-	-	-	-
ORTHOMCL1444	-	-	-	-	-	-	-	-	-	-	-	-
ORTHOMCL2979	-	-	-	-	-	-	-	-	-	-	-	-
ORTHOMCL1202	-	-	-	-	-	-	-	-	-	-	-	-
ORTHOMCL732	-	-	-	-	-	-	-	-	-	-	-	-
ORTHOMCL906	-	-	-	-	-	-	-	-	-	-	-	-
ORTHOMCL1088	-	-	-	-	-	-	-	-	-	-	-	-
ORTHOMCL1731	-	-	-	-	-	-	-	-	-	-	-	-
ORTHOMCL401	-	-	-	-	-	-	-	-	-	-	-	-
ORTHOMCL1325	-	-	-	-	-	-	-	-	-	-	-	-
ORTHOMCL2597	-	-	-	-	-	-	-	-	-	-	-	-
ORTHOMCL2229	-	-	-	-	-	-	-	-	-	-	-	-
ORTHOMCL456	-	-	-	-	-	-	-	-	-	-	-	-
ORTHOMCL845	-	-	-	-	-	-	-	-	-	-	-	-
ORTHOMCL1086	-	-	-	-	-	-	-	-	-	-	-	-
ORTHOMCL421	-	-	-	-	-	-	-	-	-	-	-	-
ORTHOMCL444	-	-	-	-	-	-	-	-	-	-	-	-
ORTHOMCL1709	-	-	-	-	-	-	-	-	-	-	-	-
ORTHOMCL2732	-	-	-	-	-	-	-	-	-	-	-	-
ORTHOMCL1574	-	-	-	-	-	-	-	-	-	-	-	-
ORTHOMCL1029	-	-	-	-	-	-	-	-	-	-	-	-
ORTHOMCL2345	-	-	-	-	-	-	-	-	-	-	-	-
ORTHOMCL892	-	-	-	-	-	-	-	-	-	-	-	-
ORTHOMCL2313	-	-	-	-	-	-	-	-	-	-	-	-
ORTHOMCL534	-	-	-	-	-	-	-	-	-	-	-	-
ORTHOMCL2456	-	-	-	-	-	-	-	-	-	-	-	-
ORTHOMCL1887	-	-	-	-	-	-	-	-	-	-	-	-
ORTHOMCL160	-	-	-	-	-	-	-	-	-	-	-	-
ORTHOMCL665	-	-	-	-	-	-	-	-	-	-	-	-
ORTHOMCL1099	-	-	-	-	-	-	-	-	-	-	-	-
ORTHOMCL1409	-	-	-	-	-	-	-	-	-	-	-	-
ORTHOMCL1863	-	-	-	-	-	-	-	-	-	-	-	-
ORTHOMCL671	-	-	-	-	-	-	-	-	-	-	-	-
ORTHOMCL395	-	-	-	-	-	-	-	-	-	-	-	-
ORTHOMCL1078	-	-	-	-	-	-	-	-	-	-	-	-
ORTHOMCL705	-	-	-	-	-	-	-	-	-	-	-	-
ORTHOMCL1527	-	-	-	-	-	-	-	-	-	-	-	-
ORTHOMCL329	-	-	-	-	-	-	-	-	-	-	-	-
ORTHOMCL1396	-	-	-	-	-	-	-	-	-	-	-	-
ORTHOMCL2968	-	-	-	-	-	-	-	-	-	-	-	-
ORTHOMCL210	-	-	-	-	-	-	-	-	-	-	-	-
ORTHOMCL422	-	-	-	-	-	-	-	-	-	-	-	-
ORTHOMCL420	-	-	-	-	-	-	-	-	-	-	-	-
ORTHOMCL789	-	-	-	-	-	-	-	-	-	-	-	-
ORTHOMCL233	-	-	-	-	-	-	-	-	-	-	-	-
ORTHOMCL1395	-	-	-	-	-	-	-	-	-	-	-	-
ORTHOMCL708	-	-	-	-	-	-	-	-	-	-	-	-
ORTHOMCL2574	-	-	-	-	-	-	-	-	-	-	-	-
ORTHOMCL985	-	-	-	-	-	-	-	-	-	-	-	-
ORTHOMCL759	-	-	-	-	-	-	-	-	-	-	-	-
ORTHOMCL1459	-	-	-	-	-	-	-	-	-	-	-	-
ORTHOMCL1953	-	-	-	-	-	-	-	-	-	-	-	-
ORTHOMCL726	-	-	-	-	-	-	-	-	-	-	-	-
ORTHOMCL1091	-	-	-	-	-	-	-	-	-	-	-	-
ORTHOMCL1772	-	-	-	-	-	-	-	-	-	-	-	-
ORTHOMCL1155	-	-	-	-	-	-	-	-	-	-	-	-
ORTHOMCL2966	-	-	-	-	-	-	-	-	-	-	-	-
ORTHOMCL1667	-	-	-	-	-	-	-	-	-	-	-	-
ORTHOMCL51	-	-	-	-	-	-	-	-	-	-	-	-
ORTHOMCL1264	-	-	-	-	-	-	-	-	-	-	-	-
ORTHOMCL1755	-	-	-	-	-	-	-	-	-	-	-	-
ORTHOMCL1541	-	-	-	-	-	-	-	-	-	-	-	-
ORTHOMCL1936	-	-	-	-	-	-	-	-	-	-	-	-
ORTHOMCL1937	-	-	-	-	-	-	-	-	-	-	-	-
ORTHOMCL1622	-	-	-	-	-	-	-	-	-	-	-	-
ORTHOMCL2358	-	-	-	-	-	-	-	-	-	-	-	-
ORTHOMCL983	-	-	-	-	-	-	-	-	-	-	-	-
ORTHOMCL2467	-	-	-	-	-	-	-	-	-	-	-	-
ORTHOMCL3009	-	-	-	-	-	-	-	-	-	-	-	-
ORTHOMCL1188	-	-	-	-	-	-	-	-	-	-	-	-
ORTHOMCL657	-	-	-	-	-	-	-	-	-	-	-	-
ORTHOMCL834	-	-	-	-	-	-	-	-	-	-	-	-
ORTHOMCL1916	-	-	-	-	-	-	-	-	-	-	-	-
ORTHOMCL2733	-	-	-	-	-	-	-	-	-	-	-	-
ORTHOMCL999	-	-	-	-	-	-	-	-	-	-	-	-
ORTHOMCL756	-	-	-	-	-	-	-	-	-	-	-	-
ORTHOMCL2139	-	-	-	-	-	-	-	-	-	-	-	-
ORTHOMCL2428	-	-	-	-	-	-	-	-	-	-	-	-
ORTHOMCL918	-	-	-	-	-	-	-	-	-	-	-	-
ORTHOMCL995	-	-	-	-	-	-	-	-	-	-	-	-
ORTHOMCL70	-	-	-	-	-	-	-	-	-	-	-	-
ORTHOMCL550	-	-	-	-	-	-	-	-	-	-	-	-
ORTHOMCL72	-	-	-	-	-	-	-	-	-	-	-	-
ORTHOMCL182	-	-	-	-	-	-	-	-	-	-	-	-
ORTHOMCL2210	-	-	-	-	-	-	-	-	-	-	-	-
ORTHOMCL2750	-	-	-	-	-	-	-	-	-	-	-	-
ORTHOMCL902	-	-	-	-	-	-	-	-	-	-	-	-
ORTHOMCL2342	-	-	-	-	-	-	-	-	-	-	-	-
ORTHOMCL540	-	-	-	-	-	-	-	-	-	-	-	-
ORTHOMCL306	-	-	-	-	-	-	-	-	-	-	-	-
ORTHOMCL1238	-	-	-	-	-	-	-	-	-	-	-	-
ORTHOMCL1448	-	-	-	-	-	-	-	-	-	-	-	-
ORTHOMCL2338	-	-	-	-	-	-	-	-	-	-	-	-
ORTHOMCL365	-	-	-	-	-	-	-	-	-	-	-	-
ORTHOMCL2299	-	-	-	-	-	-	-	-	-	-	-	-
ORTHOMCL2566	-	-	-	-	-	-	-	-	-	-	-	-
ORTHOMCL997	-	-	-	-	-	-	-	-	-	-	-	-
ORTHOMCL955	-	-	-	-	-	-	-	-	-	-	-	-
ORTHOMCL2374	-	-	-	-	-	-	-	-	-	-	-	-
ORTHOMCL228	-	-	-	-	-	-	-	-	-	-	-	-
ORTHOMCL2288	-	-	-	-	-	-	-	-	-	-	-	-
ORTHOMCL214	-	-	-	-	-	-	-	-	-	-	-	-
ORTHOMCL1216	-	-	-	-	-	-	-	-	-	-	-	-
ORTHOMCL2545	-	-	-	-	-	-	-	-	-	-	-	-
ORTHOMCL144	-	-	-	-	-	-	-	-	-	-	-	-
ORTHOMCL1535	-	-	-	-	-	-	-	-	-	-	-	-
ORTHOMCL388	-	-	-	-	-	-	-	-	-	-	-	-
ORTHOMCL1169	-	-	-	-	-	-	-	-	-	-	-	-
ORTHOMCL1411	-	-	-	-	-	-	-	-	-	-	-	-
ORTHOMCL375	-	-	-	-	-	-	-	-	-	-	-	-
ORTHOMCL2182	-	-	-	-	-	-	-	-	-	-	-	-
ORTHOMCL806	-	-	-	-	-	-	-	-	-	-	-	-
ORTHOMCL1858	-	-	-	-	-	-	-	-	-	-	-	-
ORTHOMCL1828	-	-	-	-	-	-	-	-	-	-	-	-
ORTHOMCL1181	-	-	-	-	-	-	-	-	-	-	-	-
ORTHOMCL1735	-	-	-	-	-	-	-	-	-	-	-	-
ORTHOMCL2270	-	-	-	-	-	-	-	-	-	-	-	-
ORTHOMCL880	-	-	-	-	-	-	-	-	-	-	-	-
ORTHOMCL1337	-	-	-	-	-	-	-	-	-	-	-	-
ORTHOMCL423	-	-	-	-	-	-	-	-	-	-	-	-
ORTHOMCL1721	-	-	-	-	-	-	-	-	-	-	-	-
ORTHOMCL434	-	-	-	-	-	-	-	-	-	-	-	-
ORTHOMCL2677	-	-	-	-	-	-	-	-	-	-	-	-
ORTHOMCL2399	-	-	-	-	-	-	-	-	-	-	-	-
ORTHOMCL2414	-	-	-	-	-	-	-	-	-	-	-	-
ORTHOMCL1881	-	-	-	-	-	-	-	-	-	-	-	-
ORTHOMCL298	-	-	-	-	-	-	-	-	-	-	-	-
ORTHOMCL2366	-	-	-	-	-	-	-	-	-	-	-	-
ORTHOMCL2666	-	-	-	-	-	-	-	-	-	-	-	-
ORTHOMCL1475	-	-	-	-	-	-	-	-	-	-	-	-
ORTHOMCL566	-	-	-	-	-	-	-	-	-	-	-	-
ORTHOMCL126	-	-	-	-	-	-	-	-	-	-	-	-
ORTHOMCL2745	-	-	-	-	-	-	-	-	-	-	-	-
ORTHOMCL1344	-	-	-	-	-	-	-	-	-	-	-	-
ORTHOMCL2588	-	-	-	-	-	-	-	-	-	-	-	-
ORTHOMCL724	-	-	-	-	-	-	-	-	-	-	-	-
ORTHOMCL1617	-	-	-	-	-	-	-	-	-	-	-	-
ORTHOMCL139	-	-	-	-	-	-	-	-	-	-	-	-
ORTHOMCL700	-	-	-	-	-	-	-	-	-	-	-	-
ORTHOMCL1335	-	-	-	-	-	-	-	-	-	-	-	-
ORTHOMCL260	-	-	-	-	-	-	-	-	-	-	-	-
ORTHOMCL582	-	-	-	-	-	-	-	-	-	-	-	-
ORTHOMCL2286	-	-	-	-	-	-	-	-	-	-	-	-
ORTHOMCL282	-	-	-	-	-	-	-	-	-	-	-	-
ORTHOMCL2962	-	-	-	-	-	-	-	-	-	-	-	-
ORTHOMCL326	-	-	-	-	-	-	-	-	-	-	-	-
ORTHOMCL494	-	-	-	-	-	-	-	-	-	-	-	-
ORTHOMCL717	-	-	-	-	-	-	-	-	-	-	-	-
ORTHOMCL1072	-	-	-	-	-	-	-	-	-	-	-	-
ORTHOMCL2025	-	-	-	-	-	-	-	-	-	-	-	-
ORTHOMCL1609	-	-	-	-	-	-	-	-	-	-	-	-
ORTHOMCL850	-	-	-	-	-	-	-	-	-	-	-	-
ORTHOMCL2300	-	-	-	-	-	-	-	-	-	-	-	-
ORTHOMCL1478	-	-	-	-	-	-	-	-	-	-	-	-
ORTHOMCL257	-	-	-	-	-	-	-	-	-	-	-	-
ORTHOMCL801	-	-	-	-	-	-	-	-	-	-	-	-
ORTHOMCL633	-	-	-	-	-	-	-	-	-	-	-	-
ORTHOMCL1610	-	-	-	-	-	-	-	-	-	-	-	-
ORTHOMCL884	-	-	-	-	-	-	-	-	-	-	-	-
ORTHOMCL47	-	-	-	-	-	-	-	-	-	-	-	-
ORTHOMCL836	-	-	-	-	-	-	-	-	-	-	-	-
ORTHOMCL1366	-	-	-	-	-	-	-	-	-	-	-	-
ORTHOMCL2329	-	-	-	-	-	-	-	-	-	-	-	-
ORTHOMCL1174	-	-	-	-	-	-	-	-	-	-	-	-
ORTHOMCL642	-	-	-	-	-	-	-	-	-	-	-	-
ORTHOMCL659	-	-	-	-	-	-	-	-	-	-	-	-
ORTHOMCL824	-	-	-	-	-	-	-	-	-	-	-	-
ORTHOMCL2972	-	-	-	-	-	-	-	-	-	-	-	-
ORTHOMCL2113	-	-	-	-	-	-	-	-	-	-	-	-
ORTHOMCL2333	-	-	-	-	-	-	-	-	-	-	-	-
ORTHOMCL2265	-	-	-	-	-	-	-	-	-	-	-	-
ORTHOMCL2393	-	-	-	-	-	-	-	-	-	-	-	-
ORTHOMCL357	-	-	-	-	-	-	-	-	-	-	-	-
ORTHOMCL265	-	-	-	-	-	-	-	-	-	-	-	-
ORTHOMCL2501	-	-	-	-	-	-	-	-	-	-	-	-
ORTHOMCL1832	-	-	-	-	-	-	-	-	-	-	-	-
ORTHOMCL844	-	-	-	-	-	-	-	-	-	-	-	-
ORTHOMCL860	-	-	-	-	-	-	-	-	-	-	-	-
ORTHOMCL1811	-	-	-	-	-	-	-	-	-	-	-	-
ORTHOMCL493	-	-	-	-	-	-	-	-	-	-	-	-
ORTHOMCL871	-	-	-	-	-	-	-	-	-	-	-	-
ORTHOMCL1680	-	-	-	-	-	-	-	-	-	-	-	-
ORTHOMCL1096	-	-	-	-	-	-	-	-	-	-	-	-
ORTHOMCL1469	-	-	-	-	-	-	-	-	-	-	-	-
ORTHOMCL46	-	-	-	-	-	-	-	-	-	-	-	-
ORTHOMCL2301	-	-	-	-	-	-	-	-	-	-	-	-
ORTHOMCL328	-	-	-	-	-	-	-	-	-	-	-	-
ORTHOMCL2140	-	-	-	-	-	-	-	-	-	-	-	-
ORTHOMCL875	-	-	-	-	-	-	-	-	-	-	-	-
ORTHOMCL1959	-	-	-	-	-	-	-	-	-	-	-	-
ORTHOMCL2319	-	-	-	-	-	-	-	-	-	-	-	-
ORTHOMCL1604	-	-	-	-	-	-	-	-	-	-	-	-
ORTHOMCL2789	-	-	-	-	-	-	-	-	-	-	-	-
ORTHOMCL748	-	-	-	-	-	-	-	-	-	-	-	-
ORTHOMCL598	-	-	-	-	-	-	-	-	-	-	-	-
ORTHOMCL1502	-	-	-	-	-	-	-	-	-	-	-	-
ORTHOMCL2232	-	-	-	-	-	-	-	-	-	-	-	-
ORTHOMCL811	-	-	-	-	-	-	-	-	-	-	-	-
ORTHOMCL1940	-	-	-	-	-	-	-	-	-	-	-	-
ORTHOMCL263	-	-	-	-	-	-	-	-	-	-	-	-
ORTHOMCL2842	-	-	-	-	-	-	-	-	-	-	-	-
ORTHOMCL505	-	-	-	-	-	-	-	-	-	-	-	-
ORTHOMCL66	-	-	-	-	-	-	-	-	-	-	-	-
ORTHOMCL2879	-	-	-	-	-	-	-	-	-	-	-	-
ORTHOMCL1697	-	-	-	-	-	-	-	-	-	-	-	-
ORTHOMCL1646	-	-	-	-	-	-	-	-	-	-	-	-
ORTHOMCL1113	-	-	-	-	-	-	-	-	-	-	-	-
ORTHOMCL424	-	-	-	-	-	-	-	-	-	-	-	-
ORTHOMCL2222	-	-	-	-	-	-	-	-	-	-	-	-
ORTHOMCL1711	-	-	-	-	-	-	-	-	-	-	-	-
ORTHOMCL1769	-	-	-	-	-	-	-	-	-	-	-	-
ORTHOMCL654	-	-	-	-	-	-	-	-	-	-	-	-
ORTHOMCL238	-	-	-	-	-	-	-	-	-	-	-	-
ORTHOMCL1363	-	-	-	-	-	-	-	-	-	-	-	-
ORTHOMCL2036	-	-	-	-	-	-	-	-	-	-	-	-
ORTHOMCL2184	-	-	-	-	-	-	-	-	-	-	-	-
ORTHOMCL996	-	-	-	-	-	-	-	-	-	-	-	-
ORTHOMCL1781	-	-	-	-	-	-	-	-	-	-	-	-
ORTHOMCL1708	-	-	-	-	-	-	-	-	-	-	-	-
ORTHOMCL1438	-	-	-	-	-	-	-	-	-	-	-	-
ORTHOMCL800	-	-	-	-	-	-	-	-	-	-	-	-
ORTHOMCL1698	-	-	-	-	-	-	-	-	-	-	-	-
ORTHOMCL2921	-	-	-	-	-	-	-	-	-	-	-	-
ORTHOMCL1033	-	-	-	-	-	-	-	-	-	-	-	-
ORTHOMCL786	-	-	-	-	-	-	-	-	-	-	-	-
ORTHOMCL720	-	-	-	-	-	-	-	-	-	-	-	-
ORTHOMCL1292	-	-	-	-	-	-	-	-	-	-	-	-
ORTHOMCL1256	-	-	-	-	-	-	-	-	-	-	-	-
ORTHOMCL2096	-	-	-	-	-	-	-	-	-	-	-	-
ORTHOMCL592	-	-	-	-	-	-	-	-	-	-	-	-
ORTHOMCL129	-	-	-	-	-	-	-	-	-	-	-	-
ORTHOMCL840	-	-	-	-	-	-	-	-	-	-	-	-
ORTHOMCL2767	-	-	-	-	-	-	-	-	-	-	-	-
ORTHOMCL1981	-	-	-	-	-	-	-	-	-	-	-	-
ORTHOMCL1888	-	-	-	-	-	-	-	-	-	-	-	-
ORTHOMCL1166	-	-	-	-	-	-	-	-	-	-	-	-
ORTHOMCL497	-	-	-	-	-	-	-	-	-	-	-	-
ORTHOMCL1324	-	-	-	-	-	-	-	-	-	-	-	-
ORTHOMCL883	-	-	-	-	-	-	-	-	-	-	-	-
ORTHOMCL109	-	-	-	-	-	-	-	-	-	-	-	-
ORTHOMCL2990	-	-	-	-	-	-	-	-	-	-	-	-
ORTHOMCL775	-	-	-	-	-	-	-	-	-	-	-	-
ORTHOMCL1317	-	-	-	-	-	-	-	-	-	-	-	-
ORTHOMCL689	-	-	-	-	-	-	-	-	-	-	-	-
ORTHOMCL2541	-	-	-	-	-	-	-	-	-	-	-	-
ORTHOMCL1364	-	-	-	-	-	-	-	-	-	-	-	-
ORTHOMCL1466	-	-	-	-	-	-	-	-	-	-	-	-
ORTHOMCL776	-	-	-	-	-	-	-	-	-	-	-	-
ORTHOMCL590	-	-	-	-	-	-	-	-	-	-	-	-
ORTHOMCL1730	-	-	-	-	-	-	-	-	-	-	-	-
ORTHOMCL1281	-	-	-	-	-	-	-	-	-	-	-	-
ORTHOMCL128	-	-	-	-	-	-	-	-	-	-	-	-
ORTHOMCL945	-	-	-	-	-	-	-	-	-	-	-	-
ORTHOMCL1255	-	-	-	-	-	-	-	-	-	-	-	-
ORTHOMCL647	-	-	-	-	-	-	-	-	-	-	-	-
ORTHOMCL567	-	-	-	-	-	-	-	-	-	-	-	-
ORTHOMCL2594	-	-	-	-	-	-	-	-	-	-	-	-
ORTHOMCL2754	-	-	-	-	-	-	-	-	-	-	-	-
ORTHOMCL1274	-	-	-	-	-	-	-	-	-	-	-	-
ORTHOMCL1801	-	-	-	-	-	-	-	-	-	-	-	-
ORTHOMCL1403	-	-	-	-	-	-	-	-	-	-	-	-
ORTHOMCL1388	-	-	-	-	-	-	-	-	-	-	-	-
ORTHOMCL2769	-	-	-	-	-	-	-	-	-	-	-	-
ORTHOMCL925	-	-	-	-	-	-	-	-	-	-	-	-
ORTHOMCL352	-	-	-	-	-	-	-	-	-	-	-	-
ORTHOMCL1102	-	-	-	-	-	-	-	-	-	-	-	-
ORTHOMCL2420	-	-	-	-	-	-	-	-	-	-	-	-
ORTHOMCL274	-	-	-	-	-	-	-	-	-	-	-	-
ORTHOMCL1620	-	-	-	-	-	-	-	-	-	-	-	-
ORTHOMCL710	-	-	-	-	-	-	-	-	-	-	-	-
ORTHOMCL1792	-	-	-	-	-	-	-	-	-	-	-	-
ORTHOMCL1250	-	-	-	-	-	-	-	-	-	-	-	-
ORTHOMCL2400	-	-	-	-	-	-	-	-	-	-	-	-
[truncated: 542 more rows]

## Sheet: sequences
ORTHOMCL56: RL07_01561 JVV01_02140 MV1AUS_02285 MV3AUS_02287 RL03_00421 RL05_00409 RL06_00373 1252CHN_02173 RL08_00297 RL09_00273 RL10_00270 RL11_01695 RL13_00428 RL14_00406 RL15_00405 RL16_00434 RL17_00411 RL19_00415 RL21_00418 RL23_01734 RL24_00408 RL25_01447 RL26_01543 RL27_00419 RL28_00429 RL29_00389 RL30_00413 RL32_00419 RL33_01500 SJ3CUS_02119 VMC1_00495 VMC2_01819 VMC4_02321 VMC6_02301 VMC…
>RL07_01561 (model 2)
MLNNWIREYKKNGYNVIIKQKGRPARDQRKAEISQETGERDPAAERRKLAIAYCERIRKKTKCLGSRRSEEIARVITDLRQEFKVSLNYVLAAIAEHPELPIIARSSYYKIIKRQPVKPKRSKLIARIHEIFNHHQGRYGYRRVALQLIREGWKVTEKTVRYWMHKLGLKGIRRNKRKYSSYKGTIGKIAPNLIHRDFFAALPNTKWYTDITEFHLNNEKLYLSPILDGCGGDIVSYTISKHPDMDLVMTMLDKAFAKETALNNCIFHTDQGCQYQSPRYQRALKLHGITQSMSRKGNSMDDGLMENFFGLLKTEMFYDQEYKYHNLQELTQAIEEYIEYYNNERIKSRLKGLTPKEYRSQASINPIF
-----------------------------------------------------------------*--------------------------------------------------------------------------------------------------------------------------------------------------------------------------------------------------------------------------------------------------------------------------------------------------------------
ORTHOMCL56: RL07_01561 JVV01_02140 MV1AUS_02285 MV3AUS_02287 RL03_00421 RL05_00409 RL06_00373 1252CHN_02173 RL08_00297 RL09_00273 RL10_00270 RL11_01695 RL13_00428 RL14_00406 RL15_00405 RL16_00434 RL17_00411 RL19_00415 RL21_00418 RL23_01734 RL24_00408 RL25_01447 RL26_01543 RL27_00419 RL28_00429 RL29_00389 RL30_00413 RL32_00419 RL33_01500 SJ3CUS_02119 VMC1_00495 VMC2_01819 VMC4_02321 VMC6_02301 VMC…
>RL07_01561 (model 8)
MLNNWIREYKKNGYNVIIKQKGRPARDQRKAEISQETGERDPAAERRKLAIAYCERIRKKTKCLGSRRSEEIARVITDLRQEFKVSLNYVLAAIAEHPELPIIARSSYYKIIKRQPVKPKRSKLIARIHEIFNHHQGRYGYRRVALQLIREGWKVTEKTVRYWMHKLGLKGIRRNKRKYSSYKGTIGKIAPNLIHRDFFAALPNTKWYTDITEFHLNNEKLYLSPILDGCGGDIVSYTISKHPDMDLVMTMLDKAFAKETALNNCIFHTDQGCQYQSPRYQRALKLHGITQSMSRKGNSMDDGLMENFFGLLKTEMFYDQEYKYHNLQELTQAIEEYIEYYNNERIKSRLKGLTPKEYRSQASINPIF
-----------------------------------------------------------------*--------------------------------------------------------------------------------------------------------------------------------------------------------------------------------------------------------------------------------------------------------------------------------------------------------------
ORTHOMCL2958: AB70_01647 RL02_02090 RL09_00879 RL10_00866
>AB70_01647 (model 2)
LAIHGGTVKKIAFQGHTQDGLGMYVWVEGSDGWNVIYQEFGFDEADLKYVKVEVGDKVSVGDKIGHLASNAHGITHVHIGATEKDFATAELSAYKDDGTWKDPIKLIKDGLNNDAESEEDDGLSKTESEARDWIVQRESGGRWDAVNPANPSVYGRYQLKREYLNGDYS
----------------------------------------------------------------------------------------------------------------------------------------------------------------------+*+
ORTHOMCL2958: AB70_01647 RL02_02090 RL09_00879 RL10_00866
>AB70_01647 (model 8)
LAIHGGTVKKIAFQGHTQDGLGMYVWVEGSDGWNVIYQEFGFDEADLKYVKVEVGDKVSVGDKIGHLASNAHGITHVHIGATEKDFATAELSAYKDDGTWKDPIKLIKDGLNNDAESEEDDGLSKTESEARDWIVQRESGGRWDAVNPANPSVYGRYQLKREYLNGDYS
----------------------------------------------------------------------------------------------------------------------------------------------------------------------+**
ORTHOMCL1635: 1252CHN_01259 AB70_02349 CRI10_02439 CRI17_02352 CRI4_02429 CRI8_02330 JVV01_01271 MV1AUS_00937 RL02_01920 RL03_02085 RL05_01912 RL06_01844 RL07_01836 RL08_02059 RL09_02060 RL10_02095 RL11_02003 RL13_02034 RL14_02059 RL15_02001 RL16_02107 RL17_02173 RL19_02051 RL20_01930 RL21_02133 RL23_02021 RL24_02046 RL25_02044 RL26_02006 RL27_02122 RL28_02041 RL29_01989 RL30_02073 RL31_02153 RL3…
>1252CHN_01259 (model 2)
MKYRKLFAFLATIVCFIAINTNAKADSLNDVNKNVAKIANEQNFHSLAQDKLKNENVKKDVPILKNGTVKIHNNFNATSSHYSAYTFLAEIPDTVVKFHTSQEYVDGQFKINFYIDSITGPAPAAISVQLQFYSEPSLSGPITTNTASPIVKEGNITTGLLGSAVFPAATTFFAVGGAWGMVGYNGNSATYPISLSSIYLQNKIGQNFPEYVDPVSKKDAETPINTTWSRLPSSPVWTTMDRYYYIKEFSERYG
------------------------------------------------------------------------------------------------------------------------------------------------------------------------------------------------------------------------------------------------------+-------
ORTHOMCL1635: 1252CHN_01259 AB70_02349 CRI10_02439 CRI17_02352 CRI4_02429 CRI8_02330 JVV01_01271 MV1AUS_00937 RL02_01920 RL03_02085 RL05_01912 RL06_01844 RL07_01836 RL08_02059 RL09_02060 RL10_02095 RL11_02003 RL13_02034 RL14_02059 RL15_02001 RL16_02107 RL17_02173 RL19_02051 RL20_01930 RL21_02133 RL23_02021 RL24_02046 RL25_02044 RL26_02006 RL27_02122 RL28_02041 RL29_01989 RL30_02073 RL31_02153 RL3…
>1252CHN_01259 (model 8)
MKYRKLFAFLATIVCFIAINTNAKADSLNDVNKNVAKIANEQNFHSLAQDKLKNENVKKDVPILKNGTVKIHNNFNATSSHYSAYTFLAEIPDTVVKFHTSQEYVDGQFKINFYIDSITGPAPAAISVQLQFYSEPSLSGPITTNTASPIVKEGNITTGLLGSAVFPAATTFFAVGGAWGMVGYNGNSATYPISLSSIYLQNKIGQNFPEYVDPVSKKDAETPINTTWSRLPSSPVWTTMDRYYYIKEFSERYG
------------------------------------------------------------------------------------------------------------------------------------------------------------------------------------------------------------------------------------------------------+-------
ORTHOMCL2745: RL19_02132 RL24_02127 RL26_00024 RL29_02074 RL31_02234 RL32_02232 RL33_02046
>RL19_02132 (model 2)
MMKKNKIALISAATLMTVAPLAVLTNTTNEVQAATTKAVMHTALAYDKDGNSTGVKYNAYQYVTVESNPVKIDGSLYYKVSGKDQ
-------------------------------------------------------------------------------------
ORTHOMCL2745: RL19_02132 RL24_02127 RL26_00024 RL29_02074 RL31_02234 RL32_02232 RL33_02046
>RL19_02132 (model 8)
MMKKNKIALISAATLMTVAPLAVLTNTTNEVQAATTKAVMHTALAYDKDGNSTGVKYNAYQYVTVESNPVKIDGSLYYKVSGKDQ
-------------------------------------------------------------------------------------
ORTHOMCL1729: 2029_01310 AB70_00178 CRI10_00251 CRI17_00232 CRI4_00166 CRI8_00230 CTV05_01923 JVV01_00223 MV1AUS_00697 MV3AUS_01682 RL02_00137 RL05_00200 RL06_00171 RL07_00189 RL08_00196 RL09_00172 RL10_00162 RL11_00204 RL13_00211 RL14_00199 RL15_00202 RL16_00211 RL17_00198 RL19_00204 RL20_00209 RL23_00200 RL24_00204 RL25_00204 RL26_02279 RL28_00211 RL29_00184 RL30_00198 RL31_02437 RL32_00206 RL3…
>2029_01310 (model 2)
MKKNLRIVSAAAAALLAVAPVSVNAAATTTNTVAPASTDLGTLRGTIVLDRASNTQFSIKLSDAQKDAILQLGGDALKDAKPEDMKNITVKSASASNSNGEFQQVVTFTVNDRAYQVTLNAKFASQQGTPYFYNKDTNTVVNDGSTVSLNEIANGFSSSDLLNAIQKHYAWKTSDQSNDTINMTTTASDVESQLVAQGLKRASNGNFDYPANGFNLKLTAKSENGNSTTITVRINASVNYNAPAFVFDGNVYYNDNVMSNGKTSGNLVLKDTDKTKVIVNGKFNNDAVTGAVKAYVQSAYGTGFDKTPAELAAHQQLINSSNIKIDSSKVNPSVAGLYPVTITATNPAGFTSKLTVYAIVMGPTEKAPQEYVKADNTKVYNINGNVVSEAANIPALAKG…
---------------------------------------------------------------------------------------------------------------*-----------------------------------------------------------------------------------------------------------------------------------------------------------------------------------------------------------------------------------------------------------------------------------------------…
ORTHOMCL1729: 2029_01310 AB70_00178 CRI10_00251 CRI17_00232 CRI4_00166 CRI8_00230 CTV05_01923 JVV01_00223 MV1AUS_00697 MV3AUS_01682 RL02_00137 RL05_00200 RL06_00171 RL07_00189 RL08_00196 RL09_00172 RL10_00162 RL11_00204 RL13_00211 RL14_00199 RL15_00202 RL16_00211 RL17_00198 RL19_00204 RL20_00209 RL23_00200 RL24_00204 RL25_00204 RL26_02279 RL28_00211 RL29_00184 RL30_00198 RL31_02437 RL32_00206 RL3…
>2029_01310 (model 8)
MKKNLRIVSAAAAALLAVAPVSVNAAATTTNTVAPASTDLGTLRGTIVLDRASNTQFSIKLSDAQKDAILQLGGDALKDAKPEDMKNITVKSASASNSNGEFQQVVTFTVNDRAYQVTLNAKFASQQGTPYFYNKDTNTVVNDGSTVSLNEIANGFSSSDLLNAIQKHYAWKTSDQSNDTINMTTTASDVESQLVAQGLKRASNGNFDYPANGFNLKLTAKSENGNSTTITVRINASVNYNAPAFVFDGNVYYNDNVMSNGKTSGNLVLKDTDKTKVIVNGKFNNDAVTGAVKAYVQSAYGTGFDKTPAELAAHQQLINSSNIKIDSSKVNPSVAGLYPVTITATNPAGFTSKLTVYAIVMGPTEKAPQEYVKADNTKVYNINGNVVSEAANIPALAKG…
---------------------------------------------------------------------------------------------------------------*-----------------------------------------------------------------------------------------------------------------------------------------------------------------------------------------------------------------------------------------------------------------------------------------------…
ORTHOMCL2191: AB70_01663 CRI10_01425 CRI4_01684 MV3AUS_01191 RL02_02106 RL03_01004 RL06_02074 RL07_01969 RL09_00863 RL10_00850 RL14_02280 RL21_01097 RL27_02327 VMC2_00098 VMC6_00894
>AB70_01663 (model 2)
MLDHMKFNKEDYYPTTKIIVGYVNTELIGRVITCSKYKVGWSREGVINAYYSYSINSDSIQWNKPDEIGGLASTGEITGVVVDQHNIPYYIVDVDHWINNPNTGDGIYTPLIKASDIMTKYLSREQL
------------------------------*-------+------+-+---*-----+-----------------------------------++-------*---*------------------+-
ORTHOMCL2191: AB70_01663 CRI10_01425 CRI4_01684 MV3AUS_01191 RL02_02106 RL03_01004 RL06_02074 RL07_01969 RL09_00863 RL10_00850 RL14_02280 RL21_01097 RL27_02327 VMC2_00098 VMC6_00894
>AB70_01663 (model 8)
MLDHMKFNKEDYYPTTKIIVGYVNTELIGRVITCSKYKVGWSREGVINAYYSYSINSDSIQWNKPDEIGGLASTGEITGVVVDQHNIPYYIVDVDHWINNPNTGDGIYTPLIKASDIMTKYLSREQL
------------------------------*-------*------*-*---*-----*-----------------------------------**-------*---*------------------*-
ORTHOMCL2681: CTV05_02173 RL23_01055 RL25_01053 V4_00230
>CTV05_02173 (model 2)
MEALKVLGTEKIGKFEFTGIEGGFGEGKKAMLVKDIALIHGRPVKAINQAIERQLNRFKNGIDILDLKVENFAVTLSDLGFNQGQINASKHIYLLSERGYAKLLKILDDDKAWDIYDELVDNYFNMRVAIKENNPAIVNQERLKIMKDNSATRKANILYKIAMATESNSSKQALLAKAAETITGEMTIPIMKKKYYSAKEVGDKLGITANMVGRIANKLGLKADQPGQNKYGRWANSKSQYSDKEVPQWLYTNDGLKAIKKEL
---------------------------------------------------------------------------------------------------------------------------------------------------------------------------------------------------------------------------------------------------------------+-------
ORTHOMCL2681: CTV05_02173 RL23_01055 RL25_01053 V4_00230
>CTV05_02173 (model 8)
MEALKVLGTEKIGKFEFTGIEGGFGEGKKAMLVKDIALIHGRPVKAINQAIERQLNRFKNGIDILDLKVENFAVTLSDLGFNQGQINASKHIYLLSERGYAKLLKILDDDKAWDIYDELVDNYFNMRVAIKENNPAIVNQERLKIMKDNSATRKANILYKIAMATESNSSKQALLAKAAETITGEMTIPIMKKKYYSAKEVGDKLGITANMVGRIANKLGLKADQPGQNKYGRWANSKSQYSDKEVPQWLYTNDGLKAIKKEL
-----------------------------------------------------------------------------------------------------------------------------------------------------------------------------------------------------------------------------------------------+---------------*-------
ORTHOMCL2532: CRI8_00313 RL03_02375 RL14_02256 RL16_02317 RL21_02496 RL23_02317 RL24_02345 RL25_02150 RL27_02359 RL33_02428
>CRI8_00313 (model 8)
MDQKHYAKLINEELEKLPFYVKEFYLAKNLALTTKYQYLTEIRRFFTWLRREGISKAKSNTDIELSTLEHLKREDVMLYLDYLKNTVNMQNKYNSPTTINRSINALRSLFHYLTVVADNNDGEPYFYRNVMAKIESLPASQTLNYRAQTHMYRGKMKHDFLDFLSSKYENYVAGHFRKNKERDIAIIALMLGTGVRVQEAANTNVNDLNLKTAMLNVTRKGGQRDAVPISRWVLPYLEQYVDIRKSRYSPSNNEKALFLTEYRKQAKRITSNAIERFVSKYSEAFGRRLTPHKLRHTLASELYEETVLVSQQLGQRGTSATDLYTHVDQDKQKNALNR
--------------------------------------------------------------------------------------------------------------------------------------------------------------------------------------------------------------------------------------*-----------------------------------------------------------------------------------------------------------

## Sheet: curation
Gene	Product	eggNOG description	GO terms	KEGG KO	BRITE	COG cat	Location	Sequences/genomes	Query	PS sites	Protein ID	Curation	Positions	Position	aa	Posiiton	aa	Posiiton	aa	Posiiton	aa	Posiiton	aa	Posiiton	aa	Posiiton	aa	Posiiton	aa	Posiiton	aa	Posiiton	aa	Posiiton	aa
	Integrase core domain protein	COG2963 Transposase and inactivated derivatives		ko:K07497	ko00000	L	CYTOPLASMIC	53/50	RL07_01561	1	EKB63650.1	ok	160	160	S, P
lysM	Peptidase family M23	LysM domain				M	CYTOPLASMIC	4/50	AB70_01647	3	Fragmented	Frameshifted
	hypothetical protein	HNH endonuclease				V	SECRETED	42/50	1252CHN_01259	1	WP_005721858.1	Assembly issue
	S-layer protein precursor	SLAP domain				S	SECRETED	7/50	RL19_02132	3	Fragmented	Frameshifted
	S-layer protein precursor	SLAP domain				S	SECRETED	42/50	2029_01310	1	EKB61518.1	ok	130	130	D, Q, N, H
-	hypothetical protein	-	-	-	-	-	CYTOPLASMIC	15/50	AB70_01663	11	WP_126708926.1	ok	31, 39, 49, 48, 52, 58, 94, 95, 103, 107, 126	31	A, V	39	V, I	46	V, I	48	N, D	52	S, T	58	N, D	94	V, I	95	D, N	103	T, K	107	I, M	126	Q, K
	ORF6N domain protein	ORF6N domain				K	CYTOPLASMIC	10/50	CTV05_02173	2	WP_133463822.1	ok	240, 256	240	Q, R	256	L, Y
xerS	Tyrosine recombinase XerS	Belongs to the 'phage' integrase family	GO:0000150,GO:0003674,GO:0003824,GO:0006139,GO:0006259,GO:0006310,GO:0006725,GO:0006807,GO:0008150,GO:0008152,GO:0008907,GO:0009009,GO:0009037,GO:0009987,GO:0015074,GO:0034641,GO:0043170,GO:0044237,GO:0044238,GO:0044260,GO:0046483,GO:0071704,GO:0090304,GO:0140097,GO:1901360	ko:K04763	ko00000,ko03036	L	CYTOPLASMIC	4/50	CRI8_00313	1	WP_133475995.1	ok	231	231	R, N

## Sheet: positions
ORTHOMCL56			ORTHOMCL1729			ORTHOMCL2191													ORTHOMCL2532			ORTHOMCL2681
EKB63650.1	160		EKB61518.1	130		WP_126708926.1	31	39	46	48	52	58	94	95	103	107	126		WP_133475995.1	231		WP_133463822.1	240	256
RL05_00409	P		2029_01310	D		CRI10_01425	A	I	V	N	S	N	V	D	T	I	Q		RL14_02256	E		CTV05_02173	Q	L
JVV01_02140	P		CRI10_00251	D		RL02_02106	A	I	V	N	S	N	V	D	T	I	Q		RL16_02317	N		V4_00230	Q	L
MV1AUS_02285	P		CRI17_00232	D		RL03_01004	A	I	V	N	S	N	V	D	T	I	Q		RL23_02317	N		RL23_01055	R	Y
RL11_01695	P		CRI4_00166	D		RL06_02074	A	I	V	N	S	N	V	D	T	I	Q		RL25_02150	N		RL25_01053	R	Y
RL21_00418	P		CTV05_01923	D		RL07_01969	A	I	V	N	S	N	V	D	T	I	Q		CRI8_00313	R
RL23_01734	P		JVV01_00223	D		RL09_00863	A	I	V	N	S	N	V	D	T	I	Q		RL03_02375	R
RL27_00419	P		MV3AUS_01682	D		RL10_00850	A	I	V	N	S	N	V	D	T	I	Q		RL21_02496	R
SJ3CUS_02119	P		RL02_00137	D		RL14_02280	A	I	V	N	S	N	V	D	T	I	Q		RL24_02345	R
VMC1_00495	P		RL06_00171	D		RL21_01097	A	I	V	N	S	N	V	D	T	I	Q		RL27_02359	R
VMC2_01819	P		RL07_00189	D		RL27_02327	A	I	V	N	S	N	V	D	T	I	Q		RL33_02428	R
VMC4_02321	P		RL08_00196	D		MV3AUS_01191	A	V	I	D	S	D	I	N	T	M	Q
VMC6_02301	P		RL09_00172	D		VMC6_00894	A	V	I	D	S	D	I	N	T	M	Q
VMC7_01915	P		RL10_00162	D		VMC2_00098	T	V	I	N	T	D	V	N	K	I	K
RL06_00373	S		RL11_00204	D		AB70_01663	V	V	V	N	S	D	V	D	T	I	Q
1252CHN_02173	S		RL13_00211	D		CRI4_01684	V	V	V	N	S	D	V	D	T	M	Q
MV3AUS_02287	S		RL14_00199	D
RL03_00421	S		RL15_00202	D
RL07_01561	S		RL16_00211	D
RL08_00297	S		RL17_00198	D
RL09_00273	S		RL19_00204	D
RL10_00270	S		RL20_00209	D
RL13_00428	S		RL23_00200	D
RL14_00406	S		RL24_00204	D
RL15_00405	S		RL25_00204	D
RL16_00434	S		RL26_02279	D
RL17_00411	S		RL28_00211	D
RL19_00415	S		RL29_00184	D
RL24_00408	S		RL30_00198	D
RL25_01447	S		RL31_02437	D
RL26_01543	S		RL32_00206	D
RL28_00429	S		RL33_00213	D
RL29_00389	S		SJ3CUS_01840	D
RL30_00413	S		V4_02053	D
RL32_00419	S		VMC1_00269	D
RL33_01500	S		VMC4_02149	D
			VMC5_02237	D
			VMC6_02178	D
			VMC8_00552	D
			MV1AUS_00697	H
			CRI8_00230	N
			RL05_00200	N
			AB70_00178	Q
